# Supplementary material
Source: PubMed Central journal article supplement (PMC6287706)
Supplement: NIHMS80721-supplement-Supplementary_information.pdf [file NIHMS80721-supplement-Supplementary_information.pdf]

# Fine-mapping of an expanded set of type 2 diabetes loci to single-variant resolution using high-density imputation and islet-specific epigenome maps

## SUPPLEMENTARY INFORMATION

### 1. Supplementary Figures and Notes

These tables and notes are provided in this document.

#### i. Supplementary Figures

- **Supplementary Figure 1** | Sex-differentiated analyses.
- **Supplementary Figure 2** | Distributions of the allele frequency, imputation score, and posterior probability of association.
- **Supplementary Figure 3** | Islet annotation overlap of variant with the highest probability in genetic credible sets.
- **Supplementary Figure 4** | Enrichment of islet epigenetic states in T2D GWAS data.
- **Supplementary Figure 5** | Epigenome landscape of *ST6GAL1* locus.
- **Supplementary Figure 6** | Epigenome landscape of *ANK1* locus.
- **Supplementary Figure 7** | Epigenome landscape of *TCF7L2* locus.
- **Supplementary Figure 8** | Heritability estimates.
- **Supplementary Figure 9** | Polygenic risk score.
- **Supplementary Figure 10** | Genetic correlations between T2D and biomedical-relevant traits estimated by LD score regression implemented in LDHub.
- **Supplementary Figure 11** | Impact of BMI adjustment on genetic correlation estimates between various traits and T2D.

## ii. Supplementary Tables

- **Supplementary Table 2** | Summary statistics of distinct T2D association signals.
- **Supplementary Table 3** | Summary of comparison of effect estimates from BMI-adjusted and BMI-unadjusted analyses models obtained from the 28 studies the contributed to both analyses.
- **Supplementary Table 4** | Summary of sex-differentiated analysis.
- **Supplementary Table 5** | Summary of 99% credible sets for 380 distinct T2D association signals.
- **Supplementary Table 6** | Summary of comparison of HRC-based and 1000G-based 99% credible sets.
- **Supplementary Table 7** | Coding variants with posterior probability of association >50%.
- **Supplementary Table 8** | Non-coding credible set variants with >80% posterior probability of association.
- **Supplementary Table 9** | *TCF7L2* credible set variants.
- **Supplementary Table 10** | Summary results of LD Score regression analyses between T2D and various diseases, metabolic, and anthropometric traits.

## iii. Supplementary Notes

### 2. Supplementary Tables

This table (excel spreadsheet) is provided in separate document.

- **Supplementary Table 1** | Study characteristics and analysis details of studies included in the meta-analysis.

i. Supplementary Figures

**Supplementary Figure 1 | Sex-differentiated analyses.** **a**, Manhattan plot (top panel) of genome-wide association results for T2D (without BMI adjustment) from female-specific meta-analysis of up to 30,053 cases and 434,336 controls. The association  $p$ -value (on  $-\log_{10}$  scale) for each SNP ( $y$ -axis) is plotted against the genomic position (NCBI Build 37;  $x$ -axis). Association signals that reached genome-wide significance ( $p < 5 \times 10^{-8}$ ) in sex-combined analysis are shown in purple or yellow, if novel. **b**, Manhattan plot (bottom panel) of genome-wide association results for T2D with BMI adjustment from male-specific meta-analysis of up to 41,846 cases and 383,767 controls. **c**, Z-score for each of the 403 distinct signals from male-specific analysis ( $y$ -axis) is plotted against the z-score from the female-specific analysis ( $x$ -axis). Colour of each point varies with  $-\log_{10}$  gender heterogeneity  $p$ -value and diameter of the circle is proportional to sex-combined  $-\log_{10}$   $p$ -value.

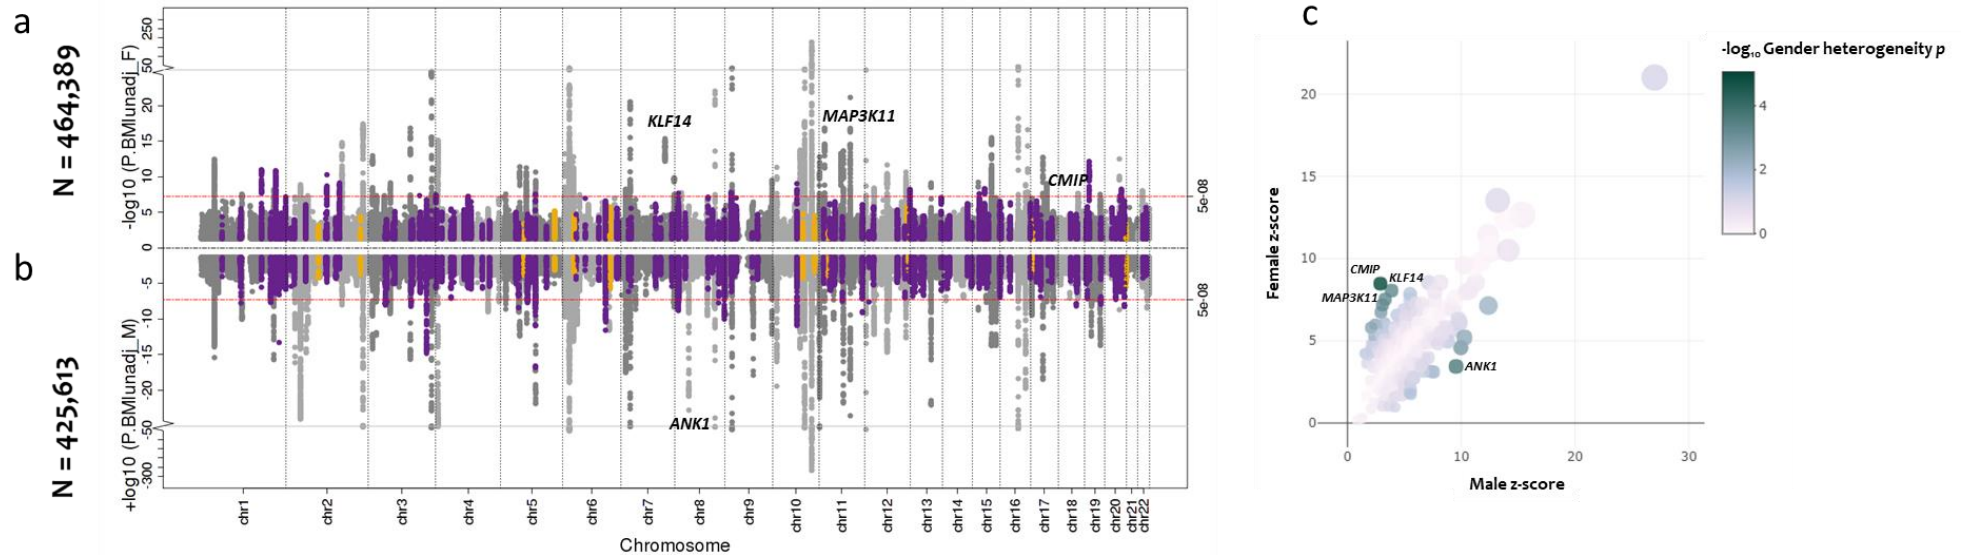

**Supplementary Figure 2 | Distributions of the allele frequency, imputation score, and posterior probability of association.** Distribution of the risk allele frequencies for all variants having >1% posterior probability of association in genetic credible set (x-axis) plotted against average imputation quality (y-axis). Diameter varies with the posterior probability of association assigned to each variant.

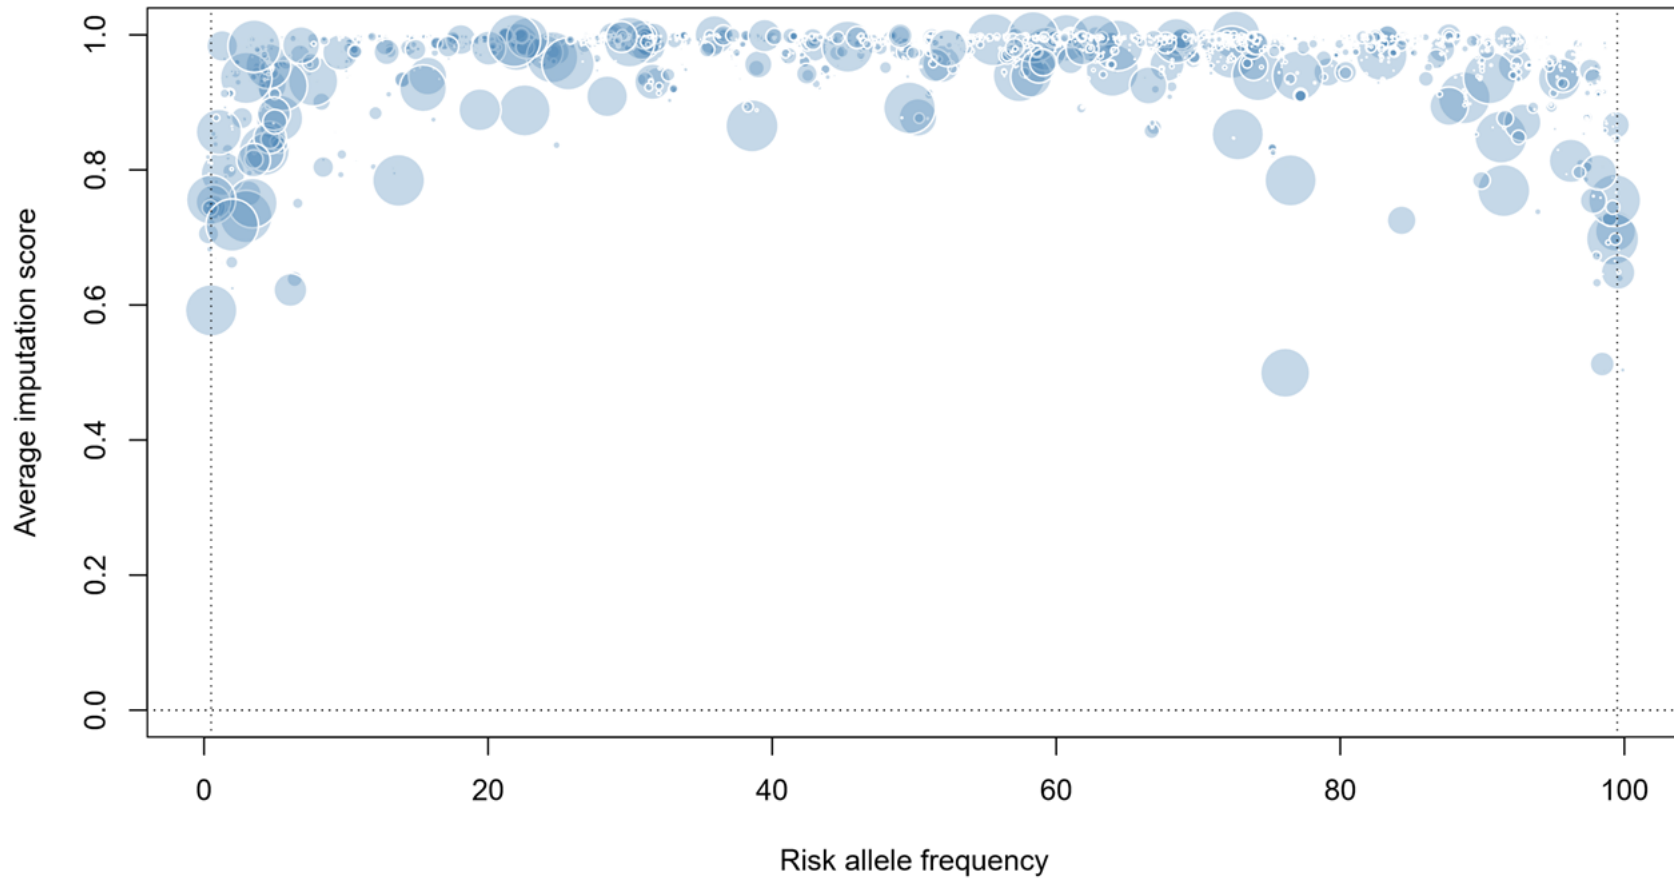

**Supplementary Figure 3 | Islet annotation overlap of variant with the highest probability in genetic credible sets.** Number of variants with posterior probability of association  $>1\%$  (x-axis) plotted against the highest posterior probability of association (y-axis) assigned to a variant in the credible set. Points are colour coded according to islet epigenome states.

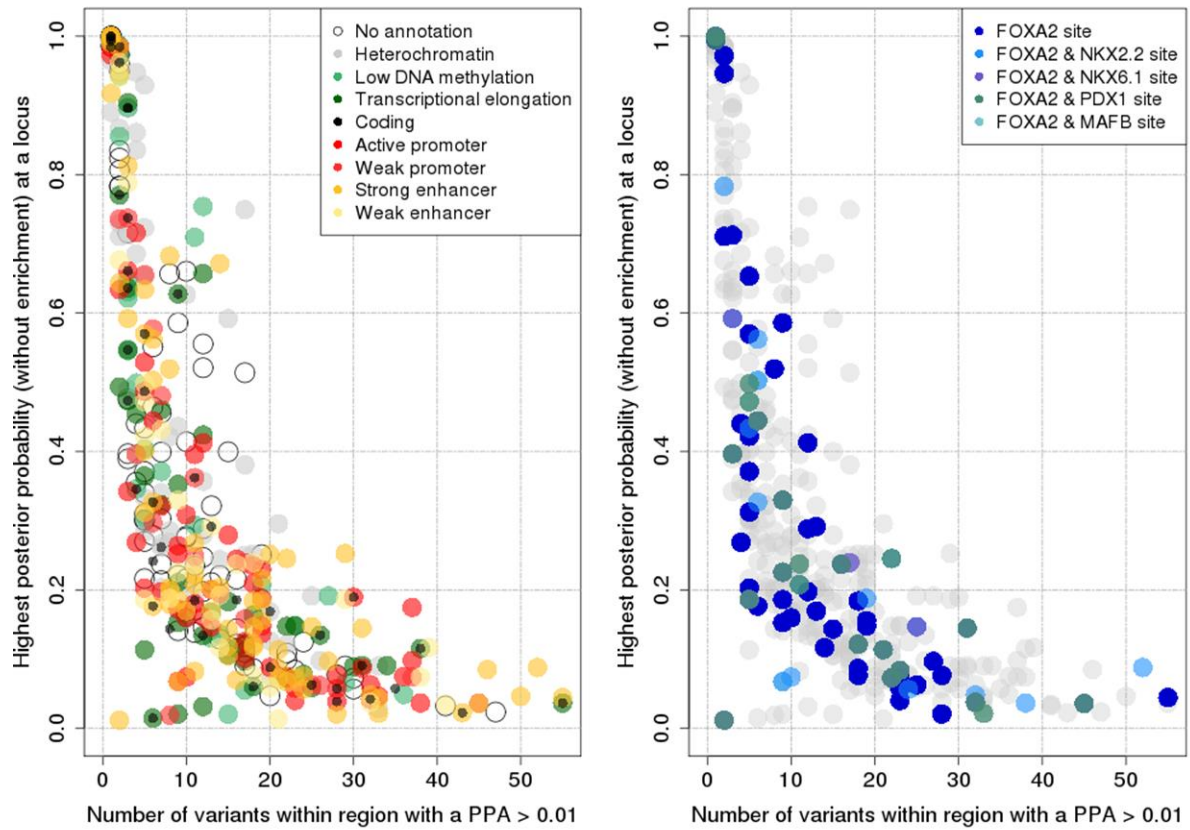

**Supplementary Figure 4 | Enrichment of islet epigenetic states in T2D GWAS data.** fGWAS  $\log_2$  fold enrichment including 95% confidence intervals (x-axis) of all chromatin states (y-axis) genome-wide.

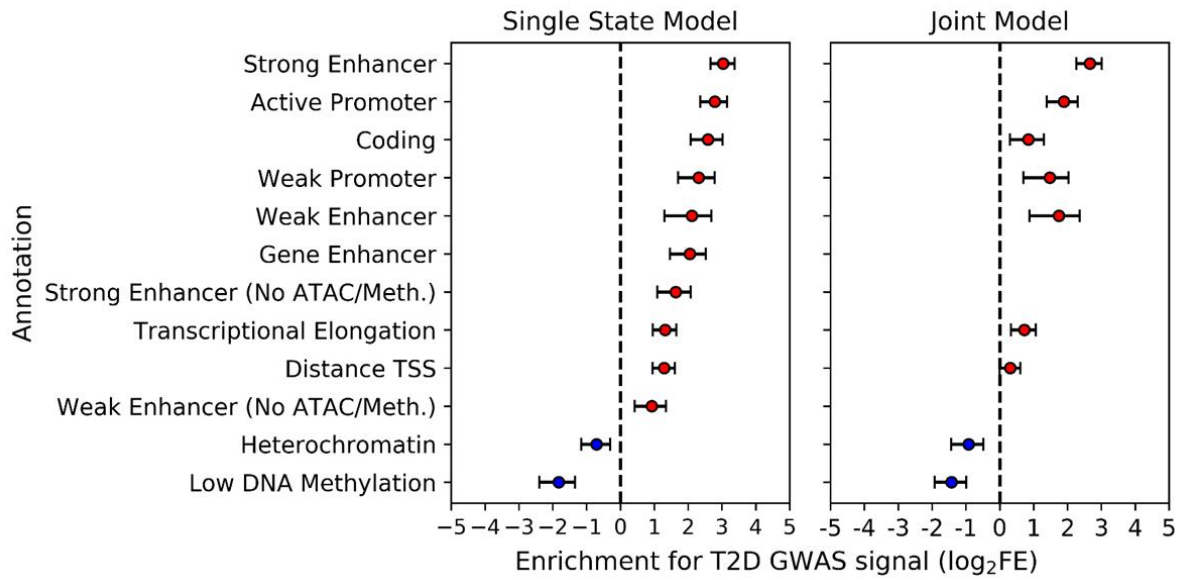

**Supplementary Figure 5 | Epigenome landscape of *ST6GAL1* locus.** For variants included in 99% credible set (PPA>1%) of each distinct signal at *ST6GAL1* locus, following information is shown: genomic position of each variant (colour coded for each distinct signal; variant with highest PPA in bold); whole genome bisulphite methylation data (black), 4 human islet ATAC-seq tracks (green, middle), islet chromatin states (from Thurner et al, Pasquali et al 2013, and Varshney et al 2017); and adipose, liver and skeletal muscle chromatin states from Varshney et al 2017.

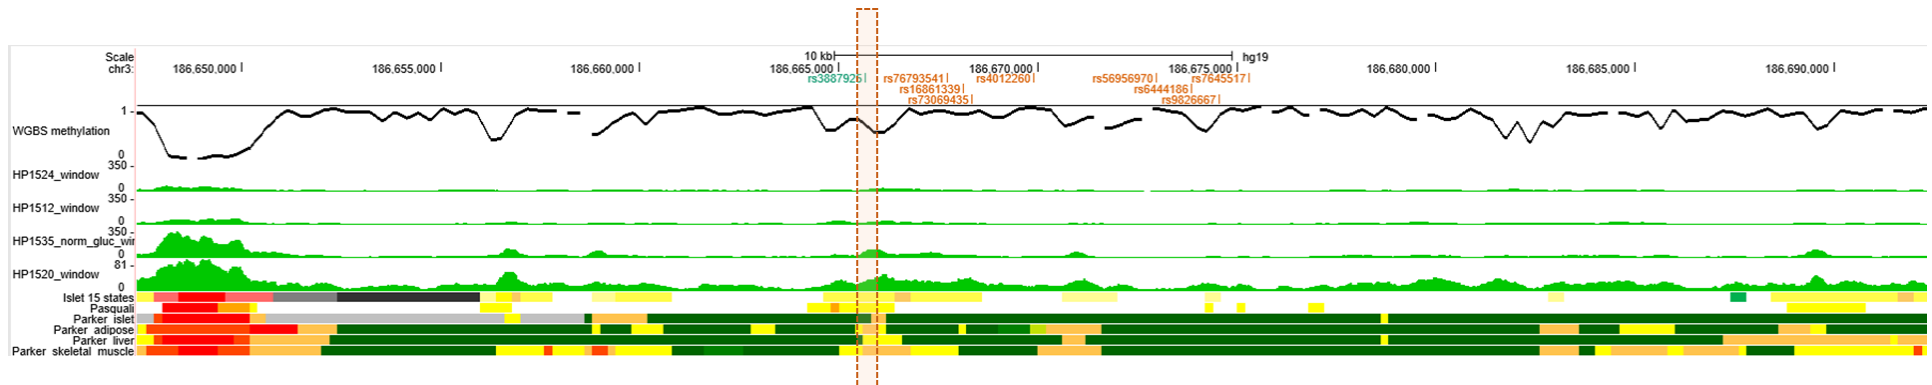

**Supplementary Figure 6 | Epigenome landscape of *ANK1* locus.** For variants included in 99% credible set (PPA>1%) of each distinct signal at *ANK1* locus, following information is shown: genomic position of each variant (colour coded for each distinct signal; variant with highest PPA in bold); whole genome bisulphite methylation data (black), 4 human islet ATAC-seq tracks (green, middle), islet chromatin states (from Thurner et al, Pasquali et al 2013, and Varshney et al 2017); and adipose, liver and skeletal muscle chromatin states from Varshney et al 2017.

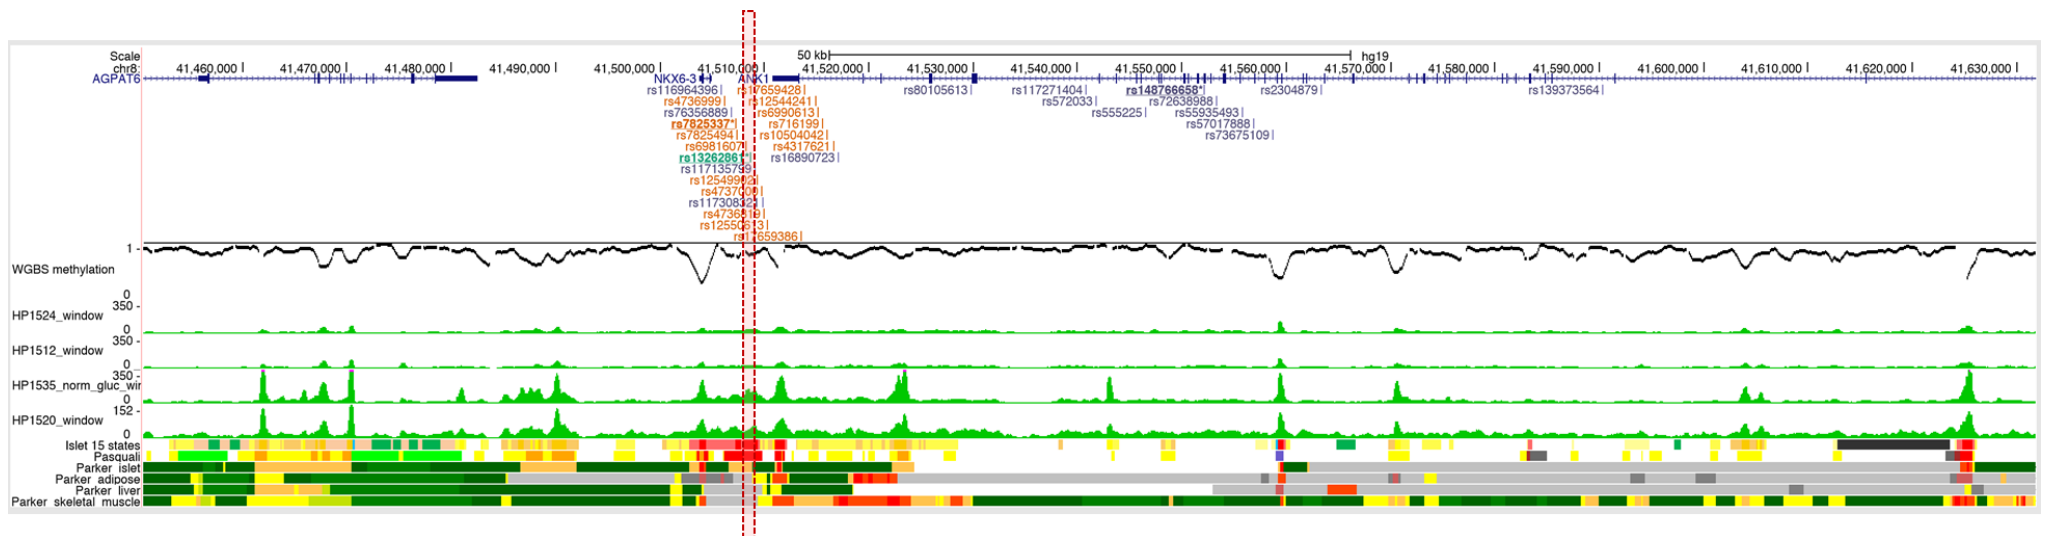



**Supplementary Figure 7 | Epigenome landscape of *TCF7L2* locus.** For variants included in 99% credible set (PPA>1%) of each distinct signal at *TCF7L2* locus, following information is shown: genomic position of each variant (colour coded for each distinct signal; variant with highest PPA in bold); whole genome bisulphite methylation data (black), 4 human islet ATAC-seq tracks (green, middle), islet chromatin states (from Thurner et al, Pasquali et al 2013, and Varshney et al 2017); and adipose, liver and skeletal muscle chromatin states from Varshney et al 2017.

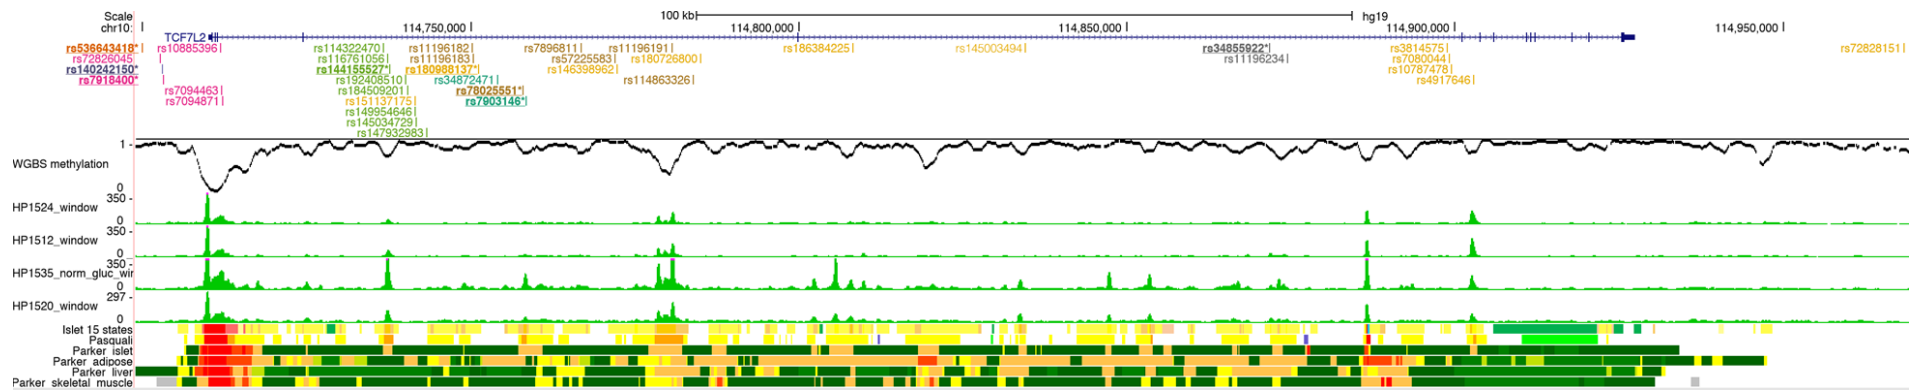

Supplementary Figure 8 | Heritability estimates.

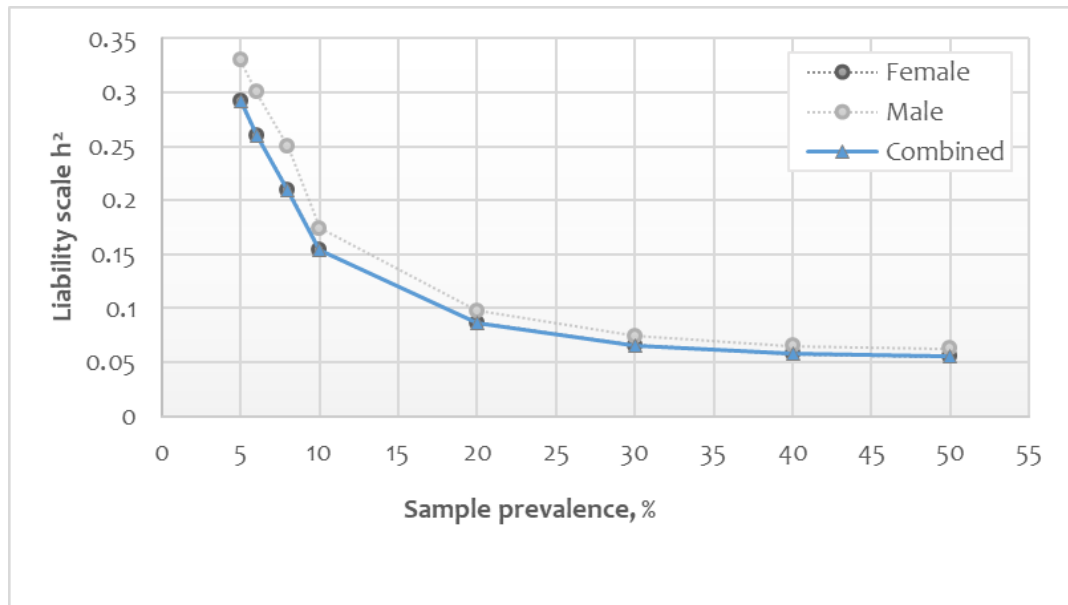

**Supplementary Figure 9 | Polygenic risk score.** Genome-wide polygenic risk score (PRS) identifies individuals with significantly increased risk of T2D. **a**, PRS in UK Biobank individuals is normally distributed with a shift towards right, observed for T2D cases. PRS is plotted on the x-axis, with values scaled to a mean of 0 and standard deviation of 1. **b**, Individuals were binned into 40 groups based on PRS, with each grouping representing 2.5% of population. **c**, BMI distribution within each bin.

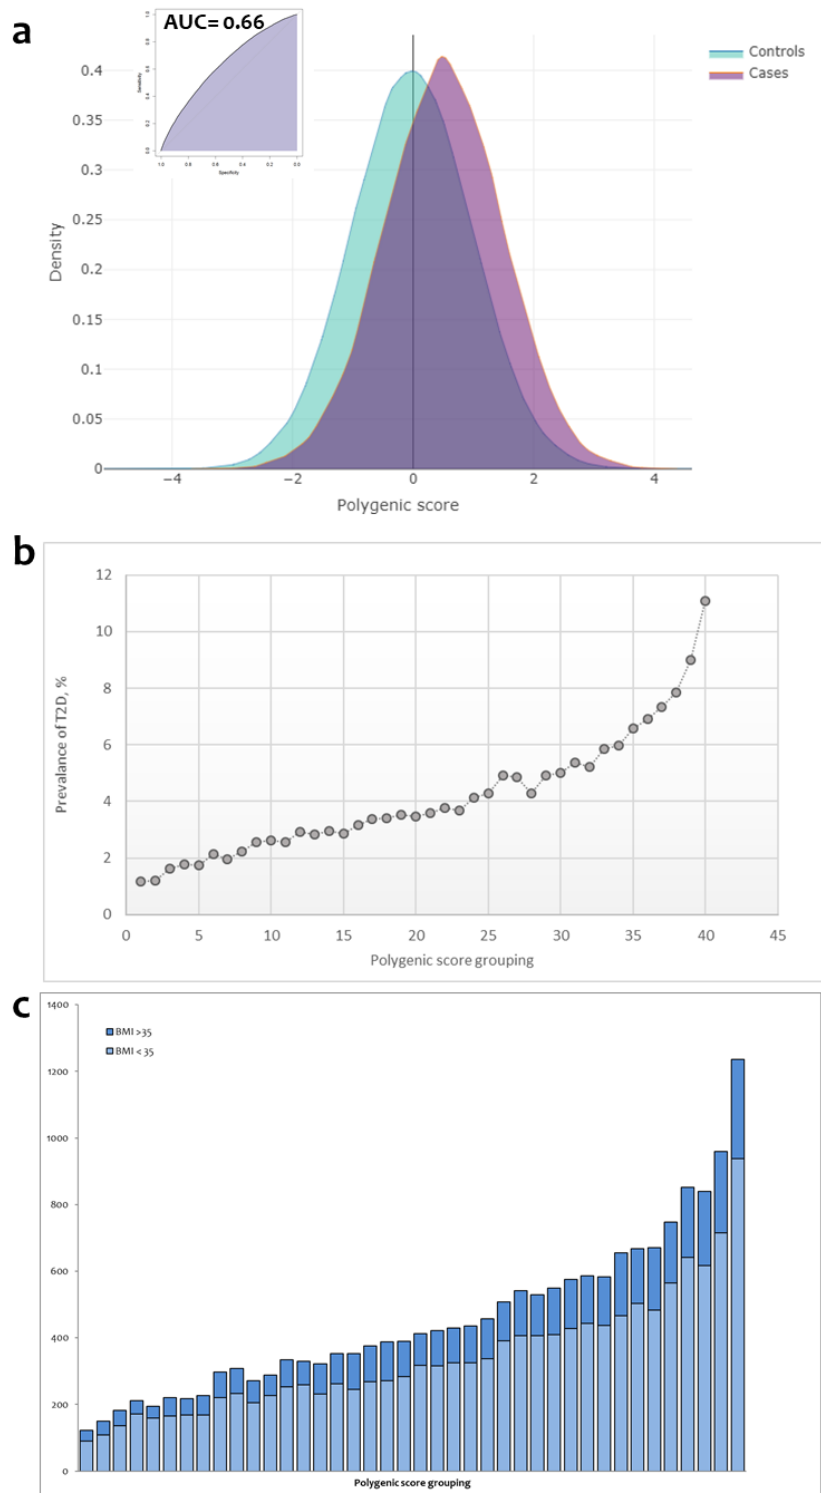



Supplementary Figure 11 | Impact of BMI adjustment on genetic correlation estimates between various traits and T2D.

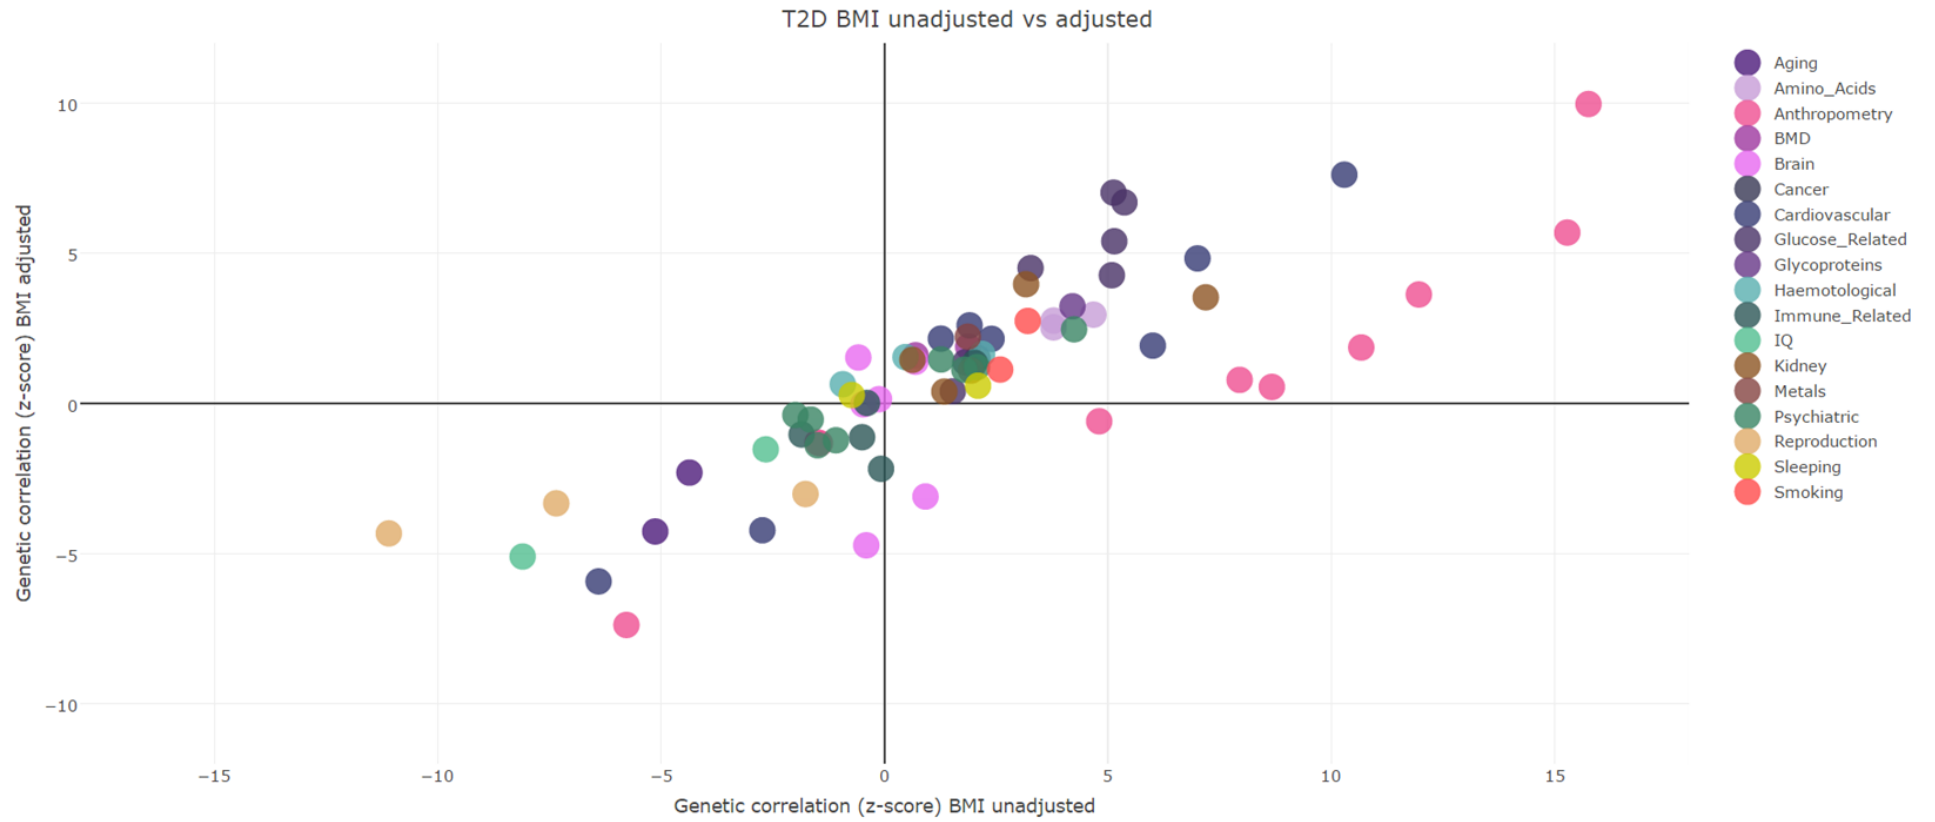

ii. Supplementary Tables

Supplementary Table 2 | Summary statistics of distinct T2D association signals.

| Nearest gene | Index variant | Chromosome | Position (Build 37 bp) | Risk allele | Other allele | RAF (%) | MAF (%) | p-value               | OR (95% CI)      | BMI adjusted | Novel | Primary | Cases  | Controls | Mean imputation quality score |
|--------------|---------------|------------|------------------------|-------------|--------------|---------|---------|-----------------------|------------------|--------------|-------|---------|--------|----------|-------------------------------|
| MACF1        | rs3768321     | 1          | 40,035,928             | T           | G            | 20.0    | 20.0    | 2.6x10 <sup>-26</sup> | 1.09 (1.07-1.10) | N            | N     | Y       | 74,117 | 823,996  | 0.98                          |
| FAF1         | rs58432198    | 1          | 51,256,091             | C           | T            | 88.1    | 11.9    | 2.1x10 <sup>-10</sup> | 1.07 (1.05-1.09) | N            | N     | Y       | 74,037 | 819,489  | 0.94                          |
| PATJ         | rs12140153    | 1          | 62,579,891             | G           | T            | 90.5    | 9.49    | 1.3x10 <sup>-8</sup>  | 1.07 (1.04-1.09) | N            | Y     | Y       | 74,117 | 823,997  | 0.94                          |
| DENND2C      | rs184660829   | 1          | 115,144,899            | C           | T            | 0.0200  | 0.0200  | 2.5x10 <sup>-9</sup>  | 8.05 (3.86-16.8) | N            | Y     | Y       | 33,287 | 471,082  | 0.69                          |
| PTGFRN       | rs1127215     | 1          | 117,532,790            | C           | T            | 58.4    | 41.6    | 1.6x10 <sup>-13</sup> | 1.05 (1.04-1.06) | N            | Y     | Y       | 74,117 | 823,995  | 1.00                          |
| NOTCH2       | rs1493694     | 1          | 120,526,982            | T           | C            | 10.9    | 10.9    | 2.7x10 <sup>-16</sup> | 1.09 (1.07-1.11) | N            | N     | Y       | 74,117 | 823,997  | 0.99                          |
| FAM63A       | rs10305745    | 1          | 150,786,038            | A           | G            | 1.45    | 1.45    | 4.4x10 <sup>-6</sup>  | 1.28 (1.15-1.42) | N            | N     | N       | 73,395 | 821,537  | 0.91                          |
| FAM63A       | rs145904381   | 1          | 151,017,991            | T           | C            | 98.7    | 1.33    | 2.6x10 <sup>-8</sup>  | 1.19 (1.12-1.26) | N            | N     | Y       | 74,117 | 823,997  | 0.79                          |
| SEC16B       | rs539515      | 1          | 177,889,025            | C           | A            | 19.8    | 19.8    | 1.6x10 <sup>-10</sup> | 1.05 (1.04-1.07) | N            | Y     | Y       | 74,116 | 823,996  | 1.00                          |
| DSTYK        | rs12048743    | 1          | 205,114,873            | G           | C            | 44.2    | 44.2    | 3.5x10 <sup>-9</sup>  | 1.04 (1.03-1.05) | N            | Y     | Y       | 74,117 | 823,996  | 1.00                          |
| SRGAP2       | rs9430095     | 1          | 206,593,900            | C           | G            | 49.4    | 49.4    | 1.9x10 <sup>-8</sup>  | 1.04 (1.02-1.05) | N            | Y     | Y       | 74,116 | 823,996  | 0.97                          |
| PROX1        | rs79687284    | 1          | 214,150,821            | C           | G            | 3.48    | 3.48    | 2.6x10 <sup>-16</sup> | 1.16 (1.12-1.21) | N            | N     | N       | 74,117 | 823,997  | 0.81                          |
| PROX1        | rs340874      | 1          | 214,159,256            | C           | T            | 55.6    | 44.5    | 1.6x10 <sup>-22</sup> | 1.07 (1.05-1.08) | N            | N     | Y       | 74,117 | 823,997  | 0.99                          |
| PROX1        | rs114526150   | 1          | 214,175,531            | G           | T            | 2.25    | 2.25    | 4.2x10 <sup>-7</sup>  | 1.12 (1.07-1.17) | N            | N     | N       | 74,116 | 823,997  | 0.97                          |
| LYPLAL1      | rs553014999   | 1          | 219,584,164            | C           | T            | 0.130   | 0.130   | 7.7x10 <sup>-6</sup>  | 1.90 (1.43-2.51) | N            | Y     | N       | 45,408 | 756,103  | 0.67                          |
| LYPLAL1      | rs2820446     | 1          | 219,748,818            | C           | G            | 70.6    | 29.5    | 3.3x10 <sup>-16</sup> | 1.06 (1.04-1.07) | N            | Y     | Y       | 74,117 | 823,997  | 1.00                          |
| ABCB10       | rs348330      | 1          | 229,672,955            | G           | A            | 36.1    | 36.1    | 2.7x10 <sup>-14</sup> | 1.05 (1.04-1.07) | N            | Y     | Y       | 74,115 | 823,996  | 0.95                          |
| GNG4         | rs291367      | 1          | 235,690,800            | G           | A            | 63.2    | 36.8    | 4.7x10 <sup>-10</sup> | 1.04 (1.03-1.06) | N            | Y     | Y       | 62,669 | 545,620  | 1.00                          |
| TMEM18       | rs62107261    | 2          | 422,144                | T           | C            | 95.4    | 4.64    | 3.8x10 <sup>-12</sup> | 1.12 (1.08-1.15) | N            | N     | Y       | 74,117 | 823,997  | 0.85                          |
| TMEM18       | rs35913461    | 2          | 653,575                | C           | T            | 82.9    | 17.1    | 1.6x10 <sup>-11</sup> | 1.06 (1.04-1.08) | N            | N     | N       | 74,117 | 823,996  | 0.99                          |
| FAM49A       | rs11680058    | 2          | 16,574,669             | A           | G            | 86.3    | 13.7    | 1.4x10 <sup>-18</sup> | 1.06 (1.04-1.08) | N            | Y     | Y       | 74,115 | 823,995  | 0.78                          |
| DTNB         | rs17802463    | 2          | 25,643,221             | G           | T            | 73.1    | 26.9    | 2.9x10 <sup>-8</sup>  | 1.04 (1.03-1.05) | N            | Y     | Y       | 74,117 | 823,997  | 1.00                          |
| GCKR         | rs1260326     | 2          | 27,730,940             | C           | T            | 60.7    | 39.3    | 6.5x10 <sup>-25</sup> | 1.07 (1.06-1.08) | N            | N     | Y       | 74,117 | 823,997  | 1.00                          |
| THADA        | rs28525376    | 2          | 43,207,872             | G           | T            | 42.2    | 42.2    | 2.7x10 <sup>-6</sup>  | 1.03 (1.02-1.04) | N            | N     | N       | 74,116 | 823,995  | 0.99                          |
| THADA        | rs6708643     | 2          | 43,430,440             | A           | G            | 50.1    | 49.9    | 3.9x10 <sup>-8</sup>  | 1.04 (1.02-1.05) | N            | N     | N       | 74,116 | 823,995  | 0.97                          |
| THADA        | rs80147536    | 2          | 43,698,028             | A           | T            | 90.4    | 9.57    | 2.7x10 <sup>-29</sup> | 1.13 (1.11-1.16) | N            | N     | Y       | 74,116 | 823,997  | 1.00                          |
| BNIP1        | rs10193538    | 2          | 58,981,064             | T           | G            | 61.0    | 39.0    | 8.9x10 <sup>-9</sup>  | 1.04 (1.02-1.05) | N            | Y     | N       | 74,116 | 823,996  | 1.00                          |
| BNIP1        | rs6545714     | 2          | 59,307,725             | G           | A            | 39.2    | 39.2    | 8.9x10 <sup>-9</sup>  | 1.04 (1.02-1.05) | N            | Y     | Y       | 74,116 | 823,996  | 1.00                          |
| BCL11A       | rs243024      | 2          | 60,583,665             | A           | G            | 46.0    | 46.0    | 2.5x10 <sup>-20</sup> | 1.06 (1.05-1.07) | N            | N     | Y       | 74,116 | 823,996  | 1.00                          |
| CEP68        | rs2249105     | 2          | 65,287,896             | A           | G            | 63.4    | 36.6    | 2.2x10 <sup>-14</sup> | 1.10 (1.08-1.13) | N            | N     | Y       | 74,117 | 823,997  | 1.00                          |
| CEP68        | rs2052261     | 2          | 65,355,270             | G           | A            | 30.4    | 30.4    | 2.5x10 <sup>-16</sup> | 1.07 (1.04-1.09) | N            | N     | N       | 74,116 | 823,996  | 1.00                          |
| CEP68        | rs2028150     | 2          | 65,655,012             | C           | G            | 59.8    | 40.2    | 2.3x10 <sup>-12</sup> | 1.05 (1.03-1.06) | N            | N     | N       | 74,117 | 823,997  | 1.00                          |
| TMEM127      | rs79046683    | 2          | 96,913,918             | T           | G            | 0.480   | 0.480   | 3.0x10 <sup>-9</sup>  | 2.34 (1.73-3.16) | Y            | Y     | Y       | 34,775 | 477,429  | 0.91                          |
| DDX18        | rs562386202   | 2          | 118,071,061            | G           | A            | 0.0600  | 0.0600  | 4.2x10 <sup>-8</sup>  | 3.20 (2.11-4.86) | N            | Y     | Y       | 26,326 | 457,160  | 0.72                          |
| GLI2         | rs11688931    | 2          | 121,318,166            | C           | G            | 84.9    | 15.1    | 8.2x10 <sup>-6</sup>  | 1.04 (1.02-1.06) | N            | Y     | N       | 74,117 | 823,997  | 0.98                          |
| GLI2         | rs11688682    | 2          | 121,347,612            | G           | C            | 72.8    | 27.2    | 4.2x10 <sup>-9</sup>  | 1.05 (1.03-1.06) | N            | Y     | Y       | 74,117 | 823,996  | 0.85                          |
| GLI2         | rs66477705    | 2          | 121,378,852            | T           | C            | 96.7    | 3.30    | 2.6x10 <sup>-6</sup>  | 1.09 (1.05-1.13) | N            | Y     | N       | 74,117 | 823,997  | 0.95                          |
| PABPC1P2     | rs35999103    | 2          | 147,861,633            | T           | C            | 15.5    | 15.5    | 9.7x10 <sup>-9</sup>  | 1.05 (1.03-1.07) | N            | Y     | Y       | 74,116 | 823,997  | 1.00                          |
| CYTIP        | rs13426680    | 2          | 158,339,550            | A           | G            | 93.7    | 6.27    | 6.7x10 <sup>-10</sup> | 1.09 (1.06-1.11) | N            | Y     | Y       | 74,117 | 823,996  | 0.99                          |
| RBMS1        | rs3772071     | 2          | 161,135,544            | T           | C            | 71.4    | 28.7    | 1.2x10 <sup>-11</sup> | 1.05 (1.03-1.06) | N            | N     | Y       | 74,115 | 823,995  | 1.00                          |
| GRB14/COBLL1 | rs10195252    | 2          | 165,513,091            | T           | C            | 58.6    | 41.4    | 6.0x10 <sup>-25</sup> | 1.07 (1.06-1.08) | N            | N     | Y       | 74,117 | 823,997  | 0.99                          |
| GRB14/COBLL1 | rs13024606    | 2          | 165,573,194            | T           | C            | 4.72    | 4.72    | 1.7x10 <sup>-8</sup>  | 1.09 (1.06-1.13) | N            | N     | N       | 74,117 | 823,997  | 0.93                          |
| CRYBA2       | rs113414093   | 2          | 219,859,171            | A           | G            | 5.14    | 5.14    | 6.6x10 <sup>-9</sup>  | 1.12 (1.08-1.17) | Y            | Y     | Y       | 50,402 | 523,888  | 0.61                          |
| IRS1         | rs2972144     | 2          | 227,101,411            | G           | A            | 63.9    | 36.2    | 2.1x10 <sup>-46</sup> | 1.10 (1.08-1.11) | N            | N     | Y       | 74,115 | 823,996  | 1.00                          |
| PPARG        | rs11709077    | 3          | 12,336,507             | G           | A            | 87.7    | 12.4    | 1.8x10 <sup>-36</sup> | 1.14 (1.11-1.16) | N            | N     | Y       | 74,117 | 823,997  | 1.00                          |
| PPARG        | rs17819328    | 3          | 12,489,342             | G           | T            | 42.5    | 42.5    | 4.8x10 <sup>-16</sup> | 1.06 (1.04-1.07) | N            | N     | N       | 74,117 | 823,997  | 0.99                          |
| UBE2E2       | rs35352848    | 3          | 23,455,582             | T           | C            | 78.8    | 21.2    | 1.3x10 <sup>-17</sup> | 1.07 (1.05-1.09) | N            | N     | Y       | 74,117 | 823,997  | 1.00                          |
| UBE2E2       | rs17013314    | 3          | 23,510,044             | G           | A            | 3.13    | 3.13    | 8.4x10 <sup>-9</sup>  | 1.11 (1.07-1.15) | N            | N     | N       | 74,116 | 823,996  | 0.97                          |
| KIF9         | rs11926707    | 3          | 46,925,539             | C           | T            | 62.6    | 37.4    | 2.1x10 <sup>-8</sup>  | 1.27 (1.17-1.38) | N            | N     | Y       | 74,115 | 823,995  | 0.95                          |
| KIF9         | rs75423501    | 3          | 47,242,923             | G           | A            | 10.1    | 10.1    | 7.5x10 <sup>-6</sup>  | 1.05 (1.03-1.08) | N            | N     | N       | 74,036 | 819,488  | 0.78                          |
| RBM6         | rs4688760     | 3          | 49,980,596             | T           | C            | 68.4    | 31.6    | 3.5x10 <sup>-10</sup> | 1.04 (1.03-1.06) | N            | Y     | Y       | 74,115 | 823,996  | 0.93                          |
| RFT1         | rs2581787     | 3          | 53,127,677             | T           | G            | 56.3    | 43.7    | 2.4x10 <sup>-8</sup>  | 1.04 (1.02-1.05) | N            | Y     | Y       | 74,116 | 823,996  | 1.00                          |
| CACNA2D3     | rs76263492    | 3          | 54,828,827             | T           | G            | 4.52    | 4.52    | 6.3x10 <sup>-9</sup>  | 1.09 (1.06-1.13) | N            | Y     | Y       | 74,117 | 823,996  | 0.95                          |
| PSMD6        | rs3774723     | 3          | 63,962,339             | G           | A            | 84.4    | 15.6    | 1.6x10 <sup>-13</sup> | 1.07 (1.05-1.09) | N            | N     | Y       | 74,117 | 823,996  | 0.99                          |
| PSMD6        | rs74368513    | 3          | 64,460,694             | G           | A            | 99.6    | 0.440   | 7.0x10 <sup>-6</sup>  | 1.31 (1.16-1.47) | N            | N     | N       | 72,923 | 820,276  | 0.65                          |

|          |             |   |             |   |   |       |       |                       |                  |   |   |   |        |         |      |
|----------|-------------|---|-------------|---|---|-------|-------|-----------------------|------------------|---|---|---|--------|---------|------|
| ADAMTS9  | rs9860730   | 3 | 64,701,146  | A | G | 70.4  | 29.6  | 4.9x10 <sup>-15</sup> | 1.06 (1.04-1.07) | N | N | Y | 74,117 | 823,997 | 1.00 |
| SHQ1     | rs13085136  | 3 | 72,865,183  | C | T | 92.8  | 7.17  | 1.5x10 <sup>-8</sup>  | 1.08 (1.05-1.10) | N | Y | Y | 74,117 | 823,997 | 0.87 |
| ROBO2    | rs2272163   | 3 | 77,671,721  | C | A | 61.8  | 38.2  | 9.6x10 <sup>-9</sup>  | 1.04 (1.02-1.05) | N | Y | Y | 74,116 | 823,996 | 0.98 |
| ADCY5    | rs11708067  | 3 | 123,065,778 | A | G | 77.2  | 22.8  | 5.2x10 <sup>-32</sup> | 1.09 (1.08-1.11) | N | N | Y | 74,117 | 823,997 | 1.00 |
| SLC12A8  | rs649961    | 3 | 124,926,637 | T | C | 46.5  | 46.5  | 9.9x10 <sup>-10</sup> | 1.04 (1.03-1.05) | N | Y | Y | 74,115 | 823,996 | 0.99 |
| TMCC1    | rs9828772   | 3 | 129,333,182 | C | G | 89.8  | 10.2  | 4.2x10 <sup>-8</sup>  | 1.06 (1.04-1.08) | N | Y | Y | 74,117 | 823,997 | 0.98 |
| TMCC1    | rs559138871 | 3 | 129,470,067 | T | C | 0.200 | 0.200 | 7.3x10 <sup>-6</sup>  | 1.49 (1.25-1.77) | N | Y | N | 67,516 | 797,362 | 0.84 |
| TSC22D2  | rs62271373  | 3 | 150,066,540 | A | T | 5.53  | 5.53  | 1.0x10 <sup>-9</sup>  | 1.09 (1.06-1.12) | N | Y | Y | 74,117 | 823,997 | 0.92 |
| MBNL1    | rs13065698  | 3 | 152,086,533 | A | G | 60.0  | 40.0  | 8.1x10 <sup>-13</sup> | 1.05 (1.03-1.06) | N | Y | Y | 74,117 | 823,997 | 1.00 |
| MBNL1    | rs74653713  | 3 | 152,417,881 | C | A | 95.7  | 4.29  | 1.2x10 <sup>-8</sup>  | 1.10 (1.06-1.13) | N | Y | N | 74,116 | 823,997 | 0.99 |
| MBNL1    | rs35497231  | 3 | 152,433,628 | C | T | 31.7  | 31.7  | 7.6x10 <sup>-8</sup>  | 1.04 (1.02-1.05) | N | Y | N | 74,115 | 823,995 | 1.00 |
| EGFEM1P  | rs7629630   | 3 | 168,218,841 | A | T | 85.7  | 14.3  | 2.5x10 <sup>-8</sup>  | 1.05 (1.03-1.07) | N | Y | Y | 74,117 | 823,997 | 1.00 |
| SLC2A2   | rs9873618   | 3 | 170,733,076 | G | A | 71.0  | 29.0  | 4.8x10 <sup>-21</sup> | 1.07 (1.05-1.08) | N | Y | Y | 74,117 | 823,996 | 0.99 |
| ABCC5    | rs2872246   | 3 | 183,738,460 | A | C | 45.4  | 45.4  | 1.5x10 <sup>-8</sup>  | 1.04 (1.02-1.05) | N | Y | Y | 74,117 | 823,996 | 1.00 |
| IGF2BP2  | rs6780171   | 3 | 185,503,456 | A | T | 31.4  | 31.4  | 9.0x10 <sup>-56</sup> | 1.14 (1.12-1.16) | N | N | Y | 74,115 | 823,996 | 1.00 |
| IGF2BP2  | rs150111048 | 3 | 185,514,421 | G | A | 23.9  | 23.9  | 2.7x10 <sup>-7</sup>  | 1.12 (1.07-1.16) | N | N | N | 69,270 | 800,165 | 0.50 |
| IGF2BP2  | rs11717959  | 3 | 185,541,213 | G | T | 62.1  | 37.9  | 3.0x10 <sup>-6</sup>  | 1.04 (1.02-1.06) | N | N | N | 74,117 | 823,997 | 0.99 |
| IGF2BP2  | rs1516728   | 3 | 185,829,891 | A | T | 75.9  | 24.1  | 6.3x10 <sup>-6</sup>  | 1.03 (1.02-1.05) | N | N | N | 74,115 | 823,995 | 0.99 |
| ST6GAL1  | rs3887925   | 3 | 186,665,645 | T | C | 54.7  | 45.3  | 3.1x10 <sup>-22</sup> | 1.07 (1.05-1.08) | N | N | Y | 74,117 | 823,997 | 0.98 |
| ST6GAL1  | rs7645517   | 3 | 186,675,277 | A | G | 5.76  | 5.76  | 2.5x10 <sup>-8</sup>  | 1.08 (1.05-1.11) | N | N | N | 74,117 | 823,996 | 0.96 |
| LPP      | rs4686471   | 3 | 187,740,899 | C | T | 61.0  | 39.0  | 1.7x10 <sup>-20</sup> | 1.06 (1.05-1.08) | N | N | Y | 74,115 | 823,995 | 1.00 |
| PCGF3    | rs111827885 | 4 | 616,608     | C | T | 1.56  | 1.56  | 8.4x10 <sup>-6</sup>  | 1.18 (1.10-1.27) | N | Y | N | 57,868 | 533,395 | 0.51 |
| PCGF3    | rs1531583   | 4 | 744,972     | T | G | 4.58  | 4.58  | 3.5x10 <sup>-14</sup> | 1.13 (1.09-1.16) | N | Y | Y | 74,117 | 823,997 | 0.95 |
| PCGF3    | rs35654957  | 4 | 1,010,077   | C | T | 36.7  | 36.7  | 4.2x10 <sup>-7</sup>  | 1.03 (1.02-1.05) | N | Y | N | 74,116 | 823,996 | 0.94 |
| MAEA     | rs56337234  | 4 | 1,784,403   | C | T | 50.3  | 49.7  | 8.6x10 <sup>-18</sup> | 1.06 (1.04-1.07) | N | N | Y | 74,116 | 823,995 | 0.88 |
| HTT      | rs362307    | 4 | 3,241,845   | T | C | 7.68  | 7.68  | 1.1x10 <sup>-9</sup>  | 1.08 (1.05-1.10) | N | Y | Y | 74,117 | 823,997 | 0.93 |
| WFS1     | rs1801212   | 4 | 6,302,519   | A | G | 70.9  | 29.1  | 4.5x10 <sup>-6</sup>  | 1.05 (1.03-1.07) | N | N | N | 74,117 | 823,997 | 0.99 |
| WFS1     | rs10937721  | 4 | 6,306,763   | C | G | 58.8  | 41.2  | 1.5x10 <sup>-8</sup>  | 1.06 (1.04-1.08) | N | N | Y | 74,115 | 823,995 | 0.97 |
| LCORL    | rs12640250  | 4 | 17,792,869  | C | A | 71.5  | 28.5  | 3.7x10 <sup>-8</sup>  | 1.04 (1.03-1.05) | N | Y | Y | 74,115 | 823,995 | 0.98 |
| GNPDA2   | rs10938398  | 4 | 45,186,139  | A | G | 42.9  | 42.9  | 3.6x10 <sup>-12</sup> | 1.05 (1.03-1.06) | N | Y | Y | 74,116 | 823,996 | 0.99 |
| USP46    | rs2102278   | 4 | 52,818,664  | G | A | 31.9  | 31.9  | 3.7x10 <sup>-8</sup>  | 1.04 (1.02-1.05) | N | Y | Y | 74,116 | 823,995 | 0.95 |
| USP46    | rs114447556 | 4 | 53,207,093  | T | C | 8.39  | 8.39  | 8.4x10 <sup>-6</sup>  | 1.06 (1.03-1.08) | N | Y | N | 74,116 | 823,997 | 0.80 |
| SCD5     | rs12642790  | 4 | 83,578,271  | A | G | 33.8  | 33.8  | 4.4x10 <sup>-10</sup> | 1.04 (1.03-1.06) | N | Y | Y | 74,116 | 823,996 | 1.00 |
| FAM13A   | rs1903002   | 4 | 89,740,894  | G | C | 50.1  | 50.0  | 2.7x10 <sup>-8</sup>  | 1.04 (1.02-1.05) | N | N | Y | 74,115 | 823,995 | 0.98 |
| FAM13A   | rs576406049 | 4 | 89,857,291  | T | C | 0.130 | 0.130 | 1.6x10 <sup>-6</sup>  | 1.65 (1.35-2.03) | N | N | N | 67,914 | 802,131 | 0.63 |
| SMARCAD1 | rs6821438   | 4 | 95,091,911  | A | G | 53.4  | 46.6  | 4.0x10 <sup>-11</sup> | 1.04 (1.03-1.06) | N | Y | Y | 74,116 | 823,996 | 1.00 |
| SLC9B1   | rs1580278   | 4 | 104,140,848 | C | A | 47.3  | 47.3  | 2.2x10 <sup>-10</sup> | 1.04 (1.03-1.05) | N | Y | Y | 74,115 | 823,995 | 0.95 |
| PABPC4L  | rs1296328   | 4 | 137,083,193 | A | C | 44.6  | 44.6  | 3.5x10 <sup>-8</sup>  | 1.04 (1.02-1.05) | N | Y | Y | 74,116 | 823,995 | 0.97 |
| TMEM154  | rs7669833   | 4 | 153,513,369 | T | A | 70.5  | 29.6  | 1.2x10 <sup>-14</sup> | 1.06 (1.04-1.07) | N | N | Y | 74,116 | 823,997 | 0.99 |
| PDGFC    | rs28819812  | 4 | 157,652,753 | C | A | 67.7  | 32.3  | 2.2x10 <sup>-8</sup>  | 1.04 (1.03-1.06) | N | Y | Y | 62,667 | 545,622 | 1.00 |
| ACSL1    | rs58730668  | 4 | 185,717,759 | T | C | 85.8  | 14.2  | 1.3x10 <sup>-13</sup> | 1.07 (1.05-1.09) | N | N | Y | 74,117 | 823,997 | 1.00 |
| ANKH     | rs3845281   | 5 | 14,610,134  | G | A | 90.4  | 9.61  | 2.3x10 <sup>-11</sup> | 1.08 (1.06-1.10) | N | N | N | 74,117 | 823,997 | 0.99 |
| ANKH     | rs78408340  | 5 | 14,751,305  | C | T | 99.4  | 0.620 | 7.8x10 <sup>-13</sup> | 1.41 (1.28-1.55) | N | N | Y | 71,295 | 813,971 | 0.71 |
| ANKH     | rs17250977  | 5 | 14,753,745  | G | A | 3.76  | 3.76  | 2.0x10 <sup>-11</sup> | 1.12 (1.09-1.16) | N | N | N | 74,117 | 823,997 | 0.81 |
| ANKH     | rs6885132   | 5 | 14,768,092  | C | G | 90.4  | 9.60  | 1.7x10 <sup>-8</sup>  | 1.07 (1.04-1.09) | N | N | N | 74,117 | 823,997 | 0.97 |
| ANKH     | rs76549217  | 5 | 14,768,766  | T | C | 2.95  | 2.95  | 3.0x10 <sup>-10</sup> | 1.14 (1.10-1.19) | N | N | N | 74,117 | 823,997 | 0.73 |
| MRPS30   | rs62368490  | 5 | 44,534,364  | T | C | 3.13  | 3.13  | 3.4x10 <sup>-6</sup>  | 1.10 (1.06-1.14) | N | Y | N | 74,038 | 819,490 | 0.77 |
| MRPS30   | rs6884702   | 5 | 44,682,589  | G | A | 39.3  | 39.3  | 1.5x10 <sup>-10</sup> | 1.04 (1.03-1.06) | N | Y | Y | 74,037 | 819,490 | 0.99 |
| ITGA1    | rs17261179  | 5 | 51,791,225  | T | C | 51.7  | 48.3  | 1.3x10 <sup>-8</sup>  | 1.04 (1.02-1.05) | N | Y | N | 74,116 | 823,996 | 1.00 |
| ITGA1    | rs3811978   | 5 | 52,100,489  | G | A | 16.7  | 16.7  | 7.7x10 <sup>-11</sup> | 1.06 (1.04-1.07) | N | Y | Y | 74,116 | 823,996 | 1.00 |
| ITGA1    | rs62357230  | 5 | 52,315,682  | A | G | 3.39  | 3.39  | 5.9x10 <sup>-6</sup>  | 1.09 (1.05-1.13) | N | Y | N | 74,117 | 823,997 | 0.99 |
| ARL15    | rs62370480  | 5 | 52,774,510  | A | G | 22.0  | 22.0  | 2.0x10 <sup>-6</sup>  | 1.04 (1.02-1.05) | N | N | N | 74,116 | 823,997 | 0.99 |
| ARL15    | rs702634    | 5 | 53,271,420  | A | G | 69.0  | 31.0  | 7.7x10 <sup>-14</sup> | 1.05 (1.04-1.07) | N | N | Y | 74,116 | 823,997 | 1.00 |
| ARL15    | rs279744    | 5 | 53,412,620  | C | A | 69.1  | 30.9  | 3.1x10 <sup>-8</sup>  | 1.04 (1.03-1.05) | N | N | N | 74,117 | 823,997 | 1.00 |
| ANKRD55  | rs465002    | 5 | 55,808,475  | T | C | 74.2  | 25.8  | 6.1x10 <sup>-38</sup> | 1.11 (1.09-1.12) | N | N | Y | 74,115 | 823,995 | 0.99 |
| ANKRD55  | rs2431115   | 5 | 55,848,669  | A | G | 40.2  | 40.2  | 3.9x10 <sup>-10</sup> | 1.04 (1.03-1.06) | N | N | N | 74,115 | 823,995 | 0.99 |
| ANKRD55  | rs9687832   | 5 | 55,861,595  | A | G | 19.8  | 19.8  | 1.7x10 <sup>-20</sup> | 1.08 (1.06-1.10) | N | N | N | 74,117 | 823,997 | 0.99 |
| ANKRD55  | rs96844     | 5 | 56,196,604  | G | A | 26.2  | 26.2  | 5.4x10 <sup>-8</sup>  | 1.04 (1.03-1.05) | N | N | N | 74,116 | 823,995 | 1.00 |
| PIK3R1   | rs4976033   | 5 | 67,714,246  | G | A | 41.1  | 41.1  | 1.0x10 <sup>-9</sup>  | 1.05 (1.03-1.06) | Y | Y | Y | 50,401 | 523,887 | 0.96 |
| POC5     | rs2307111   | 5 | 75,003,678  | T | C | 60.5  | 39.5  | 2.1x10 <sup>-16</sup> | 1.05 (1.04-1.07) | N | N | Y | 74,117 | 823,997 | 1.00 |
| ZBED3    | rs4457053   | 5 | 76,424,949  | G | A | 30.4  | 30.4  | 8.4x10 <sup>-18</sup> | 1.06 (1.05-1.08) | N | N | Y | 74,115 | 823,995 | 0.96 |
| DMGDH    | rs1316776   | 5 | 78,430,607  | C | A | 64.8  | 35.2  | 2.6x10 <sup>-12</sup> | 1.05 (1.03-1.06) | N | Y | Y | 74,115 | 823,997 | 1.00 |
| RASA1    | rs7719891   | 5 | 86,577,352  | G | A | 25.9  | 25.9  | 2.4x10 <sup>-8</sup>  | 1.04 (1.03-1.06) | N | Y | Y | 74,117 | 823,997 | 0.99 |
| SLCO6A1  | rs138337556 | 5 | 101,232,944 | G | A | 0.360 | 0.360 | 4.7x10 <sup>-9</sup>  | 1.56 (1.34-1.81) | N | Y | Y | 52,854 | 778,536 | 0.57 |
| PAM      | rs78408340  | 5 | 102,338,739 | G | C | 0.830 | 0.830 | 2.1x10 <sup>-24</sup> | 1.47 (1.37-1.59) | N | N | N | 73,705 | 823,607 | 0.70 |
| PAM      | rs115505614 | 5 | 102,422,968 | T | C | 4.99  | 4.99  | 1.3x10 <sup>-30</sup> | 1.19 (1.15-1.22) | N | N | Y | 74,117 | 823,997 | 0.87 |

|            |             |   |             |   |   |        |        |                       |                  |   |   |   |        |         |      |
|------------|-------------|---|-------------|---|---|--------|--------|-----------------------|------------------|---|---|---|--------|---------|------|
| PHF15      | rs244665    | 5 | 133,414,622 | A | G | 70.3   | 29.7   | 9.9x10 <sup>-6</sup>  | 1.03 (1.02-1.05) | N | N | N | 74,115 | 823,995 | 0.98 |
| PHF15      | rs329122    | 5 | 133,864,599 | A | G | 42.9   | 42.9   | 3.6x10 <sup>-9</sup>  | 1.04 (1.03-1.05) | N | N | Y | 74,117 | 823,997 | 0.99 |
| EBF1       | rs3934712   | 5 | 157,928,196 | C | T | 20.6   | 20.6   | 3.2x10 <sup>-8</sup>  | 1.05 (1.03-1.07) | Y | Y | Y | 50,402 | 523,888 | 1.00 |
| RREB1      | rs112498319 | 6 | 7,035,734   | C | A | 40.9   | 40.9   | 4.2x10 <sup>-7</sup>  | 1.03 (1.02-1.05) | N | N | N | 74,116 | 823,996 | 1.00 |
| RREB1      | rs9379084   | 6 | 7,231,843   | G | A | 88.7   | 11.3   | 3.3x10 <sup>-21</sup> | 1.11 (1.08-1.13) | N | N | Y | 74,117 | 823,997 | 0.91 |
| RREB1      | rs9505097   | 6 | 7,255,650   | C | T | 79.9   | 20.1   | 8.6x10 <sup>-10</sup> | 1.05 (1.03-1.07) | N | N | N | 74,117 | 823,997 | 0.99 |
| CDKAL1     | rs7756992   | 6 | 20,679,709  | G | A | 27.4   | 27.4   | 2.4x10 <sup>-88</sup> | 1.15 (1.13-1.17) | N | N | Y | 74,117 | 823,997 | 1.00 |
| MHC        | rs601945    | 6 | 32,573,415  | G | A | 17.8   | 17.8   | 4.7x10 <sup>-9</sup>  | 1.06 (1.04-1.08) | N | N | Y | 74,038 | 819,490 | 0.88 |
| HMGA1      | rs77136196  | 6 | 34,247,047  | T | C | 4.20   | 4.20   | 1.6x10 <sup>-8</sup>  | 1.11 (1.07-1.16) | Y | Y | Y | 50,402 | 523,888 | 0.93 |
| HMGA1      | rs2233632   | 6 | 34,524,698  | T | C | 68.8   | 31.2   | 5.3x10 <sup>-7</sup>  | 1.04 (1.03-1.06) | Y | Y | N | 50,400 | 523,886 | 0.99 |
| LRFN2      | rs34298980  | 6 | 40,409,243  | T | C | 49.7   | 49.7   | 9.3x10 <sup>-10</sup> | 1.04 (1.03-1.05) | N | Y | Y | 74,115 | 823,995 | 0.89 |
| VEGFA      | rs11967262  | 6 | 43,760,327  | G | C | 48.6   | 48.6   | 8.8x10 <sup>-10</sup> | 1.04 (1.03-1.05) | N | N | N | 74,116 | 823,995 | 0.96 |
| VEGFA      | rs6458354   | 6 | 43,814,190  | C | T | 28.9   | 28.9   | 2.1x10 <sup>-12</sup> | 1.05 (1.04-1.07) | N | N | Y | 74,116 | 823,995 | 0.99 |
| TFAP2B     | rs3798519   | 6 | 50,788,778  | C | A | 18.4   | 18.4   | 2.6x10 <sup>-12</sup> | 1.06 (1.04-1.08) | N | N | Y | 74,117 | 823,997 | 1.00 |
| TFAP2B     | rs2465043   | 6 | 51,180,765  | G | A | 64.4   | 35.6   | 2.9x10 <sup>-6</sup>  | 1.03 (1.02-1.04) | N | N | N | 74,116 | 823,997 | 0.99 |
| SLC25A51P1 | rs555402748 | 6 | 67,387,490  | T | C | 0.0400 | 0.0400 | 4.6x10 <sup>-8</sup>  | 3.67 (2.30-5.86) | N | Y | Y | 45,657 | 492,696 | 0.55 |
| BEND3      | rs4946812   | 6 | 107,431,688 | G | A | 67.4   | 32.6   | 8.2x10 <sup>-9</sup>  | 1.04 (1.03-1.05) | N | Y | Y | 74,117 | 823,997 | 0.95 |
| CENPW      | rs11759026  | 6 | 126,792,095 | G | A | 23.2   | 23.2   | 2.4x10 <sup>-18</sup> | 1.07 (1.05-1.08) | N | N | Y | 74,117 | 823,997 | 0.97 |
| SOGA3      | rs2800733   | 6 | 127,416,930 | A | G | 71.7   | 28.4   | 6.0x10 <sup>-11</sup> | 1.05 (1.03-1.06) | N | Y | Y | 74,117 | 823,997 | 1.00 |
| SLC35D3    | rs9494624   | 6 | 137,300,960 | A | G | 29.0   | 29.0   | 6.1x10 <sup>-9</sup>  | 1.04 (1.03-1.06) | N | N | Y | 74,116 | 823,995 | 0.99 |
| MIR3668    | rs2982521   | 6 | 139,835,329 | A | T | 38.0   | 38.0   | 1.3x10 <sup>-9</sup>  | 1.05 (1.03-1.06) | Y | Y | Y | 50,402 | 523,887 | 1.00 |
| MIR3668    | rs616279    | 6 | 140,249,466 | A | G | 73.8   | 26.2   | 6.7x10 <sup>-7</sup>  | 1.04 (1.03-1.06) | Y | Y | N | 50,321 | 519,379 | 0.99 |
| SLC22A3    | rs474513    | 6 | 160,770,312 | A | G | 51.7   | 48.3   | 8.1x10 <sup>-10</sup> | 1.04 (1.03-1.05) | N | N | Y | 74,117 | 823,997 | 1.00 |
| QKI        | rs4709746   | 6 | 164,133,001 | C | T | 86.8   | 13.2   | 5.8x10 <sup>-9</sup>  | 1.06 (1.04-1.08) | N | Y | Y | 74,117 | 823,997 | 0.96 |
| DGKB       | rs17168486  | 7 | 14,898,282  | T | C | 18.1   | 18.1   | 2.3x10 <sup>-17</sup> | 1.07 (1.06-1.09) | N | N | N | 74,117 | 823,996 | 0.99 |
| DGKB       | rs10228066  | 7 | 15,063,569  | T | C | 53.7   | 46.3   | 1.1x10 <sup>-28</sup> | 1.07 (1.06-1.09) | N | N | Y | 74,116 | 823,995 | 1.00 |
| DGKB       | rs2908334   | 7 | 15,206,239  | T | C | 63.1   | 36.9   | 5.9x10 <sup>-6</sup>  | 1.03 (1.02-1.04) | N | N | N | 74,117 | 823,996 | 1.00 |
| IGF2BP3    | rs78840640  | 7 | 23,434,606  | G | C | 2.20   | 2.20   | 2.8x10 <sup>-6</sup>  | 1.11 (1.06-1.16) | N | Y | N | 74,117 | 823,997 | 0.94 |
| IGF2BP3    | rs4279506   | 7 | 23,512,896  | G | C | 61.0   | 39.0   | 4.8x10 <sup>-8</sup>  | 1.06 (1.04-1.08) | N | Y | Y | 74,116 | 823,997 | 0.96 |
| JAZF1      | rs1708302   | 7 | 28,198,677  | C | T | 51.2   | 48.8   | 1.1x10 <sup>-48</sup> | 1.10 (1.08-1.11) | N | N | Y | 74,116 | 823,996 | 1.00 |
| CRHR2      | rs917195    | 7 | 30,728,452  | C | T | 77.0   | 23.0   | 4.2x10 <sup>-11</sup> | 1.05 (1.04-1.07) | N | Y | Y | 74,117 | 823,997 | 0.94 |
| GCK        | rs878521    | 7 | 44,255,643  | A | G | 24.5   | 24.5   | 1.9x10 <sup>-13</sup> | 1.06 (1.04-1.07) | N | N | Y | 74,117 | 823,997 | 0.97 |
| GCK        | rs116913033 | 7 | 44,365,549  | C | T | 83.0   | 17.0   | 7.1x10 <sup>-6</sup>  | 1.04 (1.02-1.06) | N | N | N | 74,117 | 823,997 | 0.93 |
| FBXL13     | rs56376556  | 7 | 102,038,318 | T | C | 5.33   | 5.33   | 1.7x10 <sup>-6</sup>  | 1.08 (1.04-1.11) | N | Y | N | 74,117 | 823,997 | 0.84 |
| FBXL13     | rs11496066  | 7 | 102,486,254 | T | C | 81.8   | 18.2   | 1.1x10 <sup>-8</sup>  | 1.08 (1.05-1.11) | N | Y | Y | 74,117 | 823,997 | 1.00 |
| RELN       | rs62482405  | 7 | 102,987,583 | G | T | 8.19   | 8.19   | 6.9x10 <sup>-6</sup>  | 1.05 (1.03-1.08) | N | Y | N | 74,117 | 823,996 | 0.99 |
| RELN       | rs39328     | 7 | 103,444,978 | T | C | 43.3   | 43.3   | 3.7x10 <sup>-8</sup>  | 1.04 (1.02-1.05) | N | Y | Y | 74,117 | 823,997 | 1.00 |
| CTTNBP2    | rs6976111   | 7 | 117,495,667 | A | C | 31.3   | 31.3   | 1.2x10 <sup>-8</sup>  | 1.04 (1.03-1.06) | N | Y | Y | 62,668 | 545,622 | 0.98 |
| KLF14      | rs2268382   | 7 | 130,027,037 | C | A | 32.7   | 32.7   | 7.4x10 <sup>-6</sup>  | 1.03 (1.02-1.04) | N | N | N | 74,117 | 823,997 | 1.00 |
| KLF14      | rs1562396   | 7 | 130,457,914 | G | A | 31.9   | 31.9   | 9.9x10 <sup>-18</sup> | 1.06 (1.05-1.08) | N | N | Y | 74,116 | 823,997 | 0.92 |
| AOC1       | rs62492368  | 7 | 150,537,635 | A | G | 30.8   | 30.8   | 1.1x10 <sup>-10</sup> | 1.05 (1.03-1.06) | N | Y | Y | 74,117 | 823,997 | 0.99 |
| MNX1       | rs6459733   | 7 | 156,930,550 | G | C | 67.3   | 32.7   | 2.4x10 <sup>-17</sup> | 1.06 (1.05-1.07) | N | N | Y | 74,117 | 823,997 | 0.97 |
| MSRA       | rs17689007  | 8 | 9,974,824   | G | A | 53.3   | 46.7   | 2.5x10 <sup>-9</sup>  | 1.04 (1.03-1.05) | N | Y | Y | 74,037 | 819,490 | 1.00 |
| XKR6       | rs57327348  | 8 | 10,808,687  | A | T | 78.2   | 21.8   | 4.5x10 <sup>-8</sup>  | 1.04 (1.02-1.06) | N | Y | Y | 74,038 | 819,490 | 0.95 |
| LPL        | rs10096633  | 8 | 19,830,921  | C | T | 87.7   | 12.3   | 1.1x10 <sup>-12</sup> | 1.07 (1.05-1.09) | N | N | Y | 74,117 | 823,997 | 1.00 |
| PURG       | rs10954772  | 8 | 30,863,938  | T | C | 31.4   | 31.4   | 1.8x10 <sup>-9</sup>  | 1.04 (1.03-1.06) | N | Y | Y | 74,115 | 823,995 | 0.99 |
| ANK1       | rs13262861  | 8 | 41,508,577  | C | A | 82.9   | 17.1   | 4.0x10 <sup>-12</sup> | 1.07 (1.05-1.09) | N | N | Y | 74,117 | 823,997 | 0.97 |
| ANK1       | rs4736819   | 8 | 41,509,915  | T | C | 55.4   | 44.6   | 5.4x10 <sup>-7</sup>  | 1.04 (1.02-1.05) | N | N | N | 74,115 | 823,995 | 1.00 |
| ANK1       | rs148766658 | 8 | 41,552,046  | C | T | 3.78   | 3.78   | 5.7x10 <sup>-7</sup>  | 1.09 (1.05-1.13) | N | N | N | 74,117 | 823,997 | 0.97 |
| TP53INP1   | rs11786992  | 8 | 95,685,147  | A | C | 64.4   | 35.6   | 5.3x10 <sup>-6</sup>  | 1.03 (1.02-1.04) | N | N | N | 74,117 | 823,997 | 1.00 |
| TP53INP1   | rs10097617  | 8 | 95,961,626  | T | C | 48.5   | 48.5   | 3.3x10 <sup>-11</sup> | 1.04 (1.03-1.06) | N | N | Y | 74,117 | 823,996 | 1.00 |
| TP53INP1   | rs187936726 | 8 | 96,092,422  | G | A | 2.39   | 2.39   | 5.4x10 <sup>-6</sup>  | 1.11 (1.06-1.16) | N | N | N | 74,117 | 823,997 | 0.95 |
| CPQ        | rs149364428 | 8 | 97,737,741  | A | G | 1.04   | 1.04   | 1.8x10 <sup>-12</sup> | 1.27 (1.19-1.36) | N | Y | Y | 73,967 | 822,104 | 0.86 |
| TRHR       | rs12680028  | 8 | 110,123,183 | C | G | 53.4   | 46.6   | 2.5x10 <sup>-8</sup>  | 1.04 (1.02-1.05) | N | Y | Y | 74,117 | 823,997 | 1.00 |
| SLC30A8    | rs3802177   | 8 | 118,185,025 | G | A | 68.5   | 31.5   | 1.1x10 <sup>-35</sup> | 1.11 (1.10-1.13) | N | N | Y | 74,116 | 823,996 | 0.98 |
| SLC30A8    | rs80244329  | 8 | 118,404,672 | G | A | 97.8   | 2.19   | 6.9x10 <sup>-6</sup>  | 1.11 (1.06-1.17) | N | N | N | 74,117 | 823,997 | 0.75 |
| CASC11     | rs1772814   | 8 | 128,711,742 | G | A | 91.5   | 8.49   | 5.4x10 <sup>-10</sup> | 1.08 (1.05-1.11) | N | Y | Y | 74,117 | 823,997 | 0.77 |
| PVT1       | rs1561927   | 8 | 129,568,078 | C | T | 26.9   | 26.9   | 1.5x10 <sup>-9</sup>  | 1.04 (1.03-1.06) | N | Y | Y | 74,117 | 823,997 | 0.99 |
| BOP1       | rs4977213   | 8 | 145,507,304 | C | T | 37.5   | 37.5   | 9.1x10 <sup>-14</sup> | 1.05 (1.04-1.07) | N | Y | Y | 74,115 | 823,995 | 0.97 |
| BOP1       | rs12719778  | 8 | 145,879,883 | T | C | 53.8   | 46.2   | 5.0x10 <sup>-9</sup>  | 1.04 (1.03-1.05) | N | Y | N | 74,117 | 823,996 | 0.97 |
| GLIS3      | rs510807    | 9 | 3,965,689   | A | C | 49.1   | 49.1   | 1.4x10 <sup>-6</sup>  | 1.03 (1.02-1.04) | N | N | N | 74,115 | 823,995 | 0.98 |
| GLIS3      | rs79103584  | 9 | 4,243,045   | T | A | 98.6   | 1.38   | 4.4x10 <sup>-6</sup>  | 1.14 (1.08-1.21) | N | N | N | 74,117 | 823,996 | 0.98 |
| GLIS3      | rs10974438  | 9 | 4,291,928   | C | A | 35.7   | 35.7   | 1.5x10 <sup>-14</sup> | 1.05 (1.04-1.07) | N | N | Y | 74,116 | 823,997 | 0.98 |
| HAUS6      | rs7022807   | 9 | 19,067,833  | G | A | 40.1   | 40.1   | 2.7x10 <sup>-10</sup> | 1.04 (1.03-1.05) | N | Y | Y | 74,116 | 823,997 | 1.00 |
| FOCAD      | rs7867635   | 9 | 20,241,069  | C | T | 41.2   | 41.2   | 4.0x10 <sup>-8</sup>  | 1.04 (1.02-1.05) | N | Y | Y | 74,115 | 823,995 | 0.95 |
| FOCAD      | rs7847880   | 9 | 20,662,703  | C | T | 84.3   | 15.7   | 2.1x10 <sup>-6</sup>  | 1.04 (1.03-1.06) | N | Y | N | 74,115 | 823,995 | 0.98 |



|               |                 |    |             |   |   |        |        |                        |                  |   |   |   |        |         |      |
|---------------|-----------------|----|-------------|---|---|--------|--------|------------------------|------------------|---|---|---|--------|---------|------|
| CDKN2A/B      | rs1412830       | 9  | 22,043,612  | C | T | 62.8   | 37.2   | 9.1x10 <sup>-8</sup>   | 1.04 (1.02-1.05) | N | N | N | 74,117 | 823,995 | 0.97 |
| CDKN2A/B      | rs76011118      | 9  | 22,133,773  | A | G | 3.41   | 3.41   | 1.4x10 <sup>-7</sup>   | 1.11 (1.07-1.15) | N | N | N | 74,117 | 823,997 | 0.75 |
| CDKN2A/B      | rs10811660      | 9  | 22,134,068  | G | A | 82.8   | 17.2   | 1.4x10 <sup>-115</sup> | 1.27 (1.24-1.29) | N | N | Y | 74,117 | 823,997 | 0.98 |
| CDKN2A/B      | rs10757283      | 9  | 22,134,172  | T | C | 43.0   | 43.0   | 1.7x10 <sup>-41</sup>  | 1.11 (1.09-1.13) | N | N | N | 74,116 | 823,996 | 0.98 |
| CDKN2A/B      | rs1333052       | 9  | 22,157,908  | A | C | 66.0   | 34.0   | 6.3x10 <sup>-7</sup>   | 1.03 (1.02-1.05) | N | N | N | 74,116 | 823,997 | 0.99 |
| CDKN2A/B      | rs1575972       | 9  | 22,301,092  | T | A | 96.7   | 3.29   | 3.1x10 <sup>-7</sup>   | 1.10 (1.06-1.14) | N | N | N | 74,117 | 823,997 | 0.99 |
| LINGO2        | rs1412234       | 9  | 28,410,683  | C | T | 32.3   | 32.3   | 1.9x10 <sup>-10</sup>  | 1.04 (1.03-1.06) | N | Y | Y | 74,116 | 823,997 | 0.99 |
| UBAP2         | rs12001437      | 9  | 34,074,476  | C | T | 37.2   | 37.2   | 2.8x10 <sup>-10</sup>  | 1.04 (1.03-1.06) | N | Y | Y | 74,115 | 823,997 | 0.99 |
| MTND2P8       | rs11137820      | 9  | 81,359,113  | C | G | 57.5   | 42.5   | 2.9x10 <sup>-10</sup>  | 1.04 (1.02-1.05) | N | Y | Y | 74,116 | 823,996 | 0.99 |
| TLE4          | rs17791513      | 9  | 81,905,590  | A | G | 93.2   | 6.83   | 3.1x10 <sup>-14</sup>  | 1.10 (1.08-1.13) | N | N | Y | 74,117 | 823,997 | 0.98 |
| TLE1          | rs2796441       | 9  | 84,308,948  | G | A | 59.2   | 40.8   | 4.4x10 <sup>-24</sup>  | 1.07 (1.05-1.08) | N | N | Y | 74,116 | 823,997 | 0.98 |
| ZNF169        | rs55653563      | 9  | 97,001,682  | A | C | 73.2   | 26.8   | 2.2x10 <sup>-9</sup>   | 1.04 (1.03-1.06) | N | Y | Y | 74,117 | 823,997 | 0.98 |
| ZNF169        | rs12236906      | 9  | 97,497,494  | T | C | 98.7   | 1.28   | 3.4x10 <sup>-6</sup>   | 1.15 (1.08-1.22) | N | Y | N | 74,116 | 823,996 | 0.98 |
| ABO           | rs505922        | 9  | 136,149,229 | C | T | 33.2   | 33.2   | 3.9x10 <sup>-12</sup>  | 1.05 (1.03-1.06) | N | N | Y | 74,117 | 823,997 | 1.00 |
| GPSM1         | rs78403475      | 9  | 139,235,606 | G | C | 89.6   | 10.4   | 1.2x10 <sup>-6</sup>   | 1.06 (1.03-1.08) | N | N | N | 74,117 | 823,997 | 0.85 |
| GPSM1         | rs28505901      | 9  | 139,241,030 | G | A | 75.2   | 24.8   | 6.7x10 <sup>-26</sup>  | 1.09 (1.07-1.11) | N | N | Y | 67,154 | 810,074 | 0.83 |
| GPSM1         | rs11793035      | 9  | 139,507,212 | C | T | 33.1   | 33.1   | 2.2x10 <sup>-7</sup>   | 1.04 (1.02-1.05) | N | N | N | 67,154 | 810,073 | 0.86 |
| GPSM1         | 9:139737088:G:A | 9  | 139,737,088 | A | G | 0.0700 | 0.0700 | 7.9x10 <sup>-6</sup>   | 2.74 (1.76-4.25) | N | N | N | 31,447 | 464,429 | 0.62 |
| CDC123/CAMK1D | rs11257655      | 10 | 12,307,894  | T | C | 21.8   | 21.8   | 1.5x10 <sup>-32</sup>  | 1.09 (1.08-1.11) | N | N | Y | 74,117 | 823,997 | 0.99 |
| NEUROG3       | rs177045        | 10 | 71,321,279  | G | A | 31.6   | 31.6   | 6.6x10 <sup>-18</sup>  | 1.07 (1.05-1.08) | N | Y | N | 74,117 | 823,997 | 0.99 |
| NEUROG3       | rs61850200      | 10 | 71,321,658  | C | G | 27.7   | 27.7   | 7.3x10 <sup>-6</sup>   | 1.04 (1.02-1.05) | N | Y | N | 74,117 | 823,997 | 0.95 |
| NEUROG3       | rs41277236      | 10 | 71,332,301  | T | C | 4.31   | 4.31   | 1.5x10 <sup>-6</sup>   | 1.09 (1.05-1.12) | N | Y | N | 74,117 | 823,997 | 0.83 |
| NEUROG3       | rs549498088     | 10 | 71,347,311  | T | C | 0.600  | 0.600  | 4.7x10 <sup>-7</sup>   | 1.56 (1.31-1.86) | N | Y | N | 68,385 | 805,130 | 0.89 |
| NEUROG3       | rs2642588       | 10 | 71,466,578  | G | T | 70.2   | 29.8   | 2.2x10 <sup>-14</sup>  | 1.05 (1.04-1.07) | N | Y | Y | 74,117 | 823,997 | 0.99 |
| ZMIZ1         | rs703972        | 10 | 80,952,826  | G | C | 53.3   | 46.7   | 1.7x10 <sup>-29</sup>  | 1.07 (1.06-1.09) | N | N | Y | 74,117 | 823,996 | 0.99 |
| ZMIZ1         | rs1317617       | 10 | 81,096,589  | G | A | 79.8   | 20.2   | 1.8x10 <sup>-6</sup>   | 1.04 (1.02-1.06) | N | N | N | 74,117 | 823,997 | 0.97 |
| PTEN          | rs11202627      | 10 | 89,769,340  | T | C | 15.2   | 15.2   | 4.7x10 <sup>-8</sup>   | 1.06 (1.04-1.08) | Y | Y | Y | 50,402 | 523,888 | 1.00 |
| HHEX/IDE      | rs7078559       | 10 | 93,924,663  | T | C | 57.8   | 42.2   | 4.1x10 <sup>-7</sup>   | 1.03 (1.02-1.05) | N | N | N | 74,116 | 823,997 | 1.00 |
| HHEX/IDE      | rs10882101      | 10 | 94,462,427  | T | C | 58.7   | 41.3   | 1.4x10 <sup>-8</sup>   | 1.06 (1.04-1.08) | N | N | Y | 74,116 | 823,997 | 1.00 |
| HHEX/IDE      | rs1112718       | 10 | 94,479,107  | A | G | 59.8   | 40.2   | 5.0x10 <sup>-7</sup>   | 1.06 (1.03-1.08) | N | N | N | 74,117 | 823,996 | 1.00 |
| TCF7L2        | rs536643418     | 10 | 114,699,835 | G | C | 0.520  | 0.520  | 2.6x10 <sup>-8</sup>   | 1.50 (1.30-1.73) | N | N | N | 70,881 | 810,159 | 0.66 |
| TCF7L2        | rs140242150     | 10 | 114,702,962 | A | G | 0.500  | 0.500  | 2.2x10 <sup>-8</sup>   | 1.36 (1.22-1.52) | N | N | N | 70,758 | 813,597 | 0.59 |
| TCF7L2        | rs7918400       | 10 | 114,703,136 | T | C | 47.6   | 47.6   | 2.0x10 <sup>-15</sup>  | 1.06 (1.04-1.07) | N | N | N | 74,117 | 823,995 | 0.98 |
| TCF7L2        | rs184509201     | 10 | 114,740,337 | C | G | 98.2   | 1.82   | 1.2x10 <sup>-13</sup>  | 1.21 (1.15-1.27) | N | N | N | 74,117 | 823,997 | 0.91 |
| TCF7L2        | rs180988137     | 10 | 114,751,173 | G | A | 1.04   | 1.04   | 6.1x10 <sup>-6</sup>   | 1.17 (1.09-1.25) | N | N | N | 74,117 | 823,997 | 0.73 |
| TCF7L2        | rs7903146       | 10 | 114,758,349 | C | T | 70.6   | 29.5   | 5.8x10 <sup>-447</sup> | 1.37 (1.35-1.39) | N | N | Y | 74,116 | 823,996 | 0.99 |
| TCF7L2        | rs78025551      | 10 | 114,757,956 | C | G | 85.1   | 14.9   | 1.6x10 <sup>-7</sup>   | 1.05 (1.03-1.07) | N | N | N | 74,117 | 823,997 | 0.98 |
| TCF7L2        | rs34855922      | 10 | 114,871,594 | A | G | 71.6   | 28.4   | 5.5x10 <sup>-12</sup>  | 1.05 (1.04-1.07) | N | N | N | 74,117 | 823,997 | 0.91 |
| WDR11         | rs72631105      | 10 | 122,915,345 | A | G | 19.0   | 19.0   | 3.7x10 <sup>-9</sup>   | 1.06 (1.04-1.08) | Y | Y | Y | 50,402 | 523,888 | 0.88 |
| PLEKHA1       | rs2280141       | 10 | 124,193,181 | T | G | 51.6   | 48.4   | 1.4x10 <sup>-13</sup>  | 1.05 (1.03-1.06) | N | N | Y | 74,116 | 823,996 | 1.00 |
| INS/IGF2      | rs12802972      | 11 | 1,704,596   | A | G | 42.8   | 42.8   | 1.5x10 <sup>-6</sup>   | 1.03 (1.02-1.05) | N | N | N | 74,115 | 823,997 | 0.96 |
| INS/IGF2      | rs11042596      | 11 | 2,118,860   | G | T | 66.5   | 33.5   | 2.0x10 <sup>-8</sup>   | 1.04 (1.03-1.05) | N | N | N | 74,115 | 823,995 | 0.93 |
| INS/IGF2      | rs555759341     | 11 | 2,151,761   | C | G | 0.490  | 0.490  | 3.6x10 <sup>-8</sup>   | 1.38 (1.23-1.55) | N | N | N | 69,523 | 804,881 | 0.76 |
| INS/IGF2      | rs571342427     | 11 | 2,182,519   | C | T | 0.150  | 0.150  | 1.0x10 <sup>-6</sup>   | 1.68 (1.36-2.07) | N | N | N | 64,480 | 793,265 | 0.69 |
| INS/IGF2      | rs4929965       | 11 | 2,197,286   | A | G | 38.3   | 38.3   | 4.0x10 <sup>-26</sup>  | 1.07 (1.06-1.09) | N | N | Y | 74,115 | 823,996 | 0.89 |
| KCNQ1         | rs4930091       | 11 | 2,372,356   | C | T | 75.9   | 24.1   | 3.7x10 <sup>-6</sup>   | 1.04 (1.02-1.05) | N | N | N | 74,115 | 823,995 | 0.97 |
| KCNQ1         | rs2283164       | 11 | 2,579,163   | A | G | 94.7   | 5.32   | 1.2x10 <sup>-7</sup>   | 1.08 (1.05-1.12) | N | N | N | 74,117 | 823,997 | 0.88 |
| KCNQ1         | rs80102379      | 11 | 2,634,177   | G | T | 98.2   | 1.78   | 9.3x10 <sup>-8</sup>   | 1.15 (1.09-1.21) | N | N | N | 74,117 | 823,997 | 0.80 |
| KCNQ1         | rs231349        | 11 | 2,672,821   | T | C | 10.2   | 10.2   | 2.3x10 <sup>-11</sup>  | 1.07 (1.05-1.10) | N | N | N | 74,117 | 823,997 | 0.96 |
| KCNQ1         | rs231361        | 11 | 2,691,500   | A | G | 25.6   | 25.6   | 5.0x10 <sup>-25</sup>  | 1.08 (1.07-1.10) | N | N | N | 74,117 | 823,997 | 0.96 |
| KCNQ1         | rs2283220       | 11 | 2,755,548   | A | G | 69.0   | 31.0   | 1.4x10 <sup>-9</sup>   | 1.05 (1.03-1.06) | N | N | N | 74,117 | 823,997 | 0.93 |
| KCNQ1         | rs234853        | 11 | 2,850,828   | G | A | 24.8   | 24.8   | 6.8x10 <sup>-16</sup>  | 1.08 (1.06-1.10) | N | N | N | 74,116 | 823,996 | 0.97 |
| KCNQ1         | rs2237895       | 11 | 2,857,194   | C | A | 42.6   | 42.6   | 6.0x10 <sup>-52</sup>  | 1.12 (1.11-1.14) | N | N | Y | 74,116 | 823,996 | 0.94 |
| KCNQ1         | rs2237897       | 11 | 2,858,546   | C | T | 95.4   | 4.57   | 8.4x10 <sup>-32</sup>  | 1.23 (1.19-1.27) | N | N | N | 74,117 | 823,997 | 0.93 |
| KCNQ1         | rs445084        | 11 | 2,908,754   | G | A | 36.1   | 36.1   | 1.7x10 <sup>-6</sup>   | 1.03 (1.02-1.05) | N | N | N | 74,115 | 823,996 | 0.96 |
| PDE3B         | rs141521721     | 11 | 14,763,828  | A | C | 2.36   | 2.36   | 2.7x10 <sup>-8</sup>   | 1.13 (1.08-1.17) | N | Y | Y | 74,117 | 823,997 | 0.96 |
| KCNJ11        | rs5213          | 11 | 17,408,404  | C | T | 36.2   | 36.2   | 3.5x10 <sup>-27</sup>  | 1.07 (1.06-1.09) | N | N | Y | 74,115 | 823,995 | 0.99 |
| KCNJ11        | rs67254669      | 11 | 17,470,143  | G | A | 0.110  | 0.110  | 1.1x10 <sup>-8</sup>   | 1.89 (1.52-2.35) | N | N | N | 55,757 | 521,088 | 0.82 |
| METTL15       | rs4923543       | 11 | 28,534,898  | A | G | 33.2   | 33.2   | 4.5x10 <sup>-8</sup>   | 1.04 (1.03-1.06) | Y | Y | Y | 50,400 | 523,886 | 1.00 |
| QSER1         | rs7943101       | 11 | 32,460,873  | T | C | 16.1   | 16.1   | 8.5x10 <sup>-6</sup>   | 1.04 (1.02-1.06) | N | Y | N | 74,117 | 823,997 | 0.99 |
| QSER1         | rs145678014     | 11 | 32,927,778  | G | T | 95.7   | 4.33   | 2.0x10 <sup>-10</sup>  | 1.11 (1.07-1.14) | N | Y | Y | 74,117 | 823,997 | 0.94 |
| QSER1         | rs528122639     | 11 | 33,091,735  | A | G | 0.0900 | 0.0900 | 1.6x10 <sup>-7</sup>   | 2.09 (1.59-2.76) | N | Y | N | 62,871 | 788,941 | 0.69 |
| PDHX          | rs286925        | 11 | 34,642,668  | A | G | 18.2   | 18.2   | 5.0x10 <sup>-6</sup>   | 1.04 (1.02-1.06) | N | Y | N | 74,116 | 823,996 | 0.99 |
| PDHX          | rs2767036       | 11 | 34,982,148  | C | A | 29.1   | 29.1   | 3.3x10 <sup>-8</sup>   | 1.04 (1.02-1.05) | N | Y | Y | 74,115 | 823,996 | 1.00 |
| HSD17B12      | rs1061810       | 11 | 43,877,934  | A | C | 28.8   | 28.8   | 6.0x10 <sup>-13</sup>  | 1.05 (1.04-1.07) | N | N | Y | 74,117 | 823,997 | 0.99 |
| CRY2          | rs7115753       | 11 | 45,912,013  | A | G | 44.9   | 44.9   | 3.8x10 <sup>-9</sup>   | 1.04 (1.03-1.05) | N | Y | Y | 74,115 | 823,995 | 0.98 |

|                     |             |    |             |   |   |        |        |                       |                  |   |   |   |        |         |      |
|---------------------|-------------|----|-------------|---|---|--------|--------|-----------------------|------------------|---|---|---|--------|---------|------|
| <i>CELF1</i>        | rs7124681   | 11 | 47,529,947  | A | C | 41.0   | 41.0   | 5.1x10 <sup>-9</sup>  | 1.04 (1.03-1.05) | N | Y | Y | 74,038 | 819,490 | 1.00 |
| <i>MAP3K11</i>      | rs1783541   | 11 | 65,294,799  | T | C | 20.4   | 20.4   | 2.0x10 <sup>-14</sup> | 1.06 (1.05-1.08) | N | N | Y | 74,116 | 823,996 | 0.98 |
| <i>CCND1</i>        | rs61881115  | 11 | 68,997,225  | G | A | 83.8   | 16.2   | 4.1x10 <sup>-7</sup>  | 1.05 (1.03-1.06) | N | Y | N | 74,117 | 823,996 | 0.97 |
| <i>CCND1</i>        | rs11820019  | 11 | 69,448,758  | T | C | 97.3   | 2.67   | 5.1x10 <sup>-12</sup> | 1.16 (1.11-1.20) | N | Y | Y | 74,117 | 823,997 | 0.88 |
| <i>CENTD2/ARAP1</i> | rs77464186  | 11 | 72,460,398  | A | C | 83.6   | 16.4   | 4.7x10 <sup>-33</sup> | 1.11 (1.09-1.13) | N | N | Y | 74,116 | 823,997 | 0.99 |
| <i>MTNR1B</i>       | rs10830963  | 11 | 92,708,710  | G | C | 27.7   | 27.7   | 4.8x10 <sup>-43</sup> | 1.10 (1.09-1.12) | N | N | Y | 74,117 | 823,996 | 0.97 |
| <i>MTNR1B</i>       | rs57235767  | 11 | 93,013,531  | C | T | 70.6   | 29.4   | 5.9x10 <sup>-10</sup> | 1.04 (1.03-1.06) | N | N | N | 74,117 | 823,996 | 0.99 |
| <i>ETS1</i>         | rs10893829  | 11 | 128,042,575 | T | C | 85.3   | 14.7   | 1.3x10 <sup>-10</sup> | 1.06 (1.04-1.08) | N | Y | N | 74,117 | 823,997 | 1.00 |
| <i>ETS1</i>         | rs10750397  | 11 | 128,234,144 | A | G | 28.2   | 28.2   | 8.3x10 <sup>-13</sup> | 1.05 (1.04-1.07) | N | Y | N | 74,117 | 823,996 | 1.00 |
| <i>ETS1</i>         | rs67232546  | 11 | 128,398,938 | T | C | 20.7   | 20.7   | 1.3x10 <sup>-11</sup> | 1.06 (1.04-1.07) | N | Y | Y | 74,117 | 823,997 | 0.98 |
| <i>ETS1</i>         | rs112595469 | 11 | 128,583,975 | T | C | 2.84   | 2.84   | 6.2x10 <sup>-6</sup>  | 1.10 (1.05-1.14) | N | Y | N | 74,117 | 823,997 | 0.88 |
| <i>CCND2</i>        | rs10848958  | 12 | 4,031,104   | C | T | 80.4   | 19.6   | 1.5x10 <sup>-7</sup>  | 1.04 (1.03-1.06) | N | N | N | 74,117 | 823,997 | 0.94 |
| <i>CCND2</i>        | rs11063028  | 12 | 4,300,172   | C | T | 18.0   | 18.0   | 8.5x10 <sup>-11</sup> | 1.06 (1.04-1.07) | N | N | N | 74,116 | 823,997 | 1.00 |
| <i>CCND2</i>        | rs4238013   | 12 | 4,376,089   | C | T | 20.9   | 20.9   | 3.2x10 <sup>-11</sup> | 1.06 (1.04-1.07) | N | N | N | 74,115 | 823,995 | 0.94 |
| <i>CCND2</i>        | rs3217792   | 12 | 4,384,696   | C | T | 91.3   | 8.69   | 2.6x10 <sup>-21</sup> | 1.12 (1.10-1.15) | N | N | N | 74,117 | 823,997 | 0.85 |
| <i>CCND2</i>        | rs76895963  | 12 | 4,384,844   | T | G | 98.0   | 1.98   | 1.4x10 <sup>-69</sup> | 1.62 (1.54-1.71) | N | N | Y | 74,117 | 823,997 | 0.72 |
| <i>CCND2</i>        | rs3217860   | 12 | 4,399,050   | G | A | 25.8   | 25.8   | 3.9x10 <sup>-9</sup>  | 1.05 (1.03-1.06) | N | N | N | 74,117 | 823,997 | 0.94 |
| <i>CDKN1B</i>       | rs2066827   | 12 | 12,871,099  | G | T | 23.5   | 23.5   | 4.2x10 <sup>-8</sup>  | 1.05 (1.03-1.06) | N | Y | Y | 74,116 | 823,996 | 0.78 |
| <i>ITPR2</i>        | rs178314    | 12 | 26,453,283  | G | A | 25.3   | 25.3   | 8.4x10 <sup>-11</sup> | 1.05 (1.03-1.06) | N | Y | Y | 74,117 | 823,997 | 1.00 |
| <i>KLHDC5</i>       | rs10842994  | 12 | 27,965,150  | C | T | 80.5   | 19.5   | 4.1x10 <sup>-20</sup> | 1.08 (1.06-1.09) | N | N | Y | 74,117 | 823,997 | 0.99 |
| <i>HMGA2</i>        | rs2258238   | 12 | 66,221,060  | T | A | 10.4   | 10.4   | 4.5x10 <sup>-21</sup> | 1.10 (1.08-1.13) | N | N | Y | 74,117 | 823,997 | 0.99 |
| <i>HMGA2</i>        | rs1042725   | 12 | 66,358,347  | T | C | 49.0   | 49.0   | 1.8x10 <sup>-13</sup> | 1.05 (1.03-1.06) | N | N | N | 74,116 | 823,996 | 1.00 |
| <i>TSPAN8/LGR5</i>  | rs1796330   | 12 | 71,522,953  | G | C | 57.1   | 42.9   | 2.2x10 <sup>-14</sup> | 1.05 (1.04-1.06) | N | N | Y | 74,117 | 823,996 | 1.00 |
| <i>USP44</i>        | rs2197973   | 12 | 95,928,560  | T | C | 53.8   | 46.3   | 3.6x10 <sup>-8</sup>  | 1.04 (1.02-1.05) | N | Y | Y | 74,115 | 823,996 | 1.00 |
| <i>RMST</i>         | rs75911467  | 12 | 97,562,756  | A | G | 0.0300 | 0.0300 | 1.7x10 <sup>-6</sup>  | 3.07 (1.94-4.85) | N | Y | N | 47,869 | 741,820 | 0.81 |
| <i>RMST</i>         | rs557027608 | 12 | 97,779,248  | A | G | 0.0600 | 0.0600 | 2.7x10 <sup>-7</sup>  | 2.34 (1.69-3.24) | N | Y | N | 42,508 | 733,542 | 0.88 |
| <i>RMST</i>         | rs77864822  | 12 | 97,848,775  | A | G | 93.2   | 6.76   | 1.1x10 <sup>-8</sup>  | 1.08 (1.05-1.11) | N | Y | Y | 74,117 | 823,997 | 0.97 |
| <i>WSCD2</i>        | rs1426371   | 12 | 108,629,780 | G | A | 73.9   | 26.1   | 8.2x10 <sup>-12</sup> | 1.05 (1.04-1.07) | N | N | Y | 74,117 | 823,997 | 0.95 |
| <i>KSR2</i>         | rs34965774  | 12 | 118,412,373 | A | G | 14.4   | 14.4   | 2.0x10 <sup>-9</sup>  | 1.06 (1.04-1.08) | N | Y | Y | 74,117 | 823,997 | 0.98 |
| <i>KSR2</i>         | rs12578639  | 12 | 118,489,636 | A | T | 82.8   | 17.2   | 2.2x10 <sup>-6</sup>  | 1.04 (1.02-1.06) | N | Y | N | 74,117 | 823,997 | 0.97 |
| <i>HNF1A</i>        | rs11065299  | 12 | 121,297,815 | A | G | 7.54   | 7.54   | 5.8x10 <sup>-7</sup>  | 1.06 (1.04-1.09) | N | N | N | 74,117 | 823,997 | 0.96 |
| <i>HNF1A</i>        | rs73226260  | 12 | 121,380,541 | G | A | 96.7   | 3.31   | 5.9x10 <sup>-11</sup> | 1.13 (1.09-1.17) | N | N | N | 74,117 | 823,997 | 0.96 |
| <i>HNF1A</i>        | rs1800574   | 12 | 121,416,864 | T | C | 2.96   | 2.96   | 1.7x10 <sup>-12</sup> | 1.14 (1.10-1.19) | N | N | N | 74,117 | 823,997 | 0.94 |
| <i>HNF1A</i>        | rs56348580  | 12 | 121,432,117 | G | C | 68.9   | 31.1   | 2.3x10 <sup>-13</sup> | 1.05 (1.04-1.07) | N | N | Y | 74,117 | 823,997 | 0.99 |
| <i>HNF1A</i>        | rs28638142  | 12 | 121,501,461 | A | C | 4.42   | 4.42   | 2.9x10 <sup>-6</sup>  | 1.08 (1.04-1.11) | N | N | N | 74,117 | 823,997 | 0.95 |
| <i>HNF1A</i>        | rs73224262  | 12 | 121,882,395 | T | C | 0.680  | 0.680  | 9.1x10 <sup>-7</sup>  | 1.24 (1.14-1.34) | N | N | N | 74,117 | 823,997 | 0.75 |
| <i>MPHOSPH9</i>     | rs4148856   | 12 | 123,450,765 | C | G | 78.1   | 21.9   | 1.7x10 <sup>-10</sup> | 1.05 (1.03-1.07) | N | N | Y | 74,115 | 823,995 | 0.99 |
| <i>ZNF664</i>       | rs7978610   | 12 | 124,468,572 | G | C | 66.6   | 33.5   | 2.0x10 <sup>-8</sup>  | 1.27 (1.17-1.38) | Y | Y | Y | 50,400 | 523,888 | 1.00 |
| <i>ZNF664</i>       | rs825452    | 12 | 124,509,177 | A | G | 60.3   | 39.7   | 2.4x10 <sup>-6</sup>  | 1.04 (1.02-1.05) | Y | Y | N | 50,400 | 523,887 | 0.99 |
| <i>FBRS1</i>        | rs12811407  | 12 | 133,069,698 | A | G | 33.1   | 33.1   | 1.7x10 <sup>-12</sup> | 1.05 (1.04-1.07) | N | Y | Y | 74,117 | 823,996 | 0.92 |
| <i>RNF6</i>         | rs34584161  | 13 | 26,776,999  | A | G | 76.0   | 24.0   | 2.2x10 <sup>-10</sup> | 1.05 (1.03-1.06) | N | N | Y | 74,117 | 823,997 | 0.97 |
| <i>HMGB1</i>        | rs11842871  | 13 | 31,042,452  | G | T | 73.5   | 26.6   | 1.2x10 <sup>-8</sup>  | 1.04 (1.03-1.06) | N | Y | Y | 74,117 | 823,997 | 0.96 |
| <i>KL</i>           | rs576674    | 13 | 33,554,302  | G | A | 16.9   | 16.9   | 8.3x10 <sup>-10</sup> | 1.05 (1.04-1.07) | N | N | Y | 74,117 | 823,997 | 0.99 |
| <i>DLEU1</i>        | rs963740    | 13 | 51,096,095  | A | T | 71.3   | 28.7   | 2.1x10 <sup>-8</sup>  | 1.04 (1.03-1.05) | N | Y | Y | 74,117 | 823,996 | 1.00 |
| <i>PCDH17</i>       | rs9537803   | 13 | 58,366,634  | C | T | 27.7   | 27.7   | 4.6x10 <sup>-8</sup>  | 1.04 (1.03-1.06) | N | Y | Y | 74,115 | 823,996 | 1.00 |
| <i>PCDH17</i>       | rs9569864   | 13 | 58,965,435  | C | T | 82.5   | 17.5   | 8.7x10 <sup>-8</sup>  | 1.05 (1.03-1.06) | N | Y | N | 74,115 | 823,997 | 1.00 |
| <i>SRGAP2D</i>      | rs9563615   | 13 | 59,077,406  | A | T | 71.0   | 29.0   | 6.4x10 <sup>-11</sup> | 1.05 (1.03-1.06) | N | Y | Y | 74,117 | 823,997 | 1.00 |
| <i>SRGAP2D</i>      | rs76251711  | 13 | 59,184,234  | G | A | 1.26   | 1.26   | 2.3x10 <sup>-6</sup>  | 1.16 (1.09-1.23) | N | Y | N | 73,705 | 823,607 | 0.87 |
| <i>SPRY2</i>        | rs1359790   | 13 | 80,717,156  | G | A | 72.0   | 28.0   | 2.4x10 <sup>-31</sup> | 1.09 (1.07-1.10) | N | N | Y | 74,116 | 823,997 | 1.00 |
| <i>IRS2</i>         | rs7987740   | 13 | 109,947,213 | T | C | 60.9   | 39.1   | 4.0x10 <sup>-8</sup>  | 1.04 (1.02-1.05) | N | Y | Y | 74,116 | 823,996 | 1.00 |
| <i>IRS2</i>         | rs4771648   | 13 | 110,431,626 | G | A | 66.9   | 33.2   | 8.9x10 <sup>-8</sup>  | 1.04 (1.02-1.05) | N | Y | N | 74,117 | 823,997 | 0.99 |
| <i>SLC7A7</i>       | rs17122772  | 14 | 23,288,935  | G | C | 22.8   | 22.8   | 1.6x10 <sup>-8</sup>  | 1.04 (1.03-1.06) | N | Y | Y | 74,117 | 823,997 | 0.91 |
| <i>AKAP6</i>        | rs17522122  | 14 | 33,302,882  | T | G | 47.4   | 47.4   | 3.2x10 <sup>-9</sup>  | 1.04 (1.03-1.05) | N | Y | Y | 74,116 | 823,995 | 0.98 |
| <i>CLEC14A</i>      | rs8017808   | 14 | 38,848,419  | G | T | 74.3   | 25.7   | 2.1x10 <sup>-8</sup>  | 1.04 (1.03-1.06) | N | Y | Y | 74,117 | 823,997 | 0.99 |
| <i>NRXN3</i>        | rs17836088  | 14 | 79,932,041  | C | G | 21.7   | 21.7   | 6.7x10 <sup>-14</sup> | 1.06 (1.04-1.08) | N | N | Y | 74,116 | 823,997 | 1.00 |
| <i>SMEK1</i>        | rs8010382   | 14 | 91,963,722  | G | A | 42.1   | 42.1   | 6.5x10 <sup>-9</sup>  | 1.04 (1.03-1.05) | N | Y | Y | 74,117 | 823,996 | 0.94 |
| <i>MARK3</i>        | rs62007683  | 14 | 103,894,071 | G | T | 65.3   | 34.7   | 3.1x10 <sup>-8</sup>  | 1.04 (1.02-1.05) | N | Y | Y | 74,116 | 823,996 | 1.00 |
| <i>RASGRP1</i>      | rs8032939   | 15 | 38,834,033  | C | T | 24.6   | 24.6   | 3.5x10 <sup>-14</sup> | 1.06 (1.04-1.07) | N | N | N | 74,116 | 823,997 | 0.99 |
| <i>RASGRP1</i>      | rs34715063  | 15 | 38,873,115  | C | T | 12.4   | 12.4   | 2.3x10 <sup>-19</sup> | 1.10 (1.07-1.12) | N | N | Y | 74,117 | 823,997 | 0.89 |
| <i>LTK</i>          | rs11070332  | 15 | 41,809,205  | A | G | 35.8   | 35.8   | 1.1x10 <sup>-13</sup> | 1.05 (1.04-1.06) | N | Y | Y | 74,117 | 823,995 | 0.98 |
| <i>LTK</i>          | rs543786825 | 15 | 42,201,410  | T | C | 0.0400 | 0.0400 | 4.7x10 <sup>-6</sup>  | 3.15 (1.93-5.15) | N | Y | N | 45,873 | 756,610 | 0.75 |
| <i>ONECUT1</i>      | rs2456530   | 15 | 53,091,553  | T | C | 12.7   | 12.7   | 5.4x10 <sup>-9</sup>  | 1.06 (1.04-1.08) | N | Y | Y | 74,117 | 823,997 | 0.98 |
| <i>WDR72</i>        | rs528350911 | 15 | 53,747,228  | G | C | 0.680  | 0.680  | 2.1x10 <sup>-8</sup>  | 1.27 (1.17-1.38) | N | Y | Y | 74,117 | 823,997 | 0.75 |
| <i>TCF12</i>        | rs117483894 | 15 | 57,456,802  | G | A | 3.69   | 3.69   | 3.9x10 <sup>-8</sup>  | 1.10 (1.06-1.13) | N | Y | Y | 74,115 | 823,996 | 0.99 |
| <i>C2CD4A/B</i>     | rs8037894   | 15 | 62,394,264  | G | C | 56.6   | 43.4   | 2.6x10 <sup>-13</sup> | 1.05 (1.03-1.06) | N | N | Y | 74,115 | 823,996 | 1.00 |
| <i>USP3</i>         | rs7178762   | 15 | 63,871,292  | C | T | 46.0   | 46.0   | 5.4x10 <sup>-10</sup> | 1.04 (1.03-1.05) | N | Y | Y | 74,117 | 823,997 | 1.00 |

|             |             |    |            |   |   |        |        |                       |                  |   |   |   |        |         |      |
|-------------|-------------|----|------------|---|---|--------|--------|-----------------------|------------------|---|---|---|--------|---------|------|
| MAP2K5      | rs4776970   | 15 | 68,080,886 | A | T | 64.1   | 35.9   | 5.0x10 <sup>-9</sup>  | 1.04 (1.03-1.05) | N | Y | Y | 74,117 | 823,997 | 1.00 |
| PTPN9       | rs13737     | 15 | 75,932,129 | G | T | 75.9   | 24.1   | 5.6x10 <sup>-10</sup> | 1.05 (1.03-1.06) | N | N | Y | 74,117 | 823,997 | 0.98 |
| HMG20A      | rs1005752   | 15 | 77,818,128 | A | C | 71.5   | 28.5   | 2.5x10 <sup>-10</sup> | 1.08 (1.07-1.10) | N | N | Y | 74,115 | 823,995 | 0.99 |
| AP3S2       | rs4932265   | 15 | 90,423,293 | T | C | 26.7   | 26.7   | 4.2x10 <sup>-20</sup> | 1.07 (1.05-1.08) | N | N | Y | 74,115 | 823,995 | 0.99 |
| PRC1        | rs12910825  | 15 | 91,511,260 | G | A | 36.1   | 36.1   | 1.6x10 <sup>-15</sup> | 1.05 (1.04-1.07) | N | N | Y | 74,116 | 823,995 | 0.99 |
| ITFG3       | rs6600191   | 16 | 295,795    | T | C | 82.5   | 17.5   | 9.3x10 <sup>-13</sup> | 1.06 (1.05-1.08) | N | N | Y | 74,117 | 823,997 | 1.00 |
| CLUAP1      | rs3751837   | 16 | 3,583,173  | T | C | 22.0   | 22.0   | 1.4x10 <sup>-8</sup>  | 1.04 (1.03-1.06) | N | Y | Y | 74,115 | 823,997 | 0.98 |
| ATP2A1      | rs8046545   | 16 | 28,915,217 | G | A | 35.9   | 35.9   | 1.9x10 <sup>-9</sup>  | 1.04 (1.02-1.05) | N | Y | Y | 74,115 | 823,995 | 0.98 |
| FAM57B      | rs11642430  | 16 | 30,045,789 | G | C | 39.9   | 39.9   | 2.2x10 <sup>-9</sup>  | 1.04 (1.03-1.05) | N | Y | Y | 74,116 | 823,996 | 0.99 |
| FAM57B      | rs199795270 | 16 | 30,419,384 | C | G | 0.650  | 0.650  | 1.2x10 <sup>-6</sup>  | 1.25 (1.14-1.36) | N | Y | N | 72,819 | 821,143 | 0.75 |
| FTO         | rs4281707   | 16 | 53,501,946 | G | A | 54.4   | 45.6   | 3.2x10 <sup>-10</sup> | 1.04 (1.03-1.05) | N | N | N | 74,117 | 823,997 | 0.99 |
| FTO         | rs78020297  | 16 | 53,758,720 | A | G | 5.17   | 5.17   | 6.5x10 <sup>-9</sup>  | 1.09 (1.06-1.12) | N | N | N | 74,117 | 823,997 | 0.95 |
| FTO         | rs1421085   | 16 | 53,800,954 | C | T | 41.5   | 41.5   | 3.1x10 <sup>-84</sup> | 1.13 (1.12-1.15) | N | N | Y | 74,116 | 823,997 | 1.00 |
| NFAT5       | rs862320    | 16 | 69,651,866 | C | T | 57.8   | 42.2   | 3.9x10 <sup>-11</sup> | 1.04 (1.03-1.06) | N | N | Y | 74,116 | 823,996 | 1.00 |
| BCAR1       | rs72802342  | 16 | 75,234,872 | C | A | 92.3   | 7.69   | 4.0x10 <sup>-32</sup> | 1.17 (1.14-1.20) | N | N | Y | 74,117 | 823,997 | 0.95 |
| BCAR1       | rs3115960   | 16 | 75,516,534 | G | C | 37.0   | 37.0   | 2.8x10 <sup>-6</sup>  | 1.03 (1.02-1.05) | N | N | N | 74,115 | 823,995 | 0.96 |
| CMIP        | rs2925979   | 16 | 81,534,790 | T | C | 30.0   | 30.0   | 1.4x10 <sup>-14</sup> | 1.05 (1.04-1.07) | N | N | Y | 74,117 | 823,997 | 0.99 |
| SPG7        | rs12920022  | 16 | 89,564,055 | A | T | 15.8   | 15.8   | 3.4x10 <sup>-9</sup>  | 1.05 (1.04-1.07) | N | Y | Y | 74,117 | 823,997 | 0.94 |
| ZZEF1       | rs1043246   | 17 | 3,828,086  | G | C | 15.7   | 15.7   | 7.9x10 <sup>-7</sup>  | 1.05 (1.03-1.07) | N | N | N | 74,117 | 823,997 | 0.73 |
| ZZEF1       | rs3826482   | 17 | 3,860,356  | A | T | 57.6   | 42.4   | 2.1x10 <sup>-7</sup>  | 1.03 (1.02-1.05) | N | N | N | 74,116 | 823,996 | 0.94 |
| ZZEF1       | rs1377807   | 17 | 4,045,440  | C | G | 31.2   | 31.2   | 4.2x10 <sup>-13</sup> | 1.05 (1.04-1.07) | N | N | Y | 74,117 | 823,997 | 0.99 |
| ATP1B2      | rs1641523   | 17 | 7,549,681  | C | T | 42.8   | 42.8   | 1.2x10 <sup>-10</sup> | 1.05 (1.04-1.07) | Y | Y | Y | 50,400 | 523,886 | 0.97 |
| ATP1B2      | rs62059712  | 17 | 7,740,170  | T | C | 91.8   | 8.16   | 4.9x10 <sup>-6</sup>  | 1.07 (1.04-1.10) | Y | Y | N | 50,402 | 523,888 | 0.90 |
| GLP2R       | rs7222481   | 17 | 9,785,187  | C | G | 32.4   | 32.4   | 1.4x10 <sup>-8</sup>  | 1.04 (1.03-1.05) | N | N | Y | 74,117 | 823,996 | 1.00 |
| RAI1        | rs4925109   | 17 | 17,661,802 | A | G | 31.6   | 31.6   | 2.8x10 <sup>-12</sup> | 1.05 (1.03-1.06) | N | Y | Y | 74,117 | 823,997 | 1.00 |
| NF1         | rs71372253  | 17 | 29,413,019 | C | T | 6.42   | 6.42   | 4.4x10 <sup>-8</sup>  | 1.08 (1.05-1.10) | N | Y | Y | 74,117 | 823,997 | 0.89 |
| HNF1B       | rs10962     | 17 | 36,046,451 | C | G | 22.6   | 22.6   | 9.9x10 <sup>-10</sup> | 1.05 (1.03-1.07) | N | N | N | 74,117 | 823,997 | 0.89 |
| HNF1B       | rs2189301   | 17 | 36,063,685 | G | A | 87.2   | 12.8   | 6.5x10 <sup>-8</sup>  | 1.05 (1.03-1.08) | N | N | N | 74,117 | 823,997 | 0.98 |
| HNF1B       | rs10908278  | 17 | 36,099,952 | T | A | 48.1   | 48.1   | 6.4x10 <sup>-36</sup> | 1.08 (1.07-1.10) | N | N | Y | 74,116 | 823,997 | 0.96 |
| MLX         | rs34855406  | 17 | 40,731,411 | C | G | 27.7   | 27.7   | 2.3x10 <sup>-12</sup> | 1.05 (1.04-1.07) | N | N | Y | 74,116 | 823,997 | 1.00 |
| TTL6        | rs35895680  | 17 | 47,060,322 | C | A | 67.8   | 32.2   | 2.5x10 <sup>-15</sup> | 1.06 (1.04-1.07) | N | N | Y | 74,117 | 823,997 | 0.96 |
| KIF2B       | rs569511541 | 17 | 52,140,805 | G | A | 0.0200 | 0.0200 | 1.5x10 <sup>-8</sup>  | 7.63 (3.78-15.4) | N | Y | Y | 37,528 | 715,995 | 0.69 |
| ACE         | rs2727301   | 17 | 61,965,043 | T | C | 75.4   | 24.6   | 1.3x10 <sup>-6</sup>  | 1.04 (1.02-1.05) | N | Y | N | 74,117 | 823,996 | 0.96 |
| ACE         | rs60276348  | 17 | 62,203,304 | T | C | 14.0   | 14.0   | 2.6x10 <sup>-8</sup>  | 1.05 (1.03-1.07) | N | Y | Y | 74,117 | 823,997 | 0.93 |
| BPTF        | rs11657492  | 17 | 65,648,427 | G | T | 10.0   | 10.0   | 5.6x10 <sup>-8</sup>  | 1.06 (1.04-1.08) | N | N | N | 74,117 | 823,997 | 0.96 |
| BPTF        | rs558308082 | 17 | 65,820,153 | C | G | 0.0800 | 0.0800 | 6.6x10 <sup>-6</sup>  | 2.04 (1.49-2.77) | N | N | N | 60,898 | 785,469 | 0.73 |
| BPTF        | rs61676547  | 17 | 65,892,507 | C | G | 19.2   | 19.2   | 2.9x10 <sup>-11</sup> | 1.06 (1.04-1.07) | N | N | Y | 74,117 | 823,997 | 0.98 |
| LAMA1       | rs7240767   | 18 | 7,070,642  | C | T | 37.6   | 37.6   | 1.6x10 <sup>-8</sup>  | 1.04 (1.02-1.05) | N | N | Y | 74,115 | 823,997 | 0.98 |
| COMMD9      | rs62080313  | 18 | 36,278,709 | C | T | 12.3   | 12.3   | 1.0x10 <sup>-8</sup>  | 1.06 (1.04-1.08) | N | Y | Y | 74,117 | 823,996 | 1.00 |
| TCF4        | rs76197067  | 18 | 52,604,955 | G | A | 0.0500 | 0.0500 | 8.1x10 <sup>-6</sup>  | 2.68 (1.74-4.12) | N | Y | N | 39,596 | 474,053 | 0.94 |
| TCF4        | rs72926932  | 18 | 53,050,646 | C | A | 8.39   | 8.39   | 1.0x10 <sup>-14</sup> | 1.09 (1.07-1.12) | N | Y | Y | 74,117 | 823,997 | 1.00 |
| TCF4        | rs28719468  | 18 | 53,452,144 | C | T | 15.9   | 15.9   | 1.9x10 <sup>-6</sup>  | 1.04 (1.02-1.06) | N | Y | N | 74,117 | 823,997 | 1.00 |
| WDR7        | rs17684074  | 18 | 54,675,384 | G | C | 74.0   | 26.0   | 2.9x10 <sup>-8</sup>  | 1.04 (1.03-1.06) | N | Y | Y | 74,116 | 823,997 | 0.99 |
| GRP         | rs9957145   | 18 | 56,876,228 | G | A | 82.9   | 17.1   | 8.1x10 <sup>-9</sup>  | 1.05 (1.03-1.07) | N | Y | Y | 74,117 | 823,997 | 0.98 |
| MC4R        | rs523288    | 18 | 57,848,369 | T | A | 23.8   | 23.8   | 7.6x10 <sup>-13</sup> | 1.05 (1.04-1.07) | N | N | Y | 74,116 | 823,997 | 1.00 |
| MC4R        | rs74452128  | 18 | 58,056,566 | C | A | 97.6   | 2.37   | 1.0x10 <sup>-9</sup>  | 1.15 (1.10-1.20) | N | N | N | 74,117 | 823,997 | 0.97 |
| BCL2A       | rs10469140  | 18 | 60,668,270 | G | A | 48.5   | 48.5   | 6.6x10 <sup>-6</sup>  | 1.03 (1.02-1.04) | N | N | N | 74,115 | 823,995 | 0.99 |
| BCL2A       | rs12454712  | 18 | 60,845,884 | T | C | 61.4   | 38.6   | 4.6x10 <sup>-13</sup> | 1.05 (1.04-1.06) | N | N | Y | 74,116 | 823,996 | 0.87 |
| UHRF1       | rs7249758   | 19 | 4,948,862  | A | G | 20.4   | 20.4   | 3.4x10 <sup>-9</sup>  | 1.05 (1.03-1.07) | N | Y | Y | 74,117 | 823,996 | 0.98 |
| PTPRS       | rs116953931 | 19 | 5,224,998  | A | G | 3.71   | 3.71   | 6.4x10 <sup>-6</sup>  | 1.08 (1.04-1.12) | N | Y | N | 74,117 | 823,997 | 0.94 |
| INSR        | rs75253922  | 19 | 7,240,848  | C | T | 19.1   | 19.1   | 2.7x10 <sup>-8</sup>  | 1.05 (1.03-1.06) | N | Y | Y | 74,117 | 823,997 | 0.98 |
| MAP2K7      | rs4804833   | 19 | 7,970,635  | A | G | 39.0   | 39.0   | 7.7x10 <sup>-13</sup> | 1.05 (1.03-1.06) | N | Y | Y | 74,117 | 823,997 | 0.96 |
| FARSA       | rs755734872 | 19 | 12,938,471 | T | C | 0.0500 | 0.0500 | 8.3x10 <sup>-6</sup>  | 2.37 (1.62-3.46) | N | Y | N | 37,418 | 480,876 | 0.81 |
| FARSA       | rs3111316   | 19 | 13,038,415 | A | G | 58.9   | 41.2   | 6.3x10 <sup>-13</sup> | 1.05 (1.03-1.06) | N | Y | Y | 74,115 | 823,997 | 0.97 |
| TM6SF2      | rs8107974   | 19 | 19,388,500 | T | A | 7.69   | 7.69   | 3.3x10 <sup>-15</sup> | 1.10 (1.07-1.12) | N | N | Y | 74,116 | 823,996 | 0.99 |
| TM6SF2      | rs188247550 | 19 | 19,396,616 | T | C | 1.95   | 1.95   | 5.2x10 <sup>-6</sup>  | 1.15 (1.08-1.22) | N | N | N | 73,705 | 823,607 | 0.66 |
| PEPD        | rs10406327  | 19 | 33,890,838 | C | G | 52.3   | 47.7   | 3.8x10 <sup>-8</sup>  | 1.04 (1.02-1.05) | N | N | Y | 74,117 | 823,996 | 0.99 |
| TOMM40/APOE | rs745903616 | 19 | 44,938,870 | A | G | 0.130  | 0.130  | 8.3x10 <sup>-6</sup>  | 1.61 (1.30-1.98) | N | N | N | 61,325 | 782,180 | 0.82 |
| TOMM40/APOE | rs429358    | 19 | 45,411,941 | T | C | 84.6   | 15.4   | 2.6x10 <sup>-18</sup> | 1.08 (1.06-1.10) | N | N | Y | 74,117 | 823,997 | 0.92 |
| GIPR        | rs10406431  | 19 | 46,157,019 | A | G | 56.3   | 43.8   | 9.6x10 <sup>-14</sup> | 1.05 (1.04-1.06) | N | N | Y | 74,117 | 823,996 | 0.95 |
| GIPR        | rs2238689   | 19 | 46,178,661 | C | T | 41.8   | 41.8   | 5.4x10 <sup>-9</sup>  | 1.04 (1.03-1.05) | N | N | N | 74,116 | 823,996 | 0.94 |
| GIPR        | rs533172266 | 19 | 46,351,837 | T | C | 0.0600 | 0.0600 | 3.7x10 <sup>-6</sup>  | 2.33 (1.63-3.33) | N | N | N | 47,435 | 495,952 | 0.70 |
| ZC3H4       | rs3810291   | 19 | 47,569,003 | A | G | 67.3   | 32.7   | 8.9x10 <sup>-12</sup> | 1.05 (1.03-1.06) | N | Y | Y | 74,116 | 823,996 | 0.94 |
| NKX2.2      | rs13041756  | 20 | 21,466,795 | C | T | 10.7   | 10.7   | 1.4x10 <sup>-8</sup>  | 1.06 (1.04-1.08) | N | Y | Y | 74,117 | 823,997 | 0.99 |
| RALY        | rs2268078   | 20 | 32,596,704 | A | G | 65.7   | 34.3   | 2.3x10 <sup>-10</sup> | 1.04 (1.03-1.06) | N | Y | Y | 74,115 | 823,995 | 0.98 |
| HNF4A       | rs76811102  | 20 | 42,905,415 | T | C | 4.24   | 4.24   | 1.1x10 <sup>-7</sup>  | 1.09 (1.06-1.13) | N | N | N | 74,117 | 823,997 | 0.83 |

|                    |             |    |            |   |   |       |      |                       |                  |   |   |   |        |         |      |
|--------------------|-------------|----|------------|---|---|-------|------|-----------------------|------------------|---|---|---|--------|---------|------|
| <i>HNFA4</i>       | rs4810426   | 20 | 43,001,721 | T | C | 10.6  | 10.6 | $3.1 \times 10^{-17}$ | 1.09 (1.07-1.12) | N | N | N | 74,117 | 823,997 | 0.98 |
| <i>HNFA4</i>       | rs191830490 | 20 | 43,023,355 | G | A | 99.4  | 0.59 | $2.2 \times 10^{-6}$  | 1.24 (1.13-1.36) | N | N | N | 73,967 | 822,104 | 0.87 |
| <i>HNFA4</i>       | rs1800961   | 20 | 43,042,364 | T | C | 3.53  | 3.53 | $2.3 \times 10^{-22}$ | 1.18 (1.15-1.23) | N | N | Y | 74,117 | 823,997 | 0.98 |
| <i>HNFA4</i>       | rs11696357  | 20 | 43,233,649 | A | G | 93.4  | 6.60 | $9.9 \times 10^{-6}$  | 1.06 (1.04-1.09) | N | N | N | 74,117 | 823,997 | 0.75 |
| <i>EYA2</i>        | rs560716466 | 20 | 45,317,678 | A | G | 0.310 | 0.31 | $9.8 \times 10^{-6}$  | 1.36 (1.19-1.56) | N | Y | N | 69,739 | 808,452 | 0.71 |
| <i>EYA2</i>        | rs6063048   | 20 | 45,598,564 | G | A | 72.5  | 27.5 | $2.2 \times 10^{-11}$ | 1.05 (1.03-1.06) | N | Y | Y | 74,117 | 823,996 | 0.99 |
| <i>CEBPB</i>       | rs11699802  | 20 | 48,832,135 | C | T | 53.6  | 46.4 | $1.8 \times 10^{-11}$ | 1.04 (1.03-1.06) | N | Y | Y | 74,116 | 823,996 | 0.98 |
| <i>TSHZ2</i>       | rs34454109  | 20 | 51,223,594 | A | T | 77.1  | 22.9 | $7.1 \times 10^{-9}$  | 1.04 (1.03-1.06) | N | Y | Y | 74,115 | 823,997 | 0.99 |
| <i>GNAS</i>        | rs6070625   | 20 | 57,394,628 | G | C | 51.7  | 48.3 | $5.3 \times 10^{-14}$ | 1.05 (1.04-1.06) | N | Y | Y | 74,117 | 823,995 | 1.00 |
| <i>GNAS</i>        | rs862016    | 20 | 57,551,099 | G | A | 7.83  | 7.83 | $1.1 \times 10^{-7}$  | 1.07 (1.04-1.09) | N | Y | N | 74,115 | 823,995 | 0.94 |
| <i>ZBTB46</i>      | rs6011155   | 20 | 62,450,664 | T | C | 63.0  | 37.0 | $6.3 \times 10^{-6}$  | 1.04 (1.02-1.05) | Y | Y | N | 50,402 | 523,887 | 0.96 |
| <i>TCEA2</i>       | rs59944054  | 20 | 62,693,175 | A | G | 23.8  | 23.8 | $1.5 \times 10^{-8}$  | 1.06 (1.04-1.08) | Y | Y | Y | 50,402 | 523,888 | 0.97 |
| <i>MTMR3/ASCC2</i> | rs6518681   | 22 | 30,609,554 | G | A | 91.4  | 8.64 | $1.1 \times 10^{-12}$ | 1.09 (1.06-1.11) | N | N | Y | 74,115 | 823,995 | 0.98 |
| <i>YWHAH</i>       | rs117001013 | 22 | 32,348,841 | C | T | 91.2  | 8.83 | $1.7 \times 10^{-8}$  | 1.07 (1.04-1.09) | N | Y | Y | 74,117 | 823,997 | 0.99 |
| <i>EP300</i>       | rs5758223   | 22 | 41,489,920 | A | G | 71.7  | 28.3 | $3.8 \times 10^{-8}$  | 1.04 (1.03-1.05) | N | Y | Y | 74,116 | 823,996 | 1.00 |
| <i>PNPLA3</i>      | rs738408    | 22 | 44,324,730 | T | C | 22.6  | 22.6 | $1.4 \times 10^{-10}$ | 1.05 (1.03-1.07) | N | N | Y | 74,116 | 823,996 | 0.98 |
| <i>PIM3</i>        | rs1801645   | 22 | 50,356,850 | C | T | 27.5  | 27.5 | $1.5 \times 10^{-8}$  | 1.04 (1.02-1.05) | N | N | Y | 74,116 | 823,996 | 0.85 |
| <i>PIM3</i>        | rs112915006 | 22 | 50,604,696 | G | A | 5.12  | 5.12 | $9.8 \times 10^{-7}$  | 1.08 (1.05-1.11) | N | N | N | 74,117 | 823,997 | 0.96 |

RAF: risk allele frequency; MAF: minor allele frequency; OR: Odds ratio; CI: confidence interval.

**Supplementary Table 3 | Summary of comparison of effect estimates from BMI-adjusted and BMI-unadjusted analyses models obtained from the 28 studies the contributed to both analyses.**

| Nearest gene | Index variant | Chromosome | Position (Build 37 bp) | Risk allele | Other allele | RAF (%) | MAF (%) | BMI-unadjusted |          |                       |                  | BMI-unadjusted |          |                       |                  | Heterogeneity p-value |
|--------------|---------------|------------|------------------------|-------------|--------------|---------|---------|----------------|----------|-----------------------|------------------|----------------|----------|-----------------------|------------------|-----------------------|
|              |               |            |                        |             |              |         |         | Cases          | Controls | p-value               | OR (95% CI)      | Cases          | Controls | p-value               | OR (95% CI)      |                       |
| MACF1        | rs3768321     | 1          | 40,035,928             | T           | G            | 20.0    | 20.0    | 50,791         | 526,120  | 3.3x10 <sup>-20</sup> | 1.09 (1.07-1.11) | 50,401         | 523,887  | 9.6x10 <sup>-16</sup> | 1.08 (1.06-1.10) | 0.05                  |
| FAF1         | rs58432198    | 1          | 51,256,091             | C           | T            | 88.1    | 11.9    | 50,711         | 521,613  | 3.9x10 <sup>-8</sup>  | 1.07 (1.04-1.09) | 50,322         | 519,380  | 1.4x10 <sup>-9</sup>  | 1.08 (1.05-1.10) | 0.1                   |
| PATJ         | rs12140153    | 1          | 62,579,891             | G           | T            | 90.5    | 9.49    | 50,791         | 526,121  | 1.2x10 <sup>-8</sup>  | 1.08 (1.05-1.10) | 50,402         | 523,888  | 0.005                 | 1.04 (1.01-1.07) | 9.3x10 <sup>-10</sup> |
| DENND2C      | rs184660829   | 1          | 115,144,899            | C           | T            | 0.0200  | 0.0200  | 26,326         | 457,160  | 8.6x10 <sup>-8</sup>  | 7.88 (3.70-16.8) | 26,115         | 455,486  | 9.8x10 <sup>-7</sup>  | 6.42 (3.05-13.5) | 0.2                   |
| PTGFRN       | rs1127215     | 1          | 117,532,790            | C           | T            | 58.4    | 41.6    | 50,791         | 526,119  | 5.1x10 <sup>-10</sup> | 1.05 (1.03-1.06) | 50,402         | 523,888  | 6.2x10 <sup>-11</sup> | 1.05 (1.04-1.07) | 0.3                   |
| NOTCH2       | rs1493694     | 1          | 120,526,982            | T           | C            | 10.9    | 10.9    | 50,791         | 526,121  | 8.0x10 <sup>-14</sup> | 1.09 (1.07-1.12) | 50,402         | 523,888  | 1.7x10 <sup>-15</sup> | 1.10 (1.07-1.13) | 0.1                   |
| FAM63A       | rs10305745    | 1          | 150,786,038            | A           | G            | 1.45    | 1.45    | 50,069         | 523,661  | 1.1x10 <sup>-6</sup>  | 1.32 (1.18-1.48) | 49,681         | 521,430  | 4.5x10 <sup>-6</sup>  | 1.32 (1.17-1.48) | 0.9                   |
| FAM63A       | rs145904381   | 1          | 151,017,991            | T           | C            | 98.7    | 1.33    | 50,791         | 526,121  | 2.5x10 <sup>-7</sup>  | 1.20 (1.12-1.29) | 50,402         | 523,888  | 3.4x10 <sup>-7</sup>  | 1.20 (1.12-1.29) | 0.9                   |
| SEC16B       | rs539515      | 1          | 177,889,025            | C           | A            | 19.8    | 19.8    | 50,790         | 526,120  | 2.6x10 <sup>-10</sup> | 1.06 (1.04-1.08) | 50,401         | 523,887  | 0.07                  | 1.02 (1.00-1.04) | 2.7x10 <sup>-22</sup> |
| DSTYK        | rs12048743    | 1          | 205,114,873            | C           | A            | 44.2    | 44.2    | 50,791         | 526,120  | 1.6x10 <sup>-7</sup>  | 1.04 (1.02-1.05) | 50,402         | 523,887  | 3.3x10 <sup>-7</sup>  | 1.04 (1.02-1.05) | 1                     |
| SRGAP2       | rs9430095     | 1          | 206,593,900            | C           | G            | 49.4    | 49.4    | 50,790         | 526,120  | 0.00007               | 1.03 (1.02-1.04) | 50,401         | 523,886  | 0.00006               | 1.03 (1.02-1.05) | 0.8                   |
| PROX1        | rs79687284    | 1          | 214,150,821            | C           | G            | 3.48    | 3.48    | 50,791         | 526,121  | 4.3x10 <sup>-19</sup> | 1.21 (1.16-1.26) | 50,402         | 523,888  | 6.3x10 <sup>-21</sup> | 1.23 (1.18-1.28) | 0.2                   |
| PROX1        | rs340874      | 1          | 214,159,256            | C           | T            | 55.6    | 44.5    | 50,791         | 526,121  | 3.8x10 <sup>-21</sup> | 1.07 (1.06-1.09) | 50,402         | 523,888  | 4.8x10 <sup>-21</sup> | 1.07 (1.06-1.09) | 0.6                   |
| PROX1        | rs114526150   | 1          | 214,175,531            | G           | T            | 2.25    | 2.25    | 50,790         | 526,121  | 0.01                  | 1.06 (1.01-1.12) | 50,402         | 523,888  | 0.009                 | 1.07 (1.02-1.12) | 0.8                   |
| LYPLAL1      | rs553014999   | 1          | 219,584,164            | C           | T            | 0.130   | 0.130   | 26,999         | 463,806  | 0.0007                | 2.22 (1.40-3.51) | 26,788         | 462,132  | 0.002                 | 2.07 (1.31-3.28) | 0.5                   |
| LYPLAL1      | rs2820446     | 1          | 219,748,818            | C           | G            | 70.6    | 29.5    | 50,791         | 526,121  | 2.7x10 <sup>-10</sup> | 1.05 (1.04-1.07) | 50,402         | 523,888  | 5.8x10 <sup>-14</sup> | 1.06 (1.05-1.08) | 0.002                 |
| ABCB10       | rs348330      | 1          | 229,672,955            | G           | A            | 36.1    | 36.1    | 50,789         | 526,120  | 8.4x10 <sup>-11</sup> | 1.05 (1.04-1.07) | 50,400         | 523,887  | 3.7x10 <sup>-11</sup> | 1.05 (1.04-1.07) | 0.6                   |
| GN4          | rs291367      | 1          | 235,690,800            | G           | A            | 63.2    | 36.8    | 50,791         | 526,119  | 3.4x10 <sup>-8</sup>  | 1.04 (1.03-1.06) | 50,401         | 523,887  | 1.5x10 <sup>-10</sup> | 1.04 (1.02-1.05) | 0.2                   |
| TMEM18       | rs62107261    | 2          | 422,144                | T           | C            | 95.4    | 4.64    | 50,791         | 526,121  | 9.6x10 <sup>-9</sup>  | 1.11 (1.08-1.16) | 50,402         | 523,888  | 0.1                   | 1.03 (0.99-1.07) | 3.9x10 <sup>-21</sup> |
| TMEM18       | rs35913461    | 2          | 653,575                | C           | T            | 82.9    | 17.1    | 50,791         | 526,120  | 3.7x10 <sup>-9</sup>  | 1.06 (1.04-1.08) | 50,402         | 523,888  | 0.3                   | 1.01 (0.99-1.03) | 1.7x10 <sup>-26</sup> |
| FAM49A       | rs11680058    | 2          | 16,574,669             | A           | G            | 86.3    | 13.7    | 50,789         | 526,119  | 6.7x10 <sup>-6</sup>  | 1.06 (1.03-1.08) | 50,400         | 523,886  | 7.9x10 <sup>-6</sup>  | 1.06 (1.03-1.08) | 0.9                   |
| DTNB         | rs17802463    | 2          | 25,643,221             | G           | T            | 73.1    | 26.9    | 50,791         | 526,121  | 5.7x10 <sup>-7</sup>  | 1.04 (1.03-1.06) | 50,401         | 523,888  | 9.9x10 <sup>-7</sup>  | 1.04 (1.02-1.06) | 1                     |
| GCKR         | rs1260326     | 2          | 27,730,940             | C           | T            | 60.7    | 39.3    | 50,791         | 526,121  | 9.6x10 <sup>-25</sup> | 1.08 (1.06-1.09) | 50,402         | 523,888  | 7.4x10 <sup>-19</sup> | 1.07 (1.05-1.09) | 0.01                  |
| THADA        | rs28525376    | 2          | 43,207,872             | G           | T            | 42.2    | 42.2    | 50,790         | 526,119  | 0.009                 | 1.02 (1.00-1.03) | 50,401         | 523,886  | 0.0008                | 1.03 (1.01-1.04) | 0.07                  |
| THADA        | rs6708643     | 2          | 43,430,440             | A           | G            | 50.1    | 49.9    | 50,790         | 526,119  | 2.1x10 <sup>-8</sup>  | 1.04 (1.03-1.06) | 50,401         | 523,886  | 3.4x10 <sup>-11</sup> | 1.05 (1.04-1.07) | 0.009                 |
| THADA        | rs80147536    | 2          | 43,698,028             | A           | T            | 90.4    | 9.57    | 50,790         | 526,121  | 3.8x10 <sup>-25</sup> | 1.14 (1.11-1.17) | 50,400         | 523,888  | 2.3x10 <sup>-26</sup> | 1.15 (1.12-1.17) | 0.3                   |
| BNIP1        | rs10193538    | 2          | 58,981,064             | T           | G            | 61.0    | 39.0    | 50,790         | 526,120  | 2.5x10 <sup>-9</sup>  | 1.05 (1.03-1.06) | 50,400         | 523,887  | 0.0002                | 1.03 (1.01-1.04) | 1.8x10 <sup>-6</sup>  |
| BNIP1        | rs6545714     | 2          | 59,307,725             | G           | A            | 39.2    | 39.2    | 50,790         | 526,120  | 4.3x10 <sup>-7</sup>  | 1.04 (1.02-1.05) | 50,400         | 523,887  | 0.003                 | 1.02 (1.01-1.04) | 0.00001               |
| BCL11A       | rs243024      | 2          | 60,583,665             | A           | G            | 46.0    | 46.0    | 50,790         | 526,120  | 7.2x10 <sup>-15</sup> | 1.06 (1.04-1.07) | 50,400         | 523,888  | 4.5x10 <sup>-15</sup> | 1.06 (1.05-1.08) | 0.6                   |
| CEP68        | rs2249105     | 2          | 65,287,896             | A           | G            | 63.4    | 36.6    | 50,791         | 526,121  | 1.4x10 <sup>-11</sup> | 1.05 (1.04-1.07) | 50,402         | 523,888  | 8.4x10 <sup>-11</sup> | 1.05 (1.04-1.07) | 0.8                   |
| CEP68        | rs2052261     | 2          | 65,355,270             | G           | A            | 30.4    | 30.4    | 50,790         | 526,120  | 0.0001                | 1.03 (1.02-1.05) | 50,401         | 523,887  | 0.00005               | 1.03 (1.02-1.05) | 0.6                   |
| CEP68        | rs2028150     | 2          | 65,655,012             | C           | G            | 59.8    | 40.2    | 50,791         | 526,121  | 5.1x10 <sup>-11</sup> | 1.05 (1.03-1.07) | 50,401         | 523,888  | 7.4x10 <sup>-11</sup> | 1.05 (1.04-1.07) | 0.8                   |
| TMEM127      | rs79046683    | 2          | 96,913,918             | T           | G            | 0.480   | 0.480   | 35,029         | 479,149  | 2.5x10 <sup>-7</sup>  | 2.12 (1.59-2.81) | 34,775         | 477,429  | 3.0x10 <sup>-8</sup>  | 2.34 (1.73-3.16) | 0.1                   |
| DDX17        | rs562386202   | 2          | 118,071,061            | G           | A            | 0.0600  | 0.0600  | 26,326         | 457,160  | 3.4x10 <sup>-8</sup>  | 3.20 (2.12-4.85) | 26,115         | 455,486  | 1.8x10 <sup>-8</sup>  | 3.31 (2.18-5.01) | 0.7                   |
| GLI2         | rs11688931    | 2          | 121,318,166            | C           | G            | 84.9    | 15.1    | 50,791         | 526,121  | 2.5x10 <sup>-9</sup>  | 1.06 (1.04-1.08) | 50,402         | 523,888  | 2.1x10 <sup>-10</sup> | 1.07 (1.05-1.09) | 0.2                   |
| GLI2         | rs11688682    | 2          | 121,347,612            | G           | C            | 72.8    | 27.2    | 50,791         | 526,120  | 5.4x10 <sup>-12</sup> | 1.06 (1.04-1.08) | 50,401         | 523,887  | 1.6x10 <sup>-13</sup> | 1.07 (1.05-1.09) | 0.2                   |
| GLI2         | rs66477705    | 2          | 121,378,852            | T           | C            | 96.7    | 3.30    | 50,791         | 526,121  | 0.0004                | 1.08 (1.04-1.13) | 50,402         | 523,888  | 0.0005                | 1.08 (1.03-1.13) | 0.9                   |
| PABPC1P2     | rs35999103    | 2          | 147,861,633            | T           | C            | 15.5    | 15.5    | 50,790         | 526,121  | 6.1x10 <sup>-8</sup>  | 1.06 (1.04-1.08) | 50,401         | 523,888  | 3.6x10 <sup>-6</sup>  | 1.05 (1.03-1.07) | 0.2                   |
| CYTIP        | rs13426680    | 2          | 158,339,550            | A           | G            | 93.7    | 6.27    | 50,791         | 526,120  | 1.0x10 <sup>-7</sup>  | 1.08 (1.05-1.11) | 50,402         | 523,887  | 1.4x10 <sup>-9</sup>  | 1.10 (1.06-1.13) | 0.05                  |
| RBMS1        | rs3772071     | 2          | 161,135,544            | T           | C            | 71.4    | 28.7    | 50,789         | 526,119  | 1.0x10 <sup>-7</sup>  | 1.04 (1.03-1.06) | 50,400         | 523,887  | 0.00005               | 1.03 (1.02-1.05) | 0.01                  |
| GRB14/COBLL1 | rs10195252    | 2          | 165,513,091            | T           | C            | 58.6    | 41.4    | 50,791         | 526,121  | 7.4x10 <sup>-18</sup> | 1.07 (1.05-1.08) | 50,402         | 523,888  | 5.7x10 <sup>-26</sup> | 1.08 (1.07-1.10) | 1.3x10 <sup>-6</sup>  |
| GRB14/COBLL1 | rs13024606    | 2          | 165,573,194            | T           | C            | 4.72    | 4.72    | 50,791         | 526,121  | 0.0002                | 1.07 (1.03-1.11) | 50,402         | 523,888  | 0.001                 | 1.06 (1.02-1.10) | 0.3                   |
| CRYBA2       | rs113414093   | 2          | 219,859,171            | A           | G            | 5.14    | 5.14    | 50,791         | 526,121  | 1.6x10 <sup>-6</sup>  | 1.10 (1.06-1.14) | 50,402         | 523,888  | 6.6x10 <sup>-9</sup>  | 1.12 (1.08-1.17) | 0.01                  |
| IRS1         | rs2972144     | 2          | 227,101,411            | G           | A            | 63.9    | 36.2    | 50,789         | 526,120  | 3.7x10 <sup>-37</sup> | 1.10 (1.09-1.12) | 50,400         | 523,887  | 2.9x10 <sup>-40</sup> | 1.11 (1.09-1.13) | 0.05                  |
| PPARG        | rs11709077    | 3          | 12,336,507             | G           | A            | 87.7    | 12.4    | 50,791         | 526,121  | 9.0x10 <sup>-18</sup> | 1.10 (1.08-1.12) | 50,402         | 523,888  | 5.0x10 <sup>-25</sup> | 1.13 (1.10-1.15) | 9.8x10 <sup>-6</sup>  |
| PPARG        | rs17819328    | 3          | 12,489,342             | G           | T            | 42.5    | 42.5    | 50,791         | 526,121  | 2.6x10 <sup>-8</sup>  | 1.04 (1.03-1.06) | 50,402         | 523,888  | 1.2x10 <sup>-8</sup>  | 1.04 (1.03-1.06) | 0.7                   |
| UBE2E2       | rs35352848    | 3          | 23,455,582             | T           | C            | 78.8    | 21.2    | 50,791         | 526,121  | 2.9x10 <sup>-20</sup> | 1.09 (1.07-1.11) | 50,402         | 523,888  | 5.4x10 <sup>-22</sup> | 1.09 (1.07-1.11) | 0.2                   |
| UBE2E2       | rs17013314    | 3          | 23,510,044             | G           | A            | 3.13    | 3.13    | 50,790         | 526,120  | 1.0x10 <sup>-8</sup>  | 1.13 (1.09-1.18) | 50,401         | 523,888  | 6.1x10 <sup>-8</sup>  | 1.13 (1.08-1.18) | 0.7                   |
| KIF9         | rs11926707    | 3          | 46,925,539             | C           | T            | 62.6    | 37.4    | 50,789         | 526,119  | 4.4x10 <sup>-8</sup>  | 1.04 (1.03-1.06) | 50,400         | 523,886  | 1.7x10 <sup>-9</sup>  | 1.05 (1.03-1.06) | 0.1                   |
| KIF9         | rs75423501    | 3          | 47,242,923             | G           | A            | 10.1    | 10.1    | 50,710         | 521,612  | 1.1x10 <sup>-6</sup>  | 1.07 (1.04-1.09) | 50,321         | 519,379  | 0.0005                | 1.05 (1.02-1.08) | 0.005                 |
| RBM6         | rs4688760     | 3          | 49,980,596             | T           | C            | 68.4    | 31.6    | 50,789         | 526,121  | 3.7x10 <sup>-9</sup>  | 1.05 (1.03-1.06) | 50,401         | 523,887  | 0.001                 | 1.03 (1.01-1.04) | 2.8x10 <sup>-8</sup>  |
| RFT1         | rs2581787     | 3          | 53,127,677             | T           | G            | 56.3    | 43.7    | 50,790         | 526,120  | 1.2x10 <sup>-7</sup>  | 1.04 (1.02-1.05) | 50,401         | 523,887  | 0.00002               | 1.03 (1.02-1.05) | 0.06                  |
| CACNA2D3     | rs76263492    | 3          | 54,828,827             | T           | G            | 4.52    | 4.52    | 50,791         | 526,120  | 9.3x10 <sup>-8</sup>  | 1.10 (1.06-1.14) | 50,402         | 523,887  | 1.4x10 <sup>-8</sup>  | 1.11 (1.07-1.15) | 0.3                   |
| PSMD6        | rs3774723     | 3          | 63,962,339             | G           | A            | 84.4    | 15.6    | 50,791         | 526,120  | 1.1x10 <sup>-10</sup> | 1.07 (1.05-1.09) | 50,402         | 523,888  | 1.7x10 <sup>-10</sup> | 1.07 (1.05-1.09) | 0.8                   |
| PSMD6        | rs74368513    | 3          | 64,460,694             | G           | A            | 99.6    | 0.440   | 49,518         | 517,893  | 0.0001                | 1.31 (1.14-1.50) | 49,208         | 520,167  | 0.0003                | 1.29 (1.12-1.48) | 0.6                   |
| ADAMTS9      | rs9860730     | 3          | 64,701,146             | A           | G            | 70.4    | 29.6    | 50,791         | 526,121  | 1.0x10 <sup>-11</sup> | 1.06 (1.04-1.07) | 50,402         | 523,888  | 4.1x10 <sup>-16</sup> | 1.07 (1.05-1.09) | 0.0008                |
| SHQ1         | rs13085136    | 3          | 72,865,183             | C           | T            | 92.8    | 7.17    | 50,791         | 526,121  | 2.5x10 <sup>-9</sup>  | 1.09 (1.06-1.12) | 50,402         | 523,888  | 5.6x10 <sup>-9</sup>  | 1.09 (1.06-1.12) | 1                     |
| ROBO2        | rs2272163     | 3          | 77,671,721             | C           | A            | 61.8    | 38.2    | 50,790         | 526,120  | 0.00003               | 1.03 (1.02-1.05) | 50,402         | 523,887  | 0.0008                | 1.03 (1.01-1.04) | 0.1                   |
| ADCY5        | rs11708067    | 3          | 123,065,778            | A           | G            | 77.2    | 22.8    | 50,791         | 526,121  | 9.3x10 <sup>-28</sup> | 1.10 (1.08-1.12) | 50,402         | 523,888  | 3.1x10 <sup>-33</sup> | 1.11 (1.09-1.13) | 0.003                 |
| SLC12A8      | rs649961      | 3          | 124,926,637            | T           | C            | 46.5    | 46.5    | 50,789         | 526,120  | 5.0x10 <sup>-8</sup>  | 1.04 (1.03-1.06) | 50,40          |          |                       |                  |                       |

|          |             |   |             |   |   |       |       |        |         |                       |                  |        |         |                       |                  |                       |
|----------|-------------|---|-------------|---|---|-------|-------|--------|---------|-----------------------|------------------|--------|---------|-----------------------|------------------|-----------------------|
| TMCC1    | rs559138871 | 3 | 129,470,067 | T | C | 0.200 | 0.200 | 44,190 | 499,486 | 4.6x10 <sup>-7</sup>  | 1.61 (1.34-1.94) | 43,891 | 497,703 | 1.3x10 <sup>-6</sup>  | 1.59 (1.32-1.92) | 0.8                   |
| TSC22D2  | rs62271373  | 3 | 150,066,540 | A | T | 5.53  | 5.53  | 50,791 | 526,121 | 1.4x10 <sup>-7</sup>  | 1.09 (1.06-1.12) | 50,402 | 523,888 | 2.5x10 <sup>-9</sup>  | 1.10 (1.07-1.14) | 0.07                  |
| MBNL1    | rs13065698  | 3 | 152,086,533 | A | G | 60.0  | 40.0  | 50,791 | 526,121 | 2.9x10 <sup>-6</sup>  | 1.04 (1.02-1.05) | 50,402 | 523,887 | 0.00005               | 1.03 (1.02-1.05) | 0.3                   |
| MBNL1    | rs74653713  | 3 | 152,417,881 | C | A | 95.7  | 4.29  | 50,790 | 526,121 | 1.5x10 <sup>-9</sup>  | 1.12 (1.08-1.17) | 50,401 | 523,888 | 8.3x10 <sup>-11</sup> | 1.14 (1.09-1.18) | 0.2                   |
| MBNL1    | rs35497231  | 3 | 152,433,628 | C | T | 31.7  | 31.7  | 50,789 | 526,119 | 4.2x10 <sup>-6</sup>  | 1.04 (1.02-1.05) | 50,401 | 523,886 | 2.8x10 <sup>-6</sup>  | 1.04 (1.02-1.05) | 0.7                   |
| EGFEM1P  | rs7629630   | 3 | 168,218,841 | A | T | 85.7  | 14.3  | 50,791 | 526,121 | 1.8x10 <sup>-6</sup>  | 1.05 (1.03-1.07) | 50,402 | 523,887 | 5.8x10 <sup>-6</sup>  | 1.05 (1.03-1.07) | 0.8                   |
| SLC2A2   | rs9873618   | 3 | 170,733,076 | G | A | 71.0  | 29.0  | 50,791 | 526,120 | 1.2x10 <sup>-15</sup> | 1.07 (1.05-1.08) | 50,402 | 523,888 | 2.7x10 <sup>-21</sup> | 1.08 (1.06-1.10) | 0.0002                |
| ABCC5    | rs2872246   | 3 | 183,738,460 | A | C | 45.4  | 45.4  | 50,791 | 526,120 | 3.0x10 <sup>-7</sup>  | 1.04 (1.02-1.05) | 50,401 | 523,887 | 0.0001                | 1.03 (1.01-1.04) | 0.01                  |
| IGF2BP2  | rs6780171   | 3 | 185,503,456 | A | T | 31.4  | 31.4  | 50,789 | 526,120 | 4.4x10 <sup>-45</sup> | 1.12 (1.10-1.13) | 50,401 | 523,887 | 2.4x10 <sup>-51</sup> | 1.13 (1.11-1.15) | 0.003                 |
| IGF2BP2  | rs150111048 | 3 | 185,514,421 | G | A | 23.9  | 23.9  | 45,267 | 501,592 | 0.05                  | 1.21 (1.00-1.47) | 45,638 | 500,506 | 0.1                   | 1.17 (0.96-1.42) | 0.4                   |
| IGF2BP2  | rs11717959  | 3 | 185,541,213 | G | T | 62.1  | 37.9  | 50,791 | 526,121 | 3.3x10 <sup>-7</sup>  | 1.04 (1.02-1.05) | 50,401 | 523,888 | 1.4x10 <sup>-8</sup>  | 1.04 (1.03-1.06) | 0.1                   |
| IGF2BP2  | rs1516728   | 3 | 185,829,891 | A | T | 75.9  | 24.1  | 50,789 | 526,119 | 0.0004                | 1.03 (1.01-1.05) | 50,400 | 523,886 | 0.2                   | 1.01 (0.99-1.03) | 1.2x10 <sup>-6</sup>  |
| ST6GAL1  | rs3887925   | 3 | 186,665,645 | T | C | 54.7  | 45.3  | 50,791 | 526,121 | 2.1x10 <sup>-14</sup> | 1.06 (1.04-1.07) | 50,402 | 523,888 | 3.7x10 <sup>-16</sup> | 1.06 (1.05-1.08) | 0.1                   |
| ST6GAL1  | rs7645517   | 3 | 186,675,277 | A | G | 5.76  | 5.76  | 50,791 | 526,120 | 0.003                 | 1.05 (1.02-1.08) | 50,402 | 523,887 | 0.006                 | 1.05 (1.01-1.08) | 0.7                   |
| LPP      | rs4686471   | 3 | 187,740,899 | C | T | 61.0  | 39.0  | 50,789 | 526,119 | 1.1x10 <sup>-19</sup> | 1.07 (1.05-1.09) | 50,400 | 523,886 | 1.1x10 <sup>-19</sup> | 1.07 (1.06-1.09) | 0.6                   |
| PCGF3    | rs111827885 | 4 | 616,608     | C | T | 1.56  | 1.56  | 45,840 | 512,001 | 0.00009               | 1.17 (1.08-1.26) | 45,601 | 511,670 | 0.00002               | 1.19 (1.00-1.28) | 0.3                   |
| PCGF3    | rs1531583   | 4 | 744,972     | T | G | 4.58  | 4.58  | 50,791 | 526,121 | 1.1x10 <sup>-10</sup> | 1.13 (1.09-1.17) | 50,402 | 523,888 | 8.8x10 <sup>-12</sup> | 1.14 (1.10-1.18) | 0.2                   |
| PCGF3    | rs35654957  | 4 | 1,010,077   | C | T | 36.7  | 36.7  | 50,790 | 526,120 | 0.0007                | 1.03 (1.01-1.04) | 50,401 | 523,887 | 0.0001                | 1.03 (1.01-1.05) | 0.2                   |
| MAEA     | rs56337234  | 4 | 1,784,403   | C | T | 50.3  | 49.7  | 50,790 | 526,119 | 1.2x10 <sup>-15</sup> | 1.06 (1.05-1.08) | 50,401 | 523,886 | 1.3x10 <sup>-21</sup> | 1.08 (1.06-1.09) | 0.00008               |
| HTT      | rs362307    | 4 | 3,241,845   | T | C | 7.68  | 7.68  | 50,791 | 526,121 | 4.8x10 <sup>-7</sup>  | 1.07 (1.04-1.10) | 50,402 | 523,886 | 0.0005                | 1.05 (1.02-1.08) | 0.001                 |
| WFS1     | rs1801212   | 4 | 6,302,519   | A | G | 70.9  | 29.1  | 50,791 | 526,121 | 1.3x10 <sup>-34</sup> | 1.10 (1.09-1.12) | 50,402 | 523,888 | 1.3x10 <sup>-31</sup> | 1.10 (1.08-1.12) | 0.5                   |
| WFS1     | rs10937721  | 4 | 6,306,763   | C | G | 58.8  | 41.2  | 50,789 | 526,119 | 1.3x10 <sup>-33</sup> | 1.09 (1.08-1.11) | 50,400 | 523,886 | 1.8x10 <sup>-31</sup> | 1.09 (1.08-1.11) | 0.6                   |
| LCORL    | rs12640250  | 4 | 17,792,869  | C | A | 71.5  | 28.5  | 50,789 | 526,119 | 0.00003               | 1.03 (1.02-1.05) | 50,400 | 523,886 | 0.0004                | 1.03 (1.01-1.05) | 0.2                   |
| GNPDA2   | rs10938398  | 4 | 45,186,139  | A | G | 42.9  | 42.9  | 50,790 | 526,120 | 1.4x10 <sup>-7</sup>  | 1.04 (1.02-1.05) | 50,400 | 523,887 | 0.1                   | 1.01 (1.00-1.03) | 1.5x10 <sup>-16</sup> |
| USP46    | rs2102278   | 4 | 52,818,664  | G | A | 31.9  | 31.9  | 50,790 | 526,119 | 3.4x10 <sup>-6</sup>  | 1.04 (1.02-1.05) | 50,400 | 523,886 | 0.0002                | 1.03 (1.01-1.05) | 0.06                  |
| USP46    | rs114447556 | 4 | 53,207,093  | T | C | 8.39  | 8.39  | 50,790 | 526,121 | 0.00002               | 1.06 (1.03-1.09) | 50,401 | 523,888 | 0.002                 | 1.05 (1.02-1.08) | 0.02                  |
| SCD5     | rs12642790  | 4 | 83,578,271  | A | G | 33.8  | 33.8  | 50,790 | 526,120 | 2.5x10 <sup>-9</sup>  | 1.05 (1.03-1.06) | 50,400 | 523,887 | 1.0x10 <sup>-8</sup>  | 1.05 (1.03-1.06) | 0.9                   |
| FAM13A   | rs1903002   | 4 | 89,740,894  | A | C | 50.1  | 50.0  | 50,789 | 526,119 | 0.00003               | 1.03 (1.02-1.05) | 50,400 | 523,886 | 2.7x10 <sup>-6</sup>  | 1.04 (1.02-1.05) | 0.2                   |
| FAM13A   | rs576406049 | 4 | 89,857,291  | T | C | 0.130 | 0.130 | 39,467 | 496,986 | 2.2x10 <sup>-6</sup>  | 1.82 (1.42-2.33) | 44,289 | 502,471 | 8.1x10 <sup>-7</sup>  | 1.87 (1.46-2.39) | 0.6                   |
| SMARCAD1 | rs6821438   | 4 | 95,091,911  | A | G | 53.4  | 46.6  | 50,790 | 526,120 | 3.4x10 <sup>-6</sup>  | 1.03 (1.02-1.05) | 50,401 | 523,887 | 0.0005                | 1.03 (1.01-1.04) | 0.02                  |
| SLC9B1   | rs1580278   | 4 | 104,140,848 | C | A | 47.3  | 47.3  | 50,789 | 526,119 | 1.9x10 <sup>-8</sup>  | 1.04 (1.03-1.06) | 50,400 | 523,886 | 6.1x10 <sup>-7</sup>  | 1.04 (1.02-1.05) | 0.3                   |
| PABPC4L  | rs1296328   | 4 | 137,083,193 | A | C | 44.6  | 44.6  | 50,790 | 526,119 | 1.0x10 <sup>-6</sup>  | 1.04 (1.02-1.05) | 50,400 | 523,886 | 0.001                 | 1.02 (1.01-1.04) | 0.0005                |
| TMEM154  | rs7669833   | 4 | 153,513,369 | T | A | 70.5  | 29.6  | 50,790 | 526,121 | 5.8x10 <sup>-11</sup> | 1.05 (1.04-1.07) | 50,401 | 523,888 | 4.4x10 <sup>-13</sup> | 1.06 (1.04-1.08) | 0.06                  |
| PDGFC    | rs28819812  | 4 | 157,652,753 | C | A | 67.7  | 32.3  | 50,789 | 526,121 | 3.6x10 <sup>-7</sup>  | 1.04 (1.02-1.06) | 50,401 | 523,888 | 7.7x10 <sup>-8</sup>  | 1.04 (1.03-1.06) | 0.4                   |
| ACSL1    | rs58730668  | 4 | 185,717,759 | T | C | 85.8  | 14.2  | 50,791 | 526,121 | 4.2x10 <sup>-10</sup> | 1.07 (1.05-1.09) | 50,402 | 523,888 | 2.5x10 <sup>-11</sup> | 1.07 (1.05-1.10) | 0.2                   |
| ANKH     | rs3845281   | 5 | 14,610,134  | G | A | 90.4  | 9.61  | 50,791 | 526,121 | 0.00007               | 1.05 (1.03-1.08) | 50,402 | 523,888 | 0.0003                | 1.05 (1.02-1.07) | 0.5                   |
| ANKH     | rs78408340  | 5 | 14,751,305  | C | T | 99.4  | 0.620 | 47,969 | 516,095 | 6.7x10 <sup>-14</sup> | 1.47 (1.33-1.63) | 47,581 | 513,864 | 5.6x10 <sup>-14</sup> | 1.48 (1.34-1.64) | 0.9                   |
| ANKH     | rs17250977  | 5 | 14,753,745  | G | A | 3.76  | 3.76  | 50,791 | 526,121 | 1.2x10 <sup>-12</sup> | 1.15 (1.11-1.20) | 50,402 | 523,888 | 9.5x10 <sup>-14</sup> | 1.16 (1.12-1.21) | 0.3                   |
| ANKH     | rs6885132   | 5 | 14,768,092  | C | G | 90.4  | 9.60  | 50,791 | 526,121 | 1.6x10 <sup>-12</sup> | 1.09 (1.07-1.12) | 50,402 | 523,888 | 6.6x10 <sup>-14</sup> | 1.10 (1.07-1.13) | 0.2                   |
| ANKH     | rs76549217  | 5 | 14,768,766  | T | C | 2.95  | 2.95  | 50,791 | 526,121 | 1.8x10 <sup>-6</sup>  | 1.12 (1.07-1.17) | 50,402 | 523,888 | 1.1x10 <sup>-7</sup>  | 1.13 (1.08-1.19) | 0.2                   |
| MRPS30   | rs62368490  | 5 | 44,534,364  | T | C | 3.13  | 3.13  | 50,712 | 521,614 | 0.00003               | 1.10 (1.05-1.15) | 50,323 | 519,381 | 0.0001                | 1.09 (1.04-1.14) | 0.6                   |
| MRPS30   | rs6884702   | 5 | 44,682,589  | G | A | 39.3  | 39.3  | 50,711 | 521,614 | 6.1x10 <sup>-7</sup>  | 1.04 (1.02-1.05) | 50,323 | 519,380 | 5.7x10 <sup>-7</sup>  | 1.04 (1.02-1.05) | 0.7                   |
| ITGA1    | rs17261179  | 5 | 51,791,225  | T | C | 51.7  | 48.3  | 50,790 | 526,120 | 1.6x10 <sup>-6</sup>  | 1.04 (1.02-1.05) | 50,401 | 523,887 | 0.00002               | 1.03 (1.02-1.05) | 0.3                   |
| ITGA1    | rs3811978   | 5 | 52,100,489  | G | A | 16.7  | 16.7  | 50,790 | 526,120 | 8.3x10 <sup>-8</sup>  | 1.05 (1.03-1.07) | 50,401 | 523,887 | 9.1x10 <sup>-9</sup>  | 1.06 (1.04-1.08) | 0.3                   |
| ITGA1    | rs62357230  | 5 | 52,315,682  | A | G | 3.39  | 3.39  | 50,791 | 526,121 | 0.00004               | 1.09 (1.04-1.13) | 50,401 | 523,888 | 0.00003               | 1.09 (1.05-1.14) | 0.6                   |
| ARL15    | rs62370480  | 5 | 52,774,510  | A | G | 22.0  | 22.0  | 50,790 | 526,121 | 4.8x10 <sup>-7</sup>  | 1.05 (1.03-1.06) | 50,401 | 523,888 | 1.7x10 <sup>-7</sup>  | 1.05 (1.03-1.07) | 0.5                   |
| ARL15    | rs702634    | 5 | 53,271,420  | A | G | 69.0  | 31.0  | 50,790 | 526,121 | 1.1x10 <sup>-9</sup>  | 1.05 (1.03-1.07) | 50,401 | 523,887 | 9.7x10 <sup>-14</sup> | 1.06 (1.05-1.08) | 0.0007                |
| ARL15    | rs279744    | 5 | 54,412,620  | C | A | 69.1  | 30.9  | 50,791 | 526,121 | 0.00008               | 1.03 (1.02-1.05) | 50,402 | 523,888 | 0.0001                | 1.03 (1.02-1.05) | 1                     |
| ANKRD55  | rs465002    | 5 | 55,808,475  | T | C | 74.2  | 25.8  | 50,789 | 526,119 | 6.0x10 <sup>-20</sup> | 1.08 (1.06-1.10) | 50,401 | 523,886 | 7.6x10 <sup>-21</sup> | 1.08 (1.06-1.10) | 0.3                   |
| ANKRD55  | rs2431115   | 5 | 55,848,669  | A | G | 40.2  | 40.2  | 50,789 | 526,119 | 0.004                 | 1.02 (1.01-1.04) | 50,400 | 523,886 | 0.0007                | 1.03 (1.01-1.04) | 0.2                   |
| ANKRD55  | rs9687832   | 5 | 55,861,595  | A | G | 19.8  | 19.8  | 50,791 | 526,121 | 2.2x10 <sup>-12</sup> | 1.07 (1.05-1.09) | 50,401 | 523,888 | 8.0x10 <sup>-13</sup> | 1.07 (1.05-1.09) | 0.5                   |
| ANKRD55  | rs96844     | 5 | 56,196,604  | G | A | 26.2  | 26.2  | 50,790 | 526,119 | 2.8x10 <sup>-8</sup>  | 1.05 (1.03-1.06) | 50,400 | 523,887 | 4.2x10 <sup>-7</sup>  | 1.04 (1.03-1.06) | 0.5                   |
| PIK3R1   | rs4976033   | 5 | 67,714,246  | G | A | 41.1  | 41.1  | 50,790 | 526,120 | 2.7x10 <sup>-7</sup>  | 1.04 (1.02-1.05) | 50,401 | 523,887 | 1.0x10 <sup>-9</sup>  | 1.05 (1.03-1.06) | 0.01                  |
| POCS     | rs2307111   | 5 | 75,003,678  | T | C | 60.5  | 39.5  | 50,791 | 526,121 | 6.5x10 <sup>-13</sup> | 1.05 (1.04-1.07) | 50,402 | 523,888 | 0.0005                | 1.03 (1.01-1.04) | 4.5x10 <sup>-15</sup> |
| ZBED3    | rs4457053   | 5 | 76,424,949  | G | A | 30.4  | 30.4  | 50,789 | 526,119 | 5.0x10 <sup>-14</sup> | 1.06 (1.04-1.08) | 50,400 | 523,886 | 1.5x10 <sup>-17</sup> | 1.07 (1.05-1.09) | 0.008                 |
| DMGDH    | rs1316776   | 5 | 78,430,607  | C | A | 64.8  | 35.2  | 50,789 | 526,121 | 3.8x10 <sup>-9</sup>  | 1.05 (1.03-1.06) | 50,401 | 523,888 | 8.4x10 <sup>-8</sup>  | 1.04 (1.03-1.06) | 0.4                   |
| RASA1    | rs7719891   | 5 | 86,577,352  | G | A | 25.9  | 25.9  | 50,791 | 526,121 | 3.9x10 <sup>-7</sup>  | 1.04 (1.03-1.06) | 50,402 | 523,888 | 0.00008               | 1.03 (1.02-1.05) | 0.03                  |
| SLCO6A1  | rs138337556 | 5 | 101,232,944 | G | A | 0.360 | 0.360 | 40,729 | 499,464 | 4.3x10 <sup>-11</sup> | 1.67 (1.43-1.94) | 41,128 | 498,415 | 5.2x10 <sup>-12</sup> | 1.71 (1.47-1.99) | 0.5                   |
| PAM      | rs78408340  | 5 | 102,338,739 | G | C | 0.830 | 0.830 | 45,108 | 516,569 | 5.3x10 <sup>-18</sup> | 1.47 (1.34-1.60) | 49,990 | 523,498 | 2.1x10 <sup>-20</sup> | 1.50 (1.38-1.64) | 0.2                   |
| PAM      | rs115505614 | 5 | 102,422,968 | T | C | 4.99  | 4.99  | 50,791 | 526,121 | 1.1x10 <sup>-24</sup> | 1.19 (1.15-1.24) | 50,402 | 523,888 | 3.8x10 <sup>-27</sup> | 1.21 (1.17-1.25) | 0.1                   |
| PHF15    | rs244665    | 5 | 133,414,622 | A | G | 70.3  | 29.7  | 50,789 | 526,119 | 0.00001               | 1.04 (1.02-1.05) | 50,400 | 523,886 | 0.0003                | 1.03 (1.01-1.05) | 0.2                   |
| PHF15    | rs329122    | 5 | 133,864,599 | A | G | 42.9  | 42.9  | 50,791 | 526,121 | 3.3x10 <sup>-8</sup>  | 1.04 (1.03-1.06) | 50,    |         |                       |                  |                       |

|            |             |   |             |   |   |        |        |        |         |                       |                  |        |         |                       |                  |                       |
|------------|-------------|---|-------------|---|---|--------|--------|--------|---------|-----------------------|------------------|--------|---------|-----------------------|------------------|-----------------------|
| VEGFA      | rs11967262  | 6 | 43,760,327  | G | C | 48.6   | 48.6   | 50,790 | 526,119 | 3.5x10 <sup>-9</sup>  | 1.04 (1.03-1.06) | 50,401 | 523,886 | 3.7x10 <sup>-13</sup> | 1.06 (1.04-1.07) | 0.0007                |
| VEGFA      | rs6458354   | 6 | 43,814,190  | C | T | 28.9   | 28.9   | 50,790 | 526,119 | 3.4x10 <sup>-9</sup>  | 1.05 (1.03-1.07) | 50,401 | 523,886 | 7.4x10 <sup>-11</sup> | 1.05 (1.04-1.07) | 0.1                   |
| TFAP2B     | rs3798519   | 6 | 50,788,778  | C | A | 18.4   | 18.4   | 50,791 | 526,121 | 4.7x10 <sup>-12</sup> | 1.07 (1.05-1.09) | 50,402 | 523,888 | 0.0002                | 1.04 (1.02-1.06) | 2.4x10 <sup>-11</sup> |
| TFAP2B     | rs2465043   | 6 | 51,180,765  | G | A | 64.4   | 35.6   | 50,790 | 526,121 | 0.00002               | 1.03 (1.02-1.05) | 50,401 | 523,888 | 0.0004                | 1.02 (1.01-1.04) | 0.004                 |
| SLC25A51P1 | rs555402748 | 6 | 67,387,490  | T | C | 0.0400 | 0.0400 | 36,772 | 475,836 | 1.6x10 <sup>-7</sup>  | 3.67 (2.25-5.96) | 36,490 | 474,088 | 1.1x10 <sup>-8</sup>  | 4.20 (2.57-6.88) | 0.2                   |
| BEND3      | rs4946812   | 6 | 107,431,688 | G | A | 67.4   | 32.6   | 50,791 | 526,121 | 8.5x10 <sup>-7</sup>  | 1.04 (1.02-1.06) | 50,402 | 523,888 | 1.8x10 <sup>-6</sup>  | 1.04 (1.02-1.06) | 1                     |
| CENPW      | rs11759026  | 6 | 126,792,095 | G | A | 23.2   | 23.2   | 50,791 | 526,121 | 6.1x10 <sup>-14</sup> | 1.07 (1.05-1.09) | 50,402 | 523,888 | 1.2x10 <sup>-16</sup> | 1.08 (1.06-1.10) | 0.03                  |
| SOGA3      | rs2800733   | 6 | 127,416,930 | A | G | 71.7   | 28.4   | 50,791 | 526,121 | 4.3x10 <sup>-12</sup> | 1.06 (1.04-1.07) | 50,402 | 523,888 | 2.4x10 <sup>-14</sup> | 1.07 (1.05-1.08) | 0.05                  |
| SLC35D3    | rs9494624   | 6 | 137,300,960 | A | G | 29.0   | 29.0   | 50,790 | 526,119 | 2.0x10 <sup>-6</sup>  | 1.04 (1.02-1.06) | 50,401 | 523,886 | 8.3x10 <sup>-8</sup>  | 1.05 (1.03-1.06) | 0.1                   |
| MIR3668    | rs2982521   | 6 | 139,835,329 | A | T | 38.0   | 38.0   | 50,790 | 526,120 | 8.1x10 <sup>-7</sup>  | 1.04 (1.02-1.05) | 50,402 | 523,887 | 8.8x10 <sup>-9</sup>  | 1.05 (1.03-1.06) | 0.03                  |
| MIR3668    | rs616279    | 6 | 140,249,466 | A | G | 73.8   | 26.2   | 50,710 | 521,612 | 0.00002               | 1.04 (1.02-1.05) | 50,321 | 519,379 | 4.7x10 <sup>-6</sup>  | 1.04 (1.02-1.06) | 0.4                   |
| SLC22A3    | rs474513    | 6 | 160,770,312 | A | G | 51.7   | 48.3   | 50,791 | 526,121 | 8.1x10 <sup>-9</sup>  | 1.04 (1.03-1.06) | 50,402 | 523,888 | 1.3x10 <sup>-11</sup> | 1.05 (1.04-1.07) | 0.009                 |
| QKI        | rs4709746   | 6 | 164,133,001 | C | T | 86.8   | 13.2   | 50,791 | 526,121 | 8.7x10 <sup>-9</sup>  | 1.07 (1.04-1.09) | 50,402 | 523,888 | 3.5x10 <sup>-11</sup> | 1.08 (1.05-1.10) | 0.03                  |
| DGKB       | rs17168486  | 7 | 14,898,282  | T | C | 18.1   | 18.1   | 50,791 | 526,120 | 3.1x10 <sup>-14</sup> | 1.08 (1.06-1.10) | 50,401 | 523,887 | 7.5x10 <sup>-14</sup> | 1.08 (1.06-1.10) | 0.9                   |
| DGKB       | rs10228066  | 7 | 15,063,569  | T | C | 53.7   | 46.3   | 50,790 | 526,119 | 2.9x10 <sup>-21</sup> | 1.07 (1.06-1.09) | 50,401 | 523,887 | 2.2x10 <sup>-21</sup> | 1.07 (1.06-1.09) | 0.5                   |
| DGKB       | rs2908334   | 7 | 15,206,239  | T | C | 63.1   | 36.9   | 50,791 | 526,120 | 0.05                  | 1.01 (1.00-1.03) | 50,401 | 523,887 | 0.08                  | 1.01 (1.00-1.03) | 0.8                   |
| IGF2BP3    | rs78840640  | 7 | 23,434,606  | G | C | 2.20   | 2.20   | 50,791 | 526,121 | 3.7x10 <sup>-6</sup>  | 1.12 (1.07-1.18) | 50,402 | 523,888 | 3.1x10 <sup>-7</sup>  | 1.14 (1.09-1.20) | 0.2                   |
| IGF2BP3    | rs4279506   | 7 | 23,512,896  | G | C | 61.0   | 39.0   | 50,790 | 526,121 | 1.5x10 <sup>-8</sup>  | 1.04 (1.03-1.06) | 50,401 | 523,888 | 2.8x10 <sup>-8</sup>  | 1.04 (1.03-1.06) | 0.9                   |
| JAZF1      | rs1708302   | 7 | 28,198,677  | C | T | 51.2   | 48.8   | 50,790 | 526,120 | 6.4x10 <sup>-31</sup> | 1.09 (1.07-1.10) | 50,401 | 523,887 | 8.7x10 <sup>-41</sup> | 1.11 (1.09-1.12) | 2.0x10 <sup>-6</sup>  |
| CRHR2      | rs917195    | 7 | 30,728,452  | C | T | 77.0   | 23.0   | 50,791 | 526,121 | 7.8x10 <sup>-8</sup>  | 1.05 (1.03-1.07) | 50,402 | 523,888 | 1.3x10 <sup>-11</sup> | 1.04 (1.03-1.06) | 0.3                   |
| GCK        | rs878521    | 7 | 44,255,643  | A | G | 24.5   | 24.5   | 50,791 | 526,121 | 2.8x10 <sup>-11</sup> | 1.06 (1.04-1.08) | 50,402 | 523,888 | 8.7x10 <sup>-13</sup> | 1.06 (1.05-1.08) | 0.1                   |
| GCK        | rs116913033 | 7 | 44,365,549  | C | T | 83.0   | 17.0   | 50,791 | 526,121 | 0.00002               | 1.04 (1.02-1.06) | 50,402 | 523,888 | 0.0002                | 1.04 (1.02-1.06) | 0.3                   |
| FBXL13     | rs56376556  | 7 | 102,038,318 | T | C | 5.33   | 5.33   | 50,791 | 526,121 | 4.3x10 <sup>-7</sup>  | 1.10 (1.06-1.14) | 50,402 | 523,888 | 1.9x10 <sup>-6</sup>  | 1.09 (1.05-1.13) | 0.7                   |
| FBXL13     | rs11496066  | 7 | 102,486,254 | T | C | 81.8   | 18.2   | 50,791 | 526,121 | 7.3x10 <sup>-8</sup>  | 1.05 (1.03-1.07) | 50,402 | 523,888 | 1.6x10 <sup>-7</sup>  | 1.05 (1.03-1.07) | 0.9                   |
| RELN       | rs62482405  | 7 | 102,987,583 | G | T | 8.19   | 8.19   | 50,791 | 526,120 | 8.8x10 <sup>-7</sup>  | 1.07 (1.04-1.10) | 50,402 | 523,887 | 1.3x10 <sup>-6</sup>  | 1.07 (1.04-1.10) | 0.9                   |
| RELN       | rs39328     | 7 | 103,444,978 | T | C | 43.3   | 43.3   | 50,791 | 526,121 | 4.5x10 <sup>-6</sup>  | 1.03 (1.02-1.05) | 50,402 | 523,888 | 0.005                 | 1.02 (1.01-1.04) | 0.0002                |
| CITNBP2    | rs6976111   | 7 | 117,495,667 | A | C | 31.3   | 31.3   | 50,790 | 526,121 | 3.9x10 <sup>-7</sup>  | 1.04 (1.02-1.06) | 50,402 | 523,888 | 4.9x10 <sup>-6</sup>  | 1.04 (1.02-1.05) | 0.4                   |
| KLF14      | rs2268382   | 7 | 130,027,037 | C | A | 32.7   | 32.7   | 50,791 | 526,121 | 0.0001                | 1.03 (1.01-1.05) | 50,402 | 523,887 | 0.001                 | 1.03 (1.01-1.04) | 0.4                   |
| KLF14      | rs1562396   | 7 | 130,457,914 | G | A | 31.9   | 31.9   | 50,790 | 526,121 | 8.1x10 <sup>-14</sup> | 1.06 (1.04-1.08) | 50,401 | 523,888 | 1.1x10 <sup>-16</sup> | 1.07 (1.05-1.09) | 0.02                  |
| AOC1       | rs62492368  | 7 | 150,537,635 | A | G | 30.8   | 30.8   | 50,791 | 526,121 | 2.4x10 <sup>-10</sup> | 1.05 (1.03-1.07) | 50,402 | 523,888 | 3.8x10 <sup>-10</sup> | 1.05 (1.04-1.07) | 0.8                   |
| MNX1       | rs6459733   | 7 | 156,930,550 | G | C | 67.3   | 32.7   | 50,791 | 526,121 | 7.1x10 <sup>-17</sup> | 1.07 (1.05-1.08) | 50,402 | 523,888 | 1.0x10 <sup>-14</sup> | 1.06 (1.05-1.08) | 0.4                   |
| MSRA       | rs17689007  | 8 | 9,974,824   | G | A | 53.3   | 46.7   | 50,711 | 521,614 | 2.5x10 <sup>-11</sup> | 1.05 (1.04-1.07) | 50,323 | 519,380 | 3.2x10 <sup>-6</sup>  | 1.04 (1.02-1.05) | 0.00004               |
| XKR6       | rs57327348  | 8 | 10,808,687  | A | T | 78.2   | 21.8   | 50,712 | 521,614 | 1.1x10 <sup>-7</sup>  | 1.05 (1.03-1.07) | 50,323 | 519,381 | 0.0003                | 1.03 (1.02-1.05) | 0.0006                |
| LPL        | rs10096633  | 8 | 19,830,921  | C | T | 87.7   | 12.3   | 50,791 | 526,121 | 2.9x10 <sup>-9</sup>  | 1.07 (1.05-1.09) | 50,402 | 523,888 | 2.1x10 <sup>-10</sup> | 1.08 (1.05-1.10) | 0.2                   |
| PURG       | rs10954772  | 8 | 30,863,938  | T | C | 31.4   | 31.4   | 50,789 | 526,119 | 6.0x10 <sup>-8</sup>  | 1.04 (1.03-1.06) | 50,400 | 523,886 | 0.0003                | 1.03 (1.01-1.05) | 0.0002                |
| ANK1       | rs13262861  | 8 | 41,509,915  | C | A | 82.9   | 17.1   | 50,791 | 526,121 | 3.2x10 <sup>-27</sup> | 1.11 (1.09-1.13) | 50,402 | 523,888 | 7.4x10 <sup>-27</sup> | 1.11 (1.09-1.14) | 0.8                   |
| ANK1       | rs4736819   | 8 | 41,509,915  | T | C | 55.4   | 44.6   | 50,789 | 526,119 | 1.1x10 <sup>-24</sup> | 1.08 (1.06-1.09) | 50,401 | 523,886 | 1.3x10 <sup>-22</sup> | 1.08 (1.06-1.09) | 0.7                   |
| ANK1       | rs148766658 | 8 | 41,552,046  | C | T | 3.78   | 3.78   | 50,791 | 526,121 | 3.2x10 <sup>-10</sup> | 1.13 (1.09-1.18) | 50,402 | 523,888 | 1.4x10 <sup>-10</sup> | 1.14 (1.10-1.19) | 0.5                   |
| TP53INP1   | rs11786992  | 8 | 95,685,147  | A | C | 64.4   | 35.6   | 50,791 | 526,121 | 3.8x10 <sup>-8</sup>  | 1.04 (1.03-1.06) | 50,402 | 523,888 | 1.1x10 <sup>-11</sup> | 1.05 (1.04-1.07) | 0.001                 |
| TP53INP1   | rs10097617  | 8 | 95,961,626  | T | C | 48.5   | 48.5   | 50,791 | 526,120 | 5.6x10 <sup>-12</sup> | 1.05 (1.04-1.07) | 50,402 | 523,886 | 2.0x10 <sup>-11</sup> | 1.05 (1.04-1.07) | 1                     |
| TP53INP1   | rs187936726 | 8 | 96,092,422  | G | A | 2.39   | 2.39   | 50,791 | 526,121 | 1.3x10 <sup>-6</sup>  | 1.14 (1.08-1.20) | 50,402 | 523,888 | 1.7x10 <sup>-6</sup>  | 1.14 (1.08-1.21) | 0.8                   |
| CPQ        | rs149364428 | 8 | 97,737,741  | A | G | 1.04   | 1.04   | 50,641 | 524,228 | 1.2x10 <sup>-11</sup> | 1.32 (1.22-1.43) | 50,252 | 521,995 | 3.8x10 <sup>-10</sup> | 1.30 (1.20-1.41) | 0.4                   |
| TRHR       | rs12680028  | 8 | 110,123,183 | C | G | 53.4   | 46.6   | 50,791 | 526,121 | 2.4x10 <sup>-7</sup>  | 1.04 (1.02-1.05) | 50,402 | 523,888 | 6.6x10 <sup>-6</sup>  | 1.03 (1.02-1.05) | 0.2                   |
| SLC30A8    | rs3802177   | 8 | 118,185,025 | G | A | 68.5   | 31.5   | 50,790 | 526,120 | 3.1x10 <sup>-45</sup> | 1.12 (1.1-1.140) | 50,401 | 523,888 | 3.8x10 <sup>-53</sup> | 1.13 (1.11-1.15) | 0.0004                |
| SLC30A8    | rs80244329  | 8 | 118,404,672 | G | A | 97.8   | 2.19   | 50,791 | 526,121 | 0.00005               | 1.12 (1.06-1.18) | 50,402 | 523,888 | 0.00002               | 1.13 (1.07-1.19) | 0.5                   |
| CASC11     | rs17772814  | 8 | 128,711,742 | G | A | 91.5   | 8.49   | 50,791 | 526,121 | 1.0x10 <sup>-6</sup>  | 1.07 (1.04-1.11) | 50,402 | 523,888 | 4.0x10 <sup>-8</sup>  | 1.09 (1.05-1.12) | 0.1                   |
| PVT1       | rs1561927   | 8 | 129,568,078 | C | T | 26.9   | 26.9   | 50,791 | 526,121 | 1.4x10 <sup>-6</sup>  | 1.04 (1.02-1.06) | 50,402 | 523,888 | 2.9x10 <sup>-6</sup>  | 1.04 (1.02-1.06) | 0.9                   |
| BOP1       | rs4977213   | 8 | 145,507,304 | C | T | 37.5   | 37.5   | 50,789 | 526,119 | 6.6x10 <sup>-12</sup> | 1.05 (1.04-1.07) | 50,400 | 523,886 | 1.2x10 <sup>-15</sup> | 1.06 (1.05-1.08) | 0.003                 |
| BOP1       | rs12719778  | 8 | 145,879,883 | T | C | 53.8   | 46.2   | 50,791 | 526,120 | 2.4x10 <sup>-7</sup>  | 1.04 (1.02-1.05) | 50,402 | 523,886 | 8.3x10 <sup>-8</sup>  | 1.04 (1.03-1.06) | 0.5                   |
| GLIS3      | rs510807    | 9 | 3,965,689   | A | C | 49.1   | 49.1   | 50,789 | 526,119 | 0.0005                | 1.03 (1.01-1.04) | 50,400 | 523,887 | 0.01                  | 1.02 (1.00-1.03) | 0.04                  |
| GLIS3      | rs79103584  | 9 | 4,243,045   | T | A | 98.6   | 1.38   | 50,791 | 526,120 | 0.0001                | 1.14 (1.06-1.21) | 50,402 | 523,887 | 0.00002               | 1.15 (1.08-1.23) | 0.3                   |
| GLIS3      | rs10974438  | 9 | 4,291,928   | C | A | 35.7   | 35.7   | 50,790 | 526,121 | 1.7x10 <sup>-13</sup> | 1.06 (1.04-1.07) | 50,401 | 523,887 | 3.2x10 <sup>-14</sup> | 1.06 (1.04-1.08) | 0.4                   |
| HAUS6      | rs7022807   | 9 | 19,067,833  | G | A | 40.1   | 40.1   | 50,790 | 526,121 | 4.9x10 <sup>-9</sup>  | 1.04 (1.03-1.06) | 50,401 | 523,888 | 3.2x10 <sup>-10</sup> | 1.05 (1.03-1.06) | 0.2                   |
| FOCAD      | rs7867635   | 9 | 20,241,069  | C | T | 41.2   | 41.2   | 50,789 | 526,119 | 2.4x10 <sup>-6</sup>  | 1.04 (1.02-1.05) | 50,400 | 523,886 | 0.00006               | 1.03 (1.02-1.05) | 0.2                   |
| FOCAD      | rs7847880   | 9 | 20,662,703  | C | T | 84.3   | 15.7   | 50,789 | 526,119 | 0.0002                | 1.04 (1.02-1.06) | 50,400 | 523,886 | 0.0007                | 1.04 (1.01-1.06) | 0.6                   |
| CDKN2A/B   | rs1412830   | 9 | 22,043,612  | C | T | 62.8   | 37.2   | 50,791 | 526,119 | 8.8x10 <sup>-11</sup> | 1.05 (1.04-1.07) | 50,402 | 523,886 | 9.3x10 <sup>-13</sup> | 1.06 (1.04-1.07) | 0.07                  |
| CDKN2A/B   | rs76011118  | 9 | 22,133,773  | A | G | 3.41   | 3.41   | 50,791 | 526,121 | 6.8x10 <sup>-18</sup> | 1.22 (1.16-1.27) | 50,402 | 523,888 | 2.7x10 <sup>-22</sup> | 1.25 (1.2-1.31)  | 0.004                 |
| CDKN2A/B   | rs10811660  | 9 | 22,134,068  | G | A | 82.8   | 17.2   | 50,791 | 526,121 | 2.2x10 <sup>-61</sup> | 1.18 (1.15-1.20) | 50,402 | 523,888 | 5.9x10 <sup>-69</sup> | 1.19 (1.17-1.22) | 0.003                 |
| CDKN2A/B   | rs10757283  | 9 | 22,134,172  | T | C | 43.0   | 43.0   | 50,790 | 526,120 | 0.01                  | 1.02 (1.00-1.03) | 50,401 | 523,887 | 0.002                 | 1.02 (1.01-1.04) | 0.1                   |
| CDKN2A/B   | rs1333052   | 9 | 22,157,908  | A | C | 66.0   | 34.0   | 50,790 | 526,121 | 0.03                  | 1.02 (1.00-1.03) | 50,400 | 523,888 | 0.02                  | 1.02 (1.00-1.03) | 0.5                   |
| CDKN2A/B   | rs1575972   | 9 | 22,301,092  | T | A | 96.7   | 3.29   | 50,791 | 526,121 | 0.00005               | 1.09 (1.04-1.13) | 50,402 | 523,888 | 6.4x10 <sup>-6</sup>  | 1.10 (1.06-1.15) | 0.2                   |
| LINGO2     | rs1412234   | 9 | 28,410,683  | C | T | 32.3   | 32.3   | 50,    |         |                       |                  |        |         |                       |                  |                       |

|               |                 |    |             |   |   |        |        |        |         |                        |                  |        |         |                        |                  |                       |
|---------------|-----------------|----|-------------|---|---|--------|--------|--------|---------|------------------------|------------------|--------|---------|------------------------|------------------|-----------------------|
| GPSM1         | rs11793035      | 9  | 139,507,212 | C | T | 33.1   | 33.1   | 50,789 | 526,119 | 7.2x10 <sup>-6</sup>   | 1.04 (1.02-1.05) | 50,400 | 523,886 | 2.8x10 <sup>-7</sup>   | 1.04 (1.03-1.06) | 0.09                  |
| GPSM1         | 9:139737088:G:A | 9  | 139,737,088 | A | G | 0.0700 | 0.0700 | 31,447 | 464,429 | 7.1x10 <sup>-6</sup>   | 2.73 (1.76-4.23) | 31,207 | 462,716 | 0.0003                 | 2.33 (1.48-3.66) | 0.1                   |
| CDC123/CAMK1D | rs11257655      | 10 | 12,307,894  | T | C | 21.8   | 21.8   | 50,791 | 526,121 | 3.8x10 <sup>-24</sup>  | 1.09 (1.07-1.11) | 50,402 | 523,888 | 7.7x10 <sup>-26</sup>  | 1.10 (1.08-1.12) | 0.2                   |
| NEUROG3       | rs177045        | 10 | 71,321,279  | G | A | 31.6   | 31.6   | 50,791 | 526,121 | 2.2x10 <sup>-10</sup>  | 1.05 (1.03-1.07) | 50,402 | 523,887 | 6.6x10 <sup>-10</sup>  | 1.05 (1.03-1.07) | 1                     |
| NEUROG3       | rs61850200      | 10 | 71,321,658  | C | G | 27.7   | 27.7   | 50,791 | 526,121 | 0.07                   | 1.02 (1.00-1.03) | 50,401 | 523,888 | 0.09                   | 1.01 (1.00-1.03) | 0.8                   |
| NEUROG3       | rs41277236      | 10 | 71,332,301  | T | C | 4.31   | 4.31   | 50,791 | 526,121 | 2.1x10 <sup>-9</sup>   | 1.12 (1.08-1.17) | 50,402 | 523,888 | 1.7x10 <sup>-9</sup>   | 1.13 (1.08-1.17) | 0.7                   |
| NEUROG3       | rs549498088     | 10 | 71,347,311  | T | C | 0.600  | 0.600  | 45,059 | 507,254 | 6.7x10 <sup>-8</sup>   | 1.65 (1.37-1.98) | 44,507 | 503,870 | 2.4x10 <sup>-7</sup>   | 1.65 (1.36-1.99) | 1                     |
| NEUROG3       | rs2642588       | 10 | 71,466,578  | G | T | 70.2   | 29.8   | 50,791 | 526,121 | 2.3x10 <sup>-9</sup>   | 1.05 (1.03-1.07) | 50,402 | 523,888 | 1.2x10 <sup>-9</sup>   | 1.05 (1.03-1.07) | 0.6                   |
| ZMIZ1         | rs703972        | 10 | 80,952,826  | G | C | 53.3   | 46.7   | 50,791 | 526,120 | 1.9x10 <sup>-24</sup>  | 1.08 (1.06-1.09) | 50,402 | 523,887 | 3.4x10 <sup>-26</sup>  | 1.08 (1.07-1.10) | 0.1                   |
| ZMIZ1         | rs1317617       | 10 | 81,096,589  | G | A | 79.8   | 20.2   | 50,791 | 526,121 | 0.0002                 | 1.03 (1.02-1.05) | 50,402 | 523,888 | 0.0002                 | 1.04 (1.02-1.05) | 0.7                   |
| PTEN          | rs11202627      | 10 | 89,769,340  | T | C | 15.2   | 15.2   | 50,791 | 526,121 | 2.0x10 <sup>-8</sup>   | 1.06 (1.04-1.08) | 50,402 | 523,888 | 4.7x10 <sup>-8</sup>   | 1.06 (1.04-1.08) | 0.9                   |
| HHEX/IDE      | rs7078559       | 10 | 93,924,663  | T | C | 57.8   | 42.2   | 50,790 | 526,121 | 1.8x10 <sup>-10</sup>  | 1.05 (1.03-1.06) | 50,400 | 523,888 | 4.7x10 <sup>-8</sup>   | 1.04 (1.03-1.06) | 0.09                  |
| HHEX/IDE      | rs10882101      | 10 | 94,462,427  | T | C | 58.7   | 41.3   | 50,790 | 526,121 | 5.6x10 <sup>-50</sup>  | 1.12 (1.10-1.13) | 50,401 | 523,888 | 1.6x10 <sup>-57</sup>  | 1.13 (1.11-1.15) | 0.0007                |
| HHEX/IDE      | rs1112718       | 10 | 94,479,107  | A | G | 59.8   | 40.2   | 50,791 | 526,120 | 2.7x10 <sup>-47</sup>  | 1.11 (1.10-1.13) | 50,402 | 523,886 | 5.5x10 <sup>-55</sup>  | 1.13 (1.11-1.14) | 0.0005                |
| TCF7L2        | rs536643418     | 10 | 114,699,835 | G | C | 0.520  | 0.520  | 47,555 | 512,283 | 3.8x10 <sup>-8</sup>   | 1.65 (1.38-1.98) | 47,249 | 510,491 | 1.7x10 <sup>-7</sup>   | 1.66 (1.37-2.00) | 1                     |
| TCF7L2        | rs140242150     | 10 | 114,702,962 | A | G | 0.500  | 0.500  | 46,759 | 509,075 | 1.2x10 <sup>-7</sup>   | 1.39 (1.23-1.58) | 47,044 | 513,490 | 1.7x10 <sup>-8</sup>   | 1.43 (1.27-1.62) | 0.4                   |
| TCF7L2        | rs7918400       | 10 | 114,703,136 | T | C | 47.6   | 47.6   | 50,791 | 526,119 | 0.4                    | 1.01 (0.99-1.02) | 50,402 | 523,886 | 0.04                   | 1.02 (1.00-1.03) | 0.009                 |
| TCF7L2        | rs184509201     | 10 | 114,740,337 | G | G | 98.2   | 1.82   | 50,791 | 526,121 | 3.1x10 <sup>-11</sup>  | 1.20 (1.14-1.27) | 50,402 | 523,888 | 1.1x10 <sup>-11</sup>  | 1.22 (1.15-1.29) | 0.5                   |
| TCF7L2        | rs180988137     | 10 | 114,751,173 | G | A | 1.04   | 1.04   | 50,791 | 526,121 | 2.4x10 <sup>-16</sup>  | 1.38 (1.28-1.49) | 50,402 | 523,888 | 1.4x10 <sup>-19</sup>  | 1.44 (1.33-1.56) | 0.02                  |
| TCF7L2        | rs7903146       | 10 | 114,758,349 | C | T | 70.6   | 29.5   | 50,791 | 526,121 | 6.3x10 <sup>-360</sup> | 1.38 (1.36-1.41) | 50,402 | 523,888 | 6.2x10 <sup>-422</sup> | 1.43 (1.41-1.46) | 1.5x10 <sup>-22</sup> |
| TCF7L2        | rs78025551      | 10 | 114,757,956 | C | G | 85.1   | 14.9   | 50,791 | 526,121 | 9.9x10 <sup>-54</sup>  | 1.17 (1.15-1.20) | 50,402 | 523,888 | 1.2x10 <sup>-56</sup>  | 1.18 (1.16-1.21) | 0.1                   |
| TCF7L2        | rs34855922      | 10 | 114,871,594 | A | G | 71.6   | 28.4   | 50,791 | 526,121 | 0.001                  | 1.03 (1.01-1.04) | 50,401 | 523,888 | 0.001                  | 1.03 (1.01-1.05) | 0.9                   |
| WDR11         | rs72631105      | 10 | 122,915,345 | A | G | 19.0   | 19.0   | 50,791 | 526,121 | 3.1x10 <sup>-8</sup>   | 1.05 (1.03-1.07) | 50,402 | 523,888 | 3.7x10 <sup>-9</sup>   | 1.06 (1.04-1.08) | 0.2                   |
| PLEKH1        | rs2280141       | 10 | 124,193,181 | T | G | 51.6   | 48.4   | 50,790 | 526,120 | 2.7x10 <sup>-8</sup>   | 1.04 (1.03-1.06) | 50,401 | 523,887 | 3.4x10 <sup>-10</sup>  | 1.05 (1.03-1.06) | 0.06                  |
| INS/IGF2      | rs12802972      | 11 | 1,704,596   | A | G | 42.8   | 42.8   | 50,789 | 526,121 | 0.0002                 | 1.03 (1.01-1.04) | 50,401 | 523,888 | 0.0001                 | 1.03 (1.01-1.05) | 0.7                   |
| INS/IGF2      | rs11042596      | 11 | 2,118,860   | G | T | 66.5   | 33.5   | 50,789 | 526,119 | 0.00002                | 1.03 (1.02-1.05) | 50,400 | 523,886 | 0.00005                | 1.03 (1.02-1.05) | 0.7                   |
| INS/IGF2      | rs555759341     | 11 | 2,151,761   | C | G | 0.490  | 0.490  | 46,197 | 507,005 | 7.8x10 <sup>-7</sup>   | 1.48 (1.27-1.73) | 45,890 | 505,220 | 8.4x10 <sup>-7</sup>   | 1.49 (1.27-1.74) | 0.9                   |
| INS/IGF2      | rs571342427     | 11 | 2,182,519   | C | T | 0.150  | 0.150  | 41,154 | 495,389 | 1.7x10 <sup>-8</sup>   | 1.86 (1.50-2.31) | 40,855 | 493,606 | 5.4x10 <sup>-8</sup>   | 1.83 (1.47-2.27) | 0.7                   |
| INS/IGF2      | rs4929965       | 11 | 2,197,286   | A | G | 38.3   | 38.3   | 50,789 | 526,120 | 2.0x10 <sup>-23</sup>  | 1.08 (1.06-1.09) | 50,401 | 523,886 | 1.6x10 <sup>-19</sup>  | 1.07 (1.06-1.09) | 0.1                   |
| KCNQ1         | rs4930091       | 11 | 2,372,356   | C | T | 75.9   | 24.1   | 50,789 | 526,119 | 0.0002                 | 1.03 (1.02-1.05) | 50,400 | 523,886 | 0.0004                 | 1.03 (1.01-1.05) | 0.8                   |
| KCNQ1         | rs2283164       | 11 | 2,579,163   | A | G | 94.7   | 5.32   | 50,791 | 526,121 | 0.00008                | 1.07 (1.03-1.10) | 50,402 | 523,888 | 0.0003                 | 1.06 (1.03-1.10) | 0.6                   |
| KCNQ1         | rs80102379      | 11 | 2,634,177   | G | T | 98.2   | 1.78   | 50,791 | 526,121 | 0.0009                 | 1.11 (1.04-1.17) | 50,402 | 523,888 | 0.0006                 | 1.11 (1.05-1.18) | 0.7                   |
| KCNQ1         | rs231349        | 11 | 2,672,821   | T | C | 10.2   | 10.2   | 50,791 | 526,121 | 4.8x10 <sup>-7</sup>   | 1.06 (1.04-1.09) | 50,402 | 523,888 | 4.0x10 <sup>-8</sup>   | 1.07 (1.04-1.10) | 0.2                   |
| KCNQ1         | rs231361        | 11 | 2,691,500   | A | G | 25.6   | 25.6   | 50,791 | 526,121 | 2.4x10 <sup>-15</sup>  | 1.07 (1.05-1.09) | 50,402 | 523,888 | 6.9x10 <sup>-18</sup>  | 1.08 (1.06-1.10) | 0.05                  |
| KCNQ1         | rs2283220       | 11 | 2,755,548   | A | G | 69.0   | 31.0   | 50,791 | 526,121 | 1.4x10 <sup>-9</sup>   | 1.05 (1.03-1.07) | 50,402 | 523,888 | 4.9x10 <sup>-11</sup>  | 1.06 (1.04-1.07) | 0.1                   |
| KCNQ1         | rs234853        | 11 | 2,850,828   | G | A | 24.8   | 24.8   | 50,790 | 526,120 | 0.00001                | 1.04 (1.02-1.05) | 50,401 | 523,887 | 0.00002                | 1.04 (1.02-1.06) | 0.9                   |
| KCNQ1         | rs2237895       | 11 | 2,857,194   | C | A | 42.6   | 42.6   | 50,790 | 526,120 | 3.6x10 <sup>-42</sup>  | 1.11 (1.09-1.12) | 50,401 | 523,887 | 9.9x10 <sup>-47</sup>  | 1.12 (1.10-1.13) | 0.01                  |
| KCNQ1         | rs2237897       | 11 | 2,858,546   | C | T | 95.4   | 4.57   | 50,791 | 526,121 | 1.3x10 <sup>-28</sup>  | 1.23 (1.19-1.27) | 50,402 | 523,888 | 1.7x10 <sup>-31</sup>  | 1.25 (1.20-1.30) | 0.07                  |
| KCNQ1         | rs445084        | 11 | 2,908,754   | G | A | 36.1   | 36.1   | 50,789 | 526,120 | 0.00005                | 1.03 (1.02-1.05) | 50,401 | 523,887 | 2.4x10 <sup>-6</sup>   | 1.04 (1.02-1.05) | 0.1                   |
| PDE3B         | rs141521721     | 11 | 14,763,828  | A | C | 2.36   | 2.36   | 50,791 | 526,121 | 6.7x10 <sup>-8</sup>   | 1.14 (1.09-1.20) | 50,402 | 523,888 | 5.4x10 <sup>-7</sup>   | 1.14 (1.08-1.19) | 0.7                   |
| KCNJ11        | rs5213          | 11 | 17,408,404  | C | T | 36.2   | 36.2   | 50,789 | 526,119 | 6.8x10 <sup>-18</sup>  | 1.07 (1.05-1.08) | 50,400 | 523,886 | 6.5x10 <sup>-25</sup>  | 1.08 (1.07-1.10) | 0.00002               |
| KCNJ11        | rs67254669      | 11 | 17,470,143  | G | A | 0.110  | 0.110  | 43,879 | 501,587 | 3.2x10 <sup>-8</sup>   | 1.93 (1.53-2.43) | 43,580 | 499,804 | 1.8x10 <sup>-8</sup>   | 1.98 (1.56-2.50) | 0.7                   |
| METTL15       | rs4923543       | 11 | 28,534,898  | A | G | 33.2   | 33.2   | 50,790 | 526,120 | 4.8x10 <sup>-6</sup>   | 1.04 (1.02-1.05) | 50,400 | 523,886 | 4.5x10 <sup>-8</sup>   | 1.04 (1.03-1.06) | 0.02                  |
| QSER1         | rs7943101       | 11 | 32,460,873  | T | C | 16.1   | 16.1   | 50,791 | 526,121 | 0.00005                | 1.04 (1.02-1.06) | 50,402 | 523,888 | 0.00007                | 1.04 (1.02-1.06) | 1                     |
| QSER1         | rs145678014     | 11 | 32,927,778  | G | T | 95.7   | 4.33   | 50,791 | 526,121 | 1.6x10 <sup>-8</sup>   | 1.11 (1.07-1.15) | 50,402 | 523,888 | 1.6x10 <sup>-7</sup>   | 1.10 (1.06-1.15) | 0.5                   |
| QSER1         | rs528122639     | 11 | 33,091,735  | A | G | 0.0900 | 0.0900 | 37,282 | 489,749 | 1.3x10 <sup>-6</sup>   | 2.11 (1.56-2.85) | 41,170 | 492,220 | 0.00001                | 1.97 (1.45-2.68) | 0.3                   |
| PDHX          | rs286925        | 11 | 34,642,668  | A | G | 18.2   | 18.2   | 50,790 | 526,120 | 0.00004                | 1.04 (1.02-1.06) | 50,401 | 523,887 | 0.0001                 | 1.04 (1.02-1.06) | 0.7                   |
| PDHX          | rs2767036       | 11 | 34,982,148  | C | A | 29.1   | 29.1   | 50,789 | 526,120 | 8.8x10 <sup>-8</sup>   | 1.04 (1.03-1.06) | 50,400 | 523,887 | 3.9x10 <sup>-7</sup>   | 1.04 (1.03-1.06) | 0.7                   |
| HSD17B12      | rs1061810       | 11 | 43,877,934  | A | C | 28.8   | 28.8   | 50,791 | 526,121 | 3.9x10 <sup>-9</sup>   | 1.05 (1.03-1.06) | 50,402 | 523,888 | 0.00008                | 1.03 (1.02-1.05) | 0.00006               |
| CRY2          | rs7115753       | 11 | 45,912,013  | A | G | 44.9   | 44.9   | 50,789 | 526,119 | 2.6x10 <sup>-8</sup>   | 1.04 (1.03-1.06) | 50,400 | 523,886 | 9.9x10 <sup>-8</sup>   | 1.04 (1.03-1.06) | 0.8                   |
| CELF1         | rs7124681       | 11 | 47,529,947  | A | C | 41.0   | 41.0   | 50,712 | 521,614 | 2.8x10 <sup>-7</sup>   | 1.04 (1.02-1.05) | 50,323 | 519,381 | 0.008                  | 1.02 (1.01-1.04) | 1.1x10 <sup>-7</sup>  |
| MAP3K11       | rs1783541       | 11 | 65,294,799  | T | C | 20.4   | 20.4   | 50,790 | 526,120 | 5.2x10 <sup>-12</sup>  | 1.06 (1.05-1.08) | 50,401 | 523,887 | 4.4x10 <sup>-9</sup>   | 1.06 (1.04-1.07) | 0.05                  |
| CCND1         | rs61881115      | 11 | 68,997,225  | G | A | 83.8   | 16.2   | 50,791 | 526,120 | 1.2x10 <sup>-6</sup>   | 1.05 (1.03-1.07) | 50,402 | 523,887 | 5.3x10 <sup>-6</sup>   | 1.05 (1.03-1.07) | 0.6                   |
| CCND1         | rs11820019      | 11 | 69,448,758  | T | C | 97.3   | 2.67   | 50,791 | 526,121 | 9.1x10 <sup>-9</sup>   | 1.15 (1.10-1.20) | 50,402 | 523,888 | 1.4x10 <sup>-8</sup>   | 1.15 (1.10-1.21) | 0.9                   |
| CENTD2/ARAP1  | rs77464186      | 11 | 72,460,398  | A | C | 83.6   | 16.4   | 50,790 | 526,121 | 7.6x10 <sup>-27</sup>  | 1.11 (1.09-1.13) | 50,401 | 523,888 | 9.0x10 <sup>-37</sup>  | 1.14 (1.12-1.16) | 4.3x10 <sup>-7</sup>  |
| MTNR1B        | rs10830963      | 11 | 92,708,710  | G | C | 27.7   | 27.7   | 50,791 | 526,120 | 1.7x10 <sup>-40</sup>  | 1.11 (1.10-1.13) | 50,402 | 523,888 | 2.8x10 <sup>-36</sup>  | 1.11 (1.09-1.13) | 0.3                   |
| MTNR1B        | rs57235767      | 11 | 93,013,531  | C | T | 70.6   | 29.4   | 50,791 | 526,120 | 2.9x10 <sup>-9</sup>   | 1.05 (1.03-1.07) | 50,402 | 523,887 | 9.3x10 <sup>-9</sup>   | 1.05 (1.03-1.07) | 0.9                   |
| ETS1          | rs10893829      | 11 | 128,042,575 | T | C | 85.3   | 14.7   | 50,791 | 526,121 | 5.1x10 <sup>-9</sup>   | 1.06 (1.04-1.08) | 50,401 | 523,888 | 7.0x10 <sup>-9</sup>   | 1.06 (1.04-1.08) | 0.8                   |
| ETS1          | rs10750397      | 11 | 128,234,144 | A | G | 28.2   | 28.2   | 50,791 | 526,120 | 1.9x10 <sup>-8</sup>   | 1.05 (1.03-1.06) | 50,402 | 523,887 | 9.8x10 <sup>-9</sup>   | 1.05 (1.03-1.07) | 0.6                   |
| ETS1          | rs67232546      | 11 | 128,398,938 | T | C | 20.7   | 20.7   | 50,791 | 526,121 | 3.0x10 <sup>-10</sup>  | 1.06 (1.04-1.08) | 50,402 | 523,888 | 9.5x10 <sup>-10</sup>  | 1.06 (1.04-1.08) | 1                     |
| ETS1          | rs112595469     | 11 | 128,583,975 | T | C | 2.84   | 2.84   | 50,791 | 526,121 | 0.0002                 | 1.09 (1.04-1.14) | 50,402 | 523,888 | 0.002                  | 1.07 (1.03-1.12) | 0.2                   |
| CCND2         | rs10848958      |    |             |   |   |        |        |        |         |                        |                  |        |         |                        |                  |                       |



|             |             |    |             |   |   |        |        |        |         |                       |                  |        |         |                       |                  |                       |
|-------------|-------------|----|-------------|---|---|--------|--------|--------|---------|-----------------------|------------------|--------|---------|-----------------------|------------------|-----------------------|
| HMGA2       | rs1042725   | 12 | 66,358,347  | T | C | 49.0   | 49.0   | 50,790 | 526,120 | 8.0x10 <sup>-15</sup> | 1.06 (1.04-1.07) | 50,401 | 523,887 | 2.9x10 <sup>-15</sup> | 1.06 (1.05-1.08) | 0.5                   |
| TSPAN8/LGR5 | rs1796330   | 12 | 71,522,953  | G | C | 57.1   | 42.9   | 50,791 | 526,120 | 2.5x10 <sup>-11</sup> | 1.05 (1.03-1.07) | 50,402 | 523,887 | 1.0x10 <sup>-11</sup> | 1.05 (1.04-1.07) | 0.5                   |
| USP44       | rs2197973   | 12 | 95,928,560  | T | C | 53.8   | 46.3   | 50,789 | 526,120 | 9.5x10 <sup>-9</sup>  | 1.04 (1.03-1.06) | 50,400 | 523,886 | 6.6x10 <sup>-6</sup>  | 1.03 (1.02-1.05) | 0.02                  |
| RMST        | rs759114467 | 12 | 97,562,756  | A | G | 0.0300 | 0.0300 | 29,460 | 449,523 | 0.02                  | 2.08 (1.10-3.95) | 29,264 | 448,156 | 0.03                  | 2.03 (1.05-3.90) | 0.9                   |
| RMST        | rs557027608 | 12 | 97,779,248  | A | G | 0.0600 | 0.0600 | 21,106 | 438,604 | 0.002                 | 2.11 (1.31-3.42) | 20,927 | 436,945 | 0.0009                | 2.23 (1.39-3.59) | 0.6                   |
| RMST        | rs77864822  | 12 | 97,848,775  | A | G | 93.2   | 6.76   | 50,791 | 526,121 | 4.0x10 <sup>-6</sup>  | 1.07 (1.04-1.10) | 50,402 | 523,888 | 2.5x10 <sup>-7</sup>  | 1.08 (1.05-1.11) | 0.2                   |
| WSCD2       | rs1426371   | 12 | 108,629,780 | G | A | 73.9   | 26.1   | 50,791 | 526,121 | 3.3x10 <sup>-11</sup> | 1.06 (1.04-1.07) | 50,402 | 523,888 | 3.5x10 <sup>-9</sup>  | 1.05 (1.03-1.07) | 0.2                   |
| KSR2        | rs34965774  | 12 | 118,412,373 | A | G | 14.4   | 14.4   | 50,791 | 526,121 | 0.00002               | 1.05 (1.02-1.07) | 50,402 | 523,888 | 0.00002               | 1.05 (1.03-1.07) | 0.6                   |
| KSR2        | rs12578639  | 12 | 118,489,636 | A | T | 82.8   | 17.2   | 50,791 | 526,121 | 0.00001               | 1.04 (1.02-1.06) | 50,402 | 523,888 | 1.3x10 <sup>-7</sup>  | 1.05 (1.03-1.07) | 0.02                  |
| HNF1A       | rs11065299  | 12 | 121,297,815 | A | G | 7.54   | 7.54   | 50,791 | 526,121 | 3.0x10 <sup>-7</sup>  | 1.07 (1.05-1.10) | 50,402 | 523,888 | 0.00001               | 1.06 (1.03-1.09) | 0.1                   |
| HNF1A       | rs73226260  | 12 | 121,380,541 | G | A | 96.7   | 3.31   | 50,791 | 526,121 | 1.6x10 <sup>-8</sup>  | 1.12 (1.08-1.17) | 50,402 | 523,888 | 4.3x10 <sup>-9</sup>  | 1.13 (1.09-1.18) | 0.4                   |
| HNF1A       | rs1800574   | 12 | 121,416,864 | T | C | 2.96   | 2.96   | 50,791 | 526,121 | 3.5x10 <sup>-11</sup> | 1.15 (1.10-1.20) | 50,402 | 523,888 | 5.7x10 <sup>-12</sup> | 1.16 (1.11-1.21) | 0.3                   |
| HNF1A       | rs56348580  | 12 | 121,432,117 | G | C | 68.9   | 31.1   | 50,791 | 526,121 | 6.5x10 <sup>-13</sup> | 1.06 (1.04-1.07) | 50,402 | 523,888 | 2.0x10 <sup>-10</sup> | 1.05 (1.04-1.07) | 0.1                   |
| HNF1A       | rs28638142  | 12 | 121,501,461 | A | C | 4.42   | 4.42   | 50,791 | 526,121 | 2.1x10 <sup>-6</sup>  | 1.09 (1.05-1.13) | 50,402 | 523,888 | 5.0x10 <sup>-6</sup>  | 1.09 (1.05-1.13) | 0.9                   |
| HNF1A       | rs73224262  | 12 | 121,882,395 | T | C | 0.680  | 0.680  | 50,791 | 526,121 | 0.00002               | 1.23 (1.12-1.35) | 50,402 | 523,888 | 5.0x10 <sup>-6</sup>  | 1.25 (1.14-1.38) | 0.4                   |
| MPHOSPH9    | rs4148856   | 12 | 123,450,765 | C | G | 78.1   | 21.9   | 50,789 | 526,119 | 1.4x10 <sup>-8</sup>  | 1.05 (1.03-1.07) | 50,400 | 523,886 | 5.7x10 <sup>-9</sup>  | 1.06 (1.04-1.07) | 0.4                   |
| ZNF664      | rs7978610   | 12 | 124,468,572 | G | C | 66.6   | 33.5   | 50,789 | 526,121 | 9.5x10 <sup>-6</sup>  | 1.03 (1.02-1.05) | 50,400 | 523,888 | 7.7x10 <sup>-10</sup> | 1.05 (1.03-1.07) | 0.00004               |
| ZNF664      | rs825452    | 12 | 124,509,177 | A | G | 60.3   | 39.7   | 50,790 | 526,120 | 0.00005               | 1.03 (1.02-1.05) | 50,400 | 523,887 | 8.9x10 <sup>-9</sup>  | 1.04 (1.03-1.06) | 0.00006               |
| FBRSL1      | rs12811407  | 12 | 133,069,698 | A | G | 33.1   | 33.1   | 50,791 | 526,120 | 2.4x10 <sup>-10</sup> | 1.05 (1.03-1.07) | 50,402 | 523,887 | 5.4x10 <sup>-8</sup>  | 1.04 (1.03-1.06) | 0.1                   |
| RNF6        | rs34584161  | 13 | 26,776,999  | A | G | 76.0   | 24.0   | 50,791 | 526,121 | 1.9x10 <sup>-7</sup>  | 1.05 (1.02-1.06) | 50,402 | 523,888 | 1.05 (1.03-1.07)      | 1.05 (1.03-1.07) | 0.09                  |
| HMGB1       | rs11842871  | 13 | 31,042,452  | G | T | 73.5   | 26.6   | 50,791 | 526,121 | 7.9x10 <sup>-8</sup>  | 1.05 (1.03-1.06) | 50,402 | 523,888 | 0.00001               | 1.04 (1.02-1.06) | 0.06                  |
| KL          | rs576674    | 13 | 33,554,302  | G | A | 16.9   | 16.9   | 50,791 | 526,121 | 2.6x10 <sup>-6</sup>  | 1.05 (1.03-1.07) | 50,402 | 523,888 | 1.3x10 <sup>-7</sup>  | 1.05 (1.03-1.08) | 0.1                   |
| DLEU1       | rs963740    | 13 | 51,096,095  | A | T | 71.3   | 28.7   | 50,791 | 526,120 | 4.7x10 <sup>-7</sup>  | 1.04 (1.02-1.06) | 50,402 | 523,887 | 1.4x10 <sup>-8</sup>  | 1.05 (1.03-1.06) | 0.09                  |
| PCDH17      | rs9537803   | 13 | 58,366,634  | C | T | 27.7   | 27.7   | 50,789 | 526,120 | 6.1x10 <sup>-7</sup>  | 1.04 (1.02-1.06) | 50,400 | 523,887 | 0.0003                | 1.03 (1.01-1.05) | 0.006                 |
| PCDH17      | rs9569864   | 13 | 58,965,435  | C | T | 82.5   | 17.5   | 50,789 | 526,121 | 9.7x10 <sup>-10</sup> | 1.06 (1.04-1.08) | 50,400 | 523,888 | 2.9x10 <sup>-7</sup>  | 1.05 (1.03-1.07) | 0.07                  |
| SRGAP2D     | rs9563615   | 13 | 59,077,406  | A | T | 71.0   | 29.0   | 50,791 | 526,121 | 9.8x10 <sup>-10</sup> | 1.05 (1.03-1.07) | 50,402 | 523,887 | 4.0x10 <sup>-6</sup>  | 1.04 (1.02-1.06) | 0.002                 |
| SRGAP2D     | rs76251711  | 13 | 59,184,234  | G | A | 1.26   | 1.26   | 50,379 | 525,731 | 0.00006               | 1.16 (1.08-1.24) | 49,990 | 523,498 | 0.00009               | 1.15 (1.07-1.24) | 1                     |
| SPRY2       | rs1359790   | 13 | 80,717,156  | G | A | 72.0   | 28.0   | 50,790 | 526,121 | 3.8x10 <sup>-25</sup> | 1.09 (1.07-1.10) | 50,402 | 523,888 | 6.5x10 <sup>-28</sup> | 1.10 (1.08-1.11) | 0.06                  |
| IRS2        | rs7987740   | 13 | 109,947,213 | T | C | 60.9   | 39.1   | 50,790 | 526,120 | 3.0x10 <sup>-7</sup>  | 1.04 (1.02-1.05) | 50,402 | 523,887 | 3.4x10 <sup>-6</sup>  | 1.04 (1.02-1.05) | 0.4                   |
| IRS2        | rs4771648   | 13 | 110,431,626 | G | A | 66.9   | 33.2   | 50,791 | 526,121 | 1.8x10 <sup>-6</sup>  | 1.04 (1.02-1.05) | 50,402 | 523,888 | 2.2x10 <sup>-6</sup>  | 1.04 (1.02-1.06) | 0.8                   |
| SLC7A7      | rs17122772  | 14 | 23,288,935  | G | C | 22.8   | 22.8   | 50,791 | 526,121 | 5.7x10 <sup>-8</sup>  | 1.05 (1.03-1.07) | 50,402 | 523,888 | 8.0x10 <sup>-9</sup>  | 1.05 (1.04-1.07) | 0.3                   |
| AKAP6       | rs17522122  | 14 | 33,302,882  | T | G | 47.4   | 47.4   | 50,790 | 526,119 | 9.4x10 <sup>-7</sup>  | 1.04 (1.02-1.05) | 50,400 | 523,886 | 0.007                 | 1.02 (1.01-1.04) | 3.2x10 <sup>-6</sup>  |
| CLEC14A     | rs8017808   | 14 | 38,848,419  | G | T | 74.3   | 25.7   | 50,791 | 526,121 | 3.5x10 <sup>-7</sup>  | 1.04 (1.03-1.06) | 50,402 | 523,888 | 3.7x10 <sup>-8</sup>  | 1.05 (1.03-1.07) | 0.2                   |
| NRXN3       | rs17836088  | 14 | 79,932,041  | C | G | 21.7   | 21.7   | 50,790 | 526,121 | 6.9x10 <sup>-13</sup> | 1.07 (1.05-1.08) | 50,402 | 523,888 | 0.00002               | 1.04 (1.02-1.06) | 1.3x10 <sup>-9</sup>  |
| SMEK1       | rs8010382   | 14 | 91,963,722  | G | A | 42.1   | 42.1   | 50,791 | 526,120 | 1.5x10 <sup>-7</sup>  | 1.04 (1.03-1.06) | 50,401 | 523,887 | 2.6x10 <sup>-7</sup>  | 1.04 (1.03-1.06) | 0.9                   |
| MARK3       | rs62007683  | 14 | 103,894,071 | G | T | 65.3   | 34.7   | 50,790 | 526,120 | 3.1x10 <sup>-7</sup>  | 1.04 (1.02-1.06) | 50,401 | 523,887 | 0.00009               | 1.03 (1.02-1.05) | 0.2                   |
| RASGRP1     | rs8032939   | 15 | 38,834,033  | C | T | 24.6   | 24.6   | 50,790 | 526,121 | 3.6x10 <sup>-8</sup>  | 1.05 (1.03-1.06) | 50,402 | 523,888 | 9.2x10 <sup>-7</sup>  | 1.04 (1.03-1.06) | 0.3                   |
| RASGRP1     | rs34715063  | 15 | 38,873,115  | C | T | 12.4   | 12.4   | 50,791 | 526,121 | 6.3x10 <sup>-13</sup> | 1.09 (1.06-1.11) | 50,402 | 523,888 | 3.7x10 <sup>-13</sup> | 1.09 (1.06-1.11) | 0.7                   |
| LTK         | rs11070332  | 15 | 41,809,205  | A | G | 35.8   | 35.8   | 50,791 | 526,119 | 9.4x10 <sup>-12</sup> | 1.05 (1.04-1.07) | 50,402 | 523,887 | 9.6x10 <sup>-10</sup> | 1.05 (1.03-1.07) | 0.2                   |
| LTK         | rs543786825 | 15 | 42,201,410  | T | C | 0.0400 | 0.0400 | 27,464 | 464,313 | 1.9x10 <sup>-6</sup>  | 3.52 (2.10-5.91) | 27,253 | 462,639 | 2.2x10 <sup>-7</sup>  | 3.96 (2.35-6.67) | 0.3                   |
| ONECUT1     | rs2456530   | 15 | 53,091,553  | T | C | 12.7   | 12.7   | 50,791 | 526,121 | 1.3x10 <sup>-9</sup>  | 1.07 (1.05-1.09) | 50,402 | 523,888 | 1.1x10 <sup>-6</sup>  | 1.06 (1.03-1.08) | 0.02                  |
| WDR72       | rs528350911 | 15 | 53,747,228  | G | C | 0.680  | 0.680  | 50,791 | 526,121 | 0.00001               | 1.25 (1.13-1.38) | 50,402 | 523,888 | 8.1x10 <sup>-8</sup>  | 1.32 (1.19-1.46) | 0.02                  |
| TCF12       | rs117483894 | 15 | 57,456,802  | G | A | 3.69   | 3.69   | 50,789 | 526,120 | 2.0x10 <sup>-6</sup>  | 1.10 (1.06-1.14) | 50,400 | 523,887 | 0.00006               | 1.09 (1.04-1.13) | 0.2                   |
| C2CD4A/B    | rs8037894   | 15 | 62,394,264  | G | C | 56.6   | 43.4   | 50,789 | 526,120 | 1.7x10 <sup>-9</sup>  | 1.05 (1.03-1.06) | 50,400 | 523,887 | 4.4x10 <sup>-10</sup> | 1.05 (1.03-1.06) | 0.5                   |
| USP3        | rs7178762   | 15 | 63,871,292  | C | T | 46.0   | 46.0   | 50,791 | 526,121 | 6.9x10 <sup>-9</sup>  | 1.04 (1.03-1.06) | 50,402 | 523,888 | 4.4x10 <sup>-9</sup>  | 1.04 (1.03-1.06) | 0.6                   |
| MAP2K5      | rs4776970   | 15 | 68,080,886  | A | T | 64.1   | 35.9   | 50,791 | 526,121 | 5.4x10 <sup>-7</sup>  | 1.04 (1.02-1.05) | 50,402 | 523,888 | 0.08                  | 1.01 (1.00-1.03) | 2.0x10 <sup>-12</sup> |
| PTNP9       | rs13737     | 15 | 75,932,129  | G | T | 75.9   | 24.1   | 50,791 | 526,121 | 5.2x10 <sup>-10</sup> | 1.05 (1.04-1.07) | 50,402 | 523,888 | 1.1x10 <sup>-8</sup>  | 1.05 (1.03-1.07) | 0.5                   |
| HMG20A      | rs1005752   | 15 | 77,818,128  | A | C | 71.5   | 28.5   | 50,789 | 526,119 | 1.4x10 <sup>-21</sup> | 1.08 (1.06-1.10) | 50,400 | 523,886 | 7.8x10 <sup>-18</sup> | 1.07 (1.06-1.09) | 0.1                   |
| AP3S2       | rs4932265   | 15 | 90,423,293  | T | C | 26.7   | 26.7   | 50,789 | 526,119 | 6.6x10 <sup>-17</sup> | 1.07 (1.05-1.09) | 50,400 | 523,886 | 7.7x10 <sup>-20</sup> | 1.08 (1.06-1.10) | 0.02                  |
| PRC1        | rs12910825  | 15 | 91,511,260  | G | A | 36.1   | 36.1   | 50,790 | 526,119 | 8.1x10 <sup>-16</sup> | 1.06 (1.05-1.08) | 50,401 | 523,886 | 2.2x10 <sup>-14</sup> | 1.06 (1.04-1.08) | 0.5                   |
| ITFG3       | rs6600191   | 16 | 295,795     | T | C | 82.5   | 17.5   | 50,791 | 526,121 | 1.6x10 <sup>-12</sup> | 1.07 (1.05-1.09) | 50,402 | 523,888 | 3.8x10 <sup>-11</sup> | 1.07 (1.05-1.09) | 0.5                   |
| CLUAP1      | rs3751837   | 16 | 3,583,173   | T | C | 22.0   | 22.0   | 50,789 | 526,121 | 6.1x10 <sup>-7</sup>  | 1.04 (1.03-1.06) | 50,400 | 523,888 | 0.0009                | 1.03 (1.01-1.05) | 0.0005                |
| ATP2A1      | rs8046545   | 16 | 28,915,217  | G | A | 35.9   | 35.9   | 50,789 | 526,119 | 1.5x10 <sup>-7</sup>  | 1.04 (1.03-1.06) | 50,400 | 523,886 | 0.1                   | 1.01 (1.00-1.03) | 9.1x10 <sup>-16</sup> |
| FAM57B      | rs11642430  | 16 | 30,045,789  | G | C | 39.9   | 39.9   | 50,790 | 526,120 | 1.8x10 <sup>-7</sup>  | 1.04 (1.02-1.05) | 50,401 | 523,887 | 0.008                 | 1.02 (1.01-1.04) | 6.9x10 <sup>-8</sup>  |
| FAM57B      | rs199795270 | 16 | 30,419,384  | C | G | 0.650  | 0.650  | 49,414 | 518,760 | 2.6x10 <sup>-8</sup>  | 1.31 (1.19-1.43) | 49,105 | 521,045 | 7.2x10 <sup>-7</sup>  | 1.27 (1.16-1.40) | 0.2                   |
| FTO         | rs4281707   | 16 | 53,501,946  | G | A | 54.4   | 45.6   | 50,791 | 526,121 | 7.5x10 <sup>-6</sup>  | 1.03 (1.02-1.05) | 50,402 | 523,888 | 7.5x10 <sup>-6</sup>  | 1.03 (1.02-1.05) | 0.8                   |
| FTO         | rs78020297  | 16 | 53,758,720  | A | G | 5.17   | 5.17   | 50,791 | 526,121 | 0.01                  | 1.04 (1.01-1.08) | 50,402 | 523,888 | 0.2                   | 1.02 (0.99-1.06) | 0.01                  |
| FTO         | rs1421085   | 16 | 53,800,954  | C | T | 41.5   | 41.5   | 50,790 | 526,121 | 1.1x10 <sup>-60</sup> | 1.13 (1.11-1.15) | 50,401 | 523,887 | 9.9x10 <sup>-13</sup> | 1.06 (1.04-1.07) | 8.3x10 <sup>-88</sup> |
| NFAT5       | rs862320    | 16 | 69,651,866  | C | T | 57.8   | 42.2   | 50,790 | 526,120 | 1.3x10 <sup>-12</sup> | 1.05 (1.04-1.07) | 50,401 | 523,887 | 1.5x10 <sup>-7</sup>  | 1.04 (1.03-1.06) | 0.0002                |
| BCAR1       | rs72802342  | 16 | 75,234,872  | C | A | 92.3   | 7.69   | 50,791 | 526,121 | 5.1x10 <sup>-25</sup> | 1.15 (1.12-1.19) | 50,402 | 523,888 | 2.7x10 <sup>-29</sup> | 1.17 (1.14-1.21) | 0.007                 |
| BCAR1       | rs3115960   | 16 | 75,516,534  | G | C | 37.0   | 37.0   | 50,789 | 526,119 | 0.4                   | 1.01 (0.99-1.02) | 50,400 | 523,886 | 0.1                   | 1.01 (1.00-1.03) | 0.1                   |
|             |             |    |             |   |   |        |        |        |         |                       |                  |        |         |                       |                  |                       |

|             |             |    |            |   |   |        |        |        |         |                       |                  |        |         |                       |                  |                       |
|-------------|-------------|----|------------|---|---|--------|--------|--------|---------|-----------------------|------------------|--------|---------|-----------------------|------------------|-----------------------|
| HNF1B       | rs10962     | 17 | 36,046,451 | C | G | 22.6   | 22.6   | 50,791 | 526,121 | 4.4x10 <sup>-8</sup>  | 1.05 (1.03-1.07) | 50,402 | 523,888 | 1.0x10 <sup>-8</sup>  | 1.05 (1.04-1.07) | 0.4                   |
| HNF1B       | rs2189301   | 17 | 36,063,685 | G | A | 87.2   | 12.8   | 50,791 | 526,121 | 4.3x10 <sup>-6</sup>  | 1.05 (1.03-1.07) | 50,402 | 523,888 | 0.00002               | 1.05 (1.03-1.07) | 0.7                   |
| HNF1B       | rs10908278  | 17 | 36,099,952 | T | A | 48.1   | 48.1   | 50,790 | 526,121 | 1.3x10 <sup>-25</sup> | 1.08 (1.06-1.10) | 50,401 | 523,888 | 2.6x10 <sup>-31</sup> | 1.09 (1.08-1.11) | 0.003                 |
| MLX         | rs34855406  | 17 | 40,731,411 | C | G | 27.7   | 27.7   | 50,790 | 526,121 | 1.0x10 <sup>-9</sup>  | 1.05 (1.03-1.07) | 50,402 | 523,887 | 6.9x10 <sup>-8</sup>  | 1.05 (1.03-1.06) | 0.2                   |
| TLL6        | rs35895680  | 17 | 47,060,322 | C | A | 67.8   | 32.2   | 50,791 | 526,121 | 5.7x10 <sup>-12</sup> | 1.06 (1.04-1.07) | 50,402 | 523,887 | 1.4x10 <sup>-7</sup>  | 1.04 (1.03-1.06) | 0.001                 |
| KIF2B       | rs569511541 | 17 | 52,140,805 | G | A | 0.0200 | 0.0200 | 19,119 | 423,698 | 5.5x10 <sup>-7</sup>  | 9.88 (4.03-24.2) | 18,984 | 422,385 | 5.5x10 <sup>-7</sup>  | 9.64 (3.97-23.4) | 0.9                   |
| ACE         | rs2727301   | 17 | 61,965,043 | T | C | 75.4   | 24.6   | 50,791 | 526,120 | 0.0002                | 1.03 (1.01-1.05) | 50,402 | 523,887 | 0.01                  | 1.02 (1.01-1.04) | 0.02                  |
| ACE         | rs60276348  | 17 | 62,203,304 | T | C | 14.0   | 14.0   | 50,791 | 526,121 | 7.6x10 <sup>-7</sup>  | 1.05 (1.03-1.08) | 50,402 | 523,888 | 3.5x10 <sup>-6</sup>  | 1.05 (1.03-1.08) | 0.6                   |
| BPTF        | rs11657492  | 17 | 65,648,427 | G | T | 10.0   | 10.0   | 50,791 | 526,121 | 8.9x10 <sup>-6</sup>  | 1.06 (1.03-1.08) | 50,402 | 523,888 | 5.7x10 <sup>-7</sup>  | 1.06 (1.04-1.09) | 0.1                   |
| BPTF        | rs558308082 | 17 | 65,820,153 | C | G | 0.0800 | 0.0800 | 40,565 | 490,234 | 9.3x10 <sup>-7</sup>  | 2.28 (1.64-3.16) | 40,266 | 488,451 | 1.8x10 <sup>-6</sup>  | 2.26 (1.62-3.17) | 0.9                   |
| BPTF        | rs61676547  | 17 | 65,892,507 | C | G | 19.2   | 19.2   | 50,791 | 526,121 | 4.0x10 <sup>-8</sup>  | 1.05 (1.03-1.07) | 50,402 | 523,888 | 0.00009               | 1.04 (1.02-1.06) | 0.002                 |
| LAMA1       | rs7240767   | 18 | 7,070,642  | C | T | 37.6   | 37.6   | 50,789 | 526,121 | 0.00002               | 1.03 (1.02-1.05) | 50,400 | 523,888 | 3.8x10 <sup>-7</sup>  | 1.04 (1.02-1.06) | 0.04                  |
| COMMD9      | rs62080313  | 18 | 36,278,709 | C | T | 12.3   | 12.3   | 50,791 | 526,120 | 2.7x10 <sup>-7</sup>  | 1.06 (1.04-1.08) | 50,401 | 523,887 | 0.00002               | 1.05 (1.03-1.07) | 0.06                  |
| TCF4        | rs76197067  | 18 | 52,604,955 | G | A | 0.0500 | 0.0500 | 32,635 | 460,131 | 0.0002                | 2.48 (1.54-4.01) | 32,386 | 458,398 | 0.0002                | 2.53 (1.56-4.11) | 0.9                   |
| TCF4        | rs72926932  | 18 | 53,050,646 | C | A | 8.39   | 8.39   | 50,791 | 526,121 | 2.3x10 <sup>-10</sup> | 1.09 (1.06-1.11) | 50,402 | 523,888 | 3.6x10 <sup>-11</sup> | 1.09 (1.06-1.12) | 0.3                   |
| TCF4        | rs28719468  | 18 | 53,452,144 | C | T | 15.9   | 15.9   | 50,791 | 526,121 | 0.0001                | 1.04 (1.02-1.06) | 50,401 | 523,888 | 0.0008                | 1.03 (1.01-1.06) | 0.4                   |
| WDR7        | rs17684074  | 18 | 54,675,384 | G | C | 74.0   | 26.0   | 50,790 | 526,121 | 2.4x10 <sup>-7</sup>  | 1.04 (1.03-1.06) | 50,401 | 523,888 | 5.8x10 <sup>-6</sup>  | 1.04 (1.02-1.06) | 0.3                   |
| GRP         | rs9957145   | 18 | 56,876,228 | G | A | 82.9   | 17.1   | 50,791 | 526,121 | 3.4x10 <sup>-7</sup>  | 1.05 (1.03-1.07) | 50,402 | 523,888 | 0.0008                | 1.03 (1.01-1.05) | 0.0002                |
| MC4R        | rs523288    | 18 | 57,848,369 | T | A | 23.8   | 23.8   | 50,790 | 526,121 | 1.7x10 <sup>-12</sup> | 1.06 (1.04-1.08) | 50,401 | 523,888 | 0.04                  | 1.02 (1.00-1.04) | 8.3x10 <sup>-28</sup> |
| MC4R        | rs74452128  | 18 | 58,056,566 | C | A | 97.6   | 2.37   | 50,791 | 526,121 | 8.8x10 <sup>-7</sup>  | 1.14 (1.08-1.20) | 50,402 | 523,888 | 0.09                  | 1.05 (0.99-1.10) | 2.2x10 <sup>-12</sup> |
| BCL2A       | rs10469140  | 18 | 60,668,270 | G | A | 48.5   | 48.5   | 50,789 | 526,119 | 1.5x10 <sup>-6</sup>  | 1.04 (1.02-1.05) | 50,400 | 523,886 | 5.7x10 <sup>-7</sup>  | 1.04 (1.02-1.05) | 0.5                   |
| BCL2A       | rs12454712  | 18 | 60,845,884 | T | C | 61.4   | 38.6   | 50,790 | 526,120 | 4.7x10 <sup>-13</sup> | 1.06 (1.04-1.07) | 50,401 | 523,887 | 5.6x10 <sup>-19</sup> | 1.07 (1.06-1.09) | 0.00004               |
| UHRF1       | rs7249758   | 19 | 4,948,862  | A | G | 20.4   | 20.4   | 50,791 | 526,120 | 5.0x10 <sup>-8</sup>  | 1.05 (1.03-1.07) | 50,402 | 523,887 | 5.7x10 <sup>-7</sup>  | 1.05 (1.03-1.07) | 0.5                   |
| PTPRS       | rs116953931 | 19 | 5,224,998  | A | G | 3.71   | 3.71   | 50,791 | 526,121 | 0.001                 | 1.06 (1.02-1.11) | 50,402 | 523,888 | 0.003                 | 1.06 (1.02-1.10) | 0.7                   |
| INSR        | rs75253922  | 19 | 7,240,848  | C | T | 19.1   | 19.1   | 50,791 | 526,121 | 5.0x10 <sup>-8</sup>  | 1.05 (1.03-1.07) | 50,402 | 523,888 | 1.1x10 <sup>-8</sup>  | 1.06 (1.04-1.08) | 0.4                   |
| MAP2K7      | rs4804833   | 19 | 7,970,635  | A | G | 39.0   | 39.0   | 50,791 | 526,121 | 3.3x10 <sup>-13</sup> | 1.06 (1.04-1.07) | 50,402 | 523,888 | 1.6x10 <sup>-12</sup> | 1.06 (1.04-1.07) | 1                     |
| FARSA       | rs755734872 | 19 | 12,938,471 | T | C | 0.0500 | 0.0500 | 27,464 | 464,313 | 0.00002               | 2.37 (1.59-3.53) | 27,253 | 462,639 | 0.00007               | 2.25 (1.51-3.34) | 0.6                   |
| FARSA       | rs3111316   | 19 | 13,038,415 | A | G | 58.9   | 41.2   | 50,789 | 526,121 | 1.6x10 <sup>-12</sup> | 1.05 (1.04-1.07) | 50,400 | 523,888 | 1.6x10 <sup>-11</sup> | 1.05 (1.04-1.07) | 0.7                   |
| TM6SF2      | rs8107974   | 19 | 19,388,500 | T | A | 7.69   | 7.69   | 50,790 | 526,120 | 8.7x10 <sup>-15</sup> | 1.11 (1.08-1.14) | 50,401 | 523,886 | 8.0x10 <sup>-18</sup> | 1.13 (1.10-1.16) | 0.02                  |
| TM6SF2      | rs188247550 | 19 | 19,396,616 | T | C | 1.95   | 1.95   | 50,379 | 525,731 | 0.00008               | 1.14 (1.07-1.22) | 49,990 | 523,498 | 0.0004                | 1.13 (1.06-1.21) | 0.5                   |
| PEPD        | rs10406327  | 19 | 33,890,838 | C | G | 52.3   | 47.7   | 50,791 | 526,120 | 3.3x10 <sup>-9</sup>  | 1.04 (1.03-1.06) | 50,401 | 523,887 | 3.0x10 <sup>-9</sup>  | 1.05 (1.03-1.06) | 0.7                   |
| TOMM40/APOE | rs745933616 | 19 | 44,938,870 | A | G | 0.130  | 0.130  | 37,999 | 484,304 | 0.0002                | 1.57 (1.24-1.99) | 37,635 | 482,117 | 0.001                 | 1.49 (1.17-1.89) | 0.3                   |
| TOMM40/APOE | rs429358    | 19 | 45,411,941 | T | C | 84.6   | 15.4   | 50,791 | 526,121 | 2.4x10 <sup>-10</sup> | 1.07 (1.05-1.09) | 50,402 | 523,888 | 0.00001               | 1.05 (1.03-1.07) | 0.00003               |
| GIPR        | rs10406431  | 19 | 46,157,019 | A | G | 56.3   | 43.8   | 50,791 | 526,120 | 8.2x10 <sup>-17</sup> | 1.06 (1.05-1.08) | 50,402 | 523,887 | 1.8x10 <sup>-14</sup> | 1.06 (1.04-1.07) | 0.3                   |
| GIPR        | rs2238689   | 19 | 46,178,661 | C | T | 41.8   | 41.8   | 50,790 | 526,120 | 8.7x10 <sup>-15</sup> | 1.06 (1.04-1.07) | 50,401 | 523,887 | 1.4x10 <sup>-11</sup> | 1.08 (1.06-1.09) | 8.6x10 <sup>-6</sup>  |
| GIPR        | rs533172266 | 19 | 46,351,837 | T | C | 0.0600 | 0.0600 | 38,550 | 479,092 | 3.8x10 <sup>-6</sup>  | 2.38 (1.65-3.44) | 38,251 | 477,309 | 0.00007               | 2.14 (1.47-3.11) | 0.2                   |
| ZC3H4       | rs3810291   | 19 | 47,569,003 | A | G | 67.3   | 32.7   | 50,790 | 526,120 | 5.8x10 <sup>-12</sup> | 1.06 (1.04-1.07) | 50,401 | 523,887 | 0.0001                | 1.03 (1.02-1.05) | 1.5x10 <sup>-10</sup> |
| NKX2.2      | rs13041756  | 20 | 21,466,795 | C | T | 10.7   | 10.7   | 50,791 | 526,121 | 0.0001                | 1.05 (1.02-1.07) | 50,402 | 523,888 | 0.009                 | 1.03 (1.01-1.06) | 0.01                  |
| RALY        | rs2268078   | 20 | 32,596,704 | A | G | 65.7   | 34.3   | 50,789 | 526,119 | 3.3x10 <sup>-7</sup>  | 1.04 (1.02-1.06) | 50,400 | 523,887 | 0.00001               | 1.03 (1.02-1.05) | 0.2                   |
| HNF4A       | rs76811102  | 20 | 42,905,415 | T | C | 4.24   | 4.24   | 50,791 | 526,121 | 0.00006               | 1.08 (1.04-1.12) | 50,402 | 523,888 | 0.0001                | 1.08 (1.04-1.12) | 0.9                   |
| HNF4A       | rs4810426   | 20 | 43,001,721 | T | C | 10.6   | 10.6   | 50,791 | 526,121 | 1.0x10 <sup>-14</sup> | 1.10 (1.07-1.12) | 50,402 | 523,888 | 2.4x10 <sup>-16</sup> | 1.10 (1.08-1.13) | 0.1                   |
| HNF4A       | rs191830490 | 20 | 43,023,355 | G | A | 99.4   | 0.590  | 50,641 | 524,228 | 0.00005               | 1.24 (1.12-1.37) | 50,252 | 521,995 | 0.00002               | 1.26 (1.13-1.39) | 0.6                   |
| HNF4A       | rs1800961   | 20 | 43,042,364 | T | C | 3.53   | 3.53   | 50,791 | 526,121 | 1.1x10 <sup>-16</sup> | 1.18 (1.14-1.23) | 50,402 | 523,888 | 9.2x10 <sup>-18</sup> | 1.20 (1.15-1.25) | 0.3                   |
| HNF4A       | rs11696357  | 20 | 43,233,649 | A | G | 93.4   | 6.60   | 50,791 | 526,121 | 0.0006                | 1.06 (1.02-1.09) | 50,402 | 523,888 | 0.00002               | 1.07 (1.04-1.10) | 0.05                  |
| EYA2        | rs560716466 | 20 | 45,317,678 | A | G | 0.310  | 0.310  | 46,413 | 510,576 | 0.0002                | 1.41 (1.18-1.68) | 45,861 | 507,192 | 0.0001                | 1.42 (1.19-1.70) | 0.8                   |
| EYA2        | rs6063048   | 20 | 45,598,564 | G | A | 72.5   | 27.5   | 50,791 | 526,120 | 1.1x10 <sup>-8</sup>  | 1.05 (1.03-1.06) | 50,402 | 523,887 | 2.4x10 <sup>-10</sup> | 1.05 (1.04-1.07) | 0.09                  |
| CEBPB       | rs11699802  | 20 | 48,832,135 | C | T | 53.6   | 46.4   | 50,790 | 526,120 | 1.7x10 <sup>-12</sup> | 1.05 (1.04-1.07) | 50,400 | 523,886 | 1.0x10 <sup>-13</sup> | 1.06 (1.04-1.07) | 0.2                   |
| TSHZ2       | rs34454109  | 20 | 51,223,594 | A | T | 77.1   | 22.9   | 50,789 | 526,121 | 3.8x10 <sup>-7</sup>  | 1.05 (1.03-1.06) | 50,401 | 523,887 | 0.001                 | 1.03 (1.01-1.05) | 0.0003                |
| GNAS        | rs6070625   | 20 | 57,394,628 | G | C | 51.7   | 48.3   | 50,791 | 526,119 | 5.1x10 <sup>-12</sup> | 1.05 (1.04-1.07) | 50,402 | 523,886 | 1.4x10 <sup>-11</sup> | 1.05 (1.04-1.07) | 0.9                   |
| GNAS        | rs862016    | 20 | 57,551,099 | G | A | 7.83   | 7.83   | 50,789 | 526,119 | 0.00003               | 1.06 (1.03-1.09) | 50,400 | 523,886 | 0.0004                | 1.05 (1.02-1.08) | 0.3                   |
| ZBTB46      | rs6011155   | 20 | 62,450,664 | T | C | 63.0   | 37.0   | 50,791 | 526,120 | 3.8x10 <sup>-7</sup>  | 1.04 (1.02-1.05) | 50,402 | 523,887 | 1.8x10 <sup>-6</sup>  | 1.04 (1.02-1.05) | 0.7                   |
| TCEA2       | rs59944054  | 20 | 62,693,175 | A | G | 23.8   | 23.8   | 50,791 | 526,121 | 0.00006               | 1.04 (1.02-1.05) | 50,402 | 523,888 | 4.6x10 <sup>-8</sup>  | 1.05 (1.03-1.07) | 0.0006                |
| MTMR3/ASCC2 | rs6518681   | 22 | 30,609,554 | G | A | 91.4   | 8.64   | 50,789 | 526,119 | 1.7x10 <sup>-10</sup> | 1.09 (1.06-1.12) | 50,400 | 523,886 | 2.0x10 <sup>-10</sup> | 1.09 (1.06-1.12) | 0.9                   |
| YWHAH       | rs117001013 | 22 | 32,348,841 | C | T | 91.2   | 8.83   | 50,791 | 526,121 | 4.8x10 <sup>-8</sup>  | 1.08 (1.05-1.11) | 50,402 | 523,888 | 8.0x10 <sup>-9</sup>  | 1.08 (1.05-1.11) | 0.3                   |
| EP300       | rs5758223   | 22 | 41,489,920 | A | G | 71.7   | 28.3   | 50,790 | 526,120 | 9.3x10 <sup>-6</sup>  | 1.04 (1.02-1.05) | 50,401 | 523,887 | 0.00008               | 1.03 (1.02-1.05) | 0.4                   |
| PNPLA3      | rs738408    | 22 | 44,324,730 | T | C | 22.6   | 22.6   | 50,790 | 526,120 | 1.7x10 <sup>-9</sup>  | 1.05 (1.04-1.07) | 50,401 | 523,887 | 3.0x10 <sup>-12</sup> | 1.06 (1.05-1.08) | 0.01                  |
| PIM3        | rs1801645   | 22 | 50,356,850 | C | T | 27.5   | 27.5   | 50,790 | 526,120 | 1.2x10 <sup>-10</sup> | 1.06 (1.04-1.07) | 50,401 | 523,887 | 1.9x10 <sup>-10</sup> | 1.06 (1.04-1.08) | 0.9                   |
| PIM3        | rs112915006 | 22 | 50,604,696 | G | A | 5.12   | 5.12   | 50,791 | 526,121 | 3.9x10 <sup>-7</sup>  | 1.09 (1.06-1.13) | 50,402 | 523,888 | 4.6x10 <sup>-8</sup>  | 1.10 (1.07-1.14) | 0.2                   |

RAF: risk allele frequency; MAF: minor allele frequency; OR: Odds ratio; CI: confidence interval.

Supplementary Table 4 | Summary of sex-differentiated analysis.

| Nearest gene | Index variant | Chromosome | Position (Build 37 bp) | Risk allele | Other allele | Male-specific meta-analysis |          |                       |                  | Female-specific meta-analysis |          |                       |                  | Sex-differentiated meta-analysis |          |                       |                       |
|--------------|---------------|------------|------------------------|-------------|--------------|-----------------------------|----------|-----------------------|------------------|-------------------------------|----------|-----------------------|------------------|----------------------------------|----------|-----------------------|-----------------------|
|              |               |            |                        |             |              | Cases                       | Controls | p-value               | OR (95% CI)      | Cases                         | Controls | p-value               | OR (95% CI)      | Cases                            | Controls | p-value               | Heterogeneity p-value |
| SEC16B       | rs539515      | 1          | 177,889,025            | C           | A            | 41,842                      | 383,764  | 0.003                 | 1.03 (1.01-1.05) | 30,049                        | 434,330  | 1.7x10 <sup>-11</sup> | 1.08 (1.06-1.11) | 74,116                           | 823,996  | 1.9x10 <sup>-12</sup> | 0.002                 |
| SRGAP2       | rs9430095     | 1          | 206,593,900            | C           | G            | 41,842                      | 383,763  | 5.1x10 <sup>-8</sup>  | 1.05 (1.03-1.07) | 30,048                        | 434,330  | 0.06                  | 1.02 (1.00-1.04) | 74,116                           | 823,996  | 6.0x10 <sup>-8</sup>  | 0.03                  |
| ABCB10       | rs348330      | 1          | 229,672,955            | G           | A            | 41,841                      | 383,762  | 4.5x10 <sup>-14</sup> | 1.07 (1.05-1.09) | 30,048                        | 434,330  | 0.002                 | 1.03 (1.01-1.05) | 74,115                           | 823,996  | 3.3x10 <sup>-15</sup> | 0.01                  |
| THADA        | rs80147536    | 2          | 43,698,028             | A           | T            | 41,842                      | 383,762  | 9.6x10 <sup>-25</sup> | 1.16 (1.13-1.20) | 30,048                        | 434,329  | 2.1x10 <sup>-7</sup>  | 1.09 (1.06-1.13) | 74,116                           | 823,997  | 1.6x10 <sup>-29</sup> | 0.004                 |
| GLI2         | rs11688931    | 2          | 121,318,166            | C           | G            | 41,843                      | 383,764  | 0.0003                | 1.04 (1.02-1.07) | 30,049                        | 434,331  | 6.0x10 <sup>-9</sup>  | 1.08 (1.06-1.11) | 74,117                           | 823,997  | 5.9x10 <sup>-11</sup> | 0.05                  |
| GLI2         | rs11688682    | 2          | 121,347,612            | G           | C            | 41,843                      | 383,763  | 0.00001               | 1.04 (1.02-1.07) | 30,049                        | 434,330  | 5.2x10 <sup>-11</sup> | 1.08 (1.05-1.11) | 74,117                           | 823,996  | 3.5x10 <sup>-14</sup> | 0.03                  |
| CYTIP        | rs13426680    | 2          | 158,339,550            | A           | G            | 41,843                      | 383,763  | 0.001                 | 1.06 (1.02-1.10) | 30,049                        | 434,330  | 1.5x10 <sup>-9</sup>  | 1.13 (1.09-1.18) | 74,117                           | 823,996  | 5.6x10 <sup>-11</sup> | 0.01                  |
| GRB14/COBLL1 | rs10195252    | 2          | 165,513,091            | T           | C            | 41,843                      | 383,764  | 3.8x10 <sup>-8</sup>  | 1.05 (1.03-1.07) | 30,050                        | 434,331  | 4.4x10 <sup>-15</sup> | 1.08 (1.06-1.10) | 74,117                           | 823,997  | 1.1x10 <sup>-20</sup> | 0.02                  |
| TSC22D2      | rs62271373    | 3          | 150,066,540            | A           | T            | 41,843                      | 383,763  | 0.002                 | 1.06 (1.02-1.10) | 30,050                        | 434,331  | 4.5x10 <sup>-8</sup>  | 1.13 (1.08-1.18) | 74,117                           | 823,997  | 2.6x10 <sup>-9</sup>  | 0.04                  |
| RREB1        | rs9379084     | 6          | 7,231,843              | G           | A            | 41,843                      | 383,764  | 3.2x10 <sup>-8</sup>  | 1.08 (1.05-1.11) | 30,050                        | 434,331  | 6.2x10 <sup>-14</sup> | 1.13 (1.09-1.16) | 74,117                           | 823,997  | 1.3x10 <sup>-19</sup> | 0.04                  |
| VEGFA        | rs6458354     | 6          | 43,814,190             | C           | T            | 41,842                      | 383,763  | 2.5x10 <sup>-11</sup> | 1.06 (1.04-1.08) | 30,048                        | 434,329  | 0.002                 | 1.03 (1.01-1.06) | 74,116                           | 823,995  | 1.6x10 <sup>-12</sup> | 0.05                  |
| SLC25A51P1   | rs555402748   | 6          | 67,387,490             | T           | C            | 20,276                      | 211,157  | 0.02                  | 2.22 (1.14-4.32) | 9,791                         | 251,388  | 1.1x10 <sup>-7</sup>  | 8.97 (4.00-20.2) | 45,657                           | 492,696  | 4.8x10 <sup>-8</sup>  | 0.009                 |
| KLF14        | rs2268382     | 7          | 130,027,037            | C           | A            | 41,843                      | 383,764  | 0.1                   | 1.01 (1.00-1.03) | 30,050                        | 434,331  | 0.00002               | 1.04 (1.02-1.07) | 74,117                           | 823,997  | 0.00004               | 0.03                  |
| KLF14        | rs1562396     | 7          | 130,457,914            | G           | A            | 41,842                      | 383,763  | 0.0001                | 1.04 (1.02-1.06) | 30,049                        | 434,331  | 8.9x10 <sup>-16</sup> | 1.09 (1.07-1.11) | 74,116                           | 823,997  | 4.8x10 <sup>-18</sup> | 0.0005                |
| ANK1         | rs13262861    | 8          | 41,508,577             | C           | A            | 41,843                      | 383,764  | 2.3x10 <sup>-23</sup> | 1.12 (1.10-1.15) | 30,050                        | 434,330  | 4.8x10 <sup>-6</sup>  | 1.06 (1.04-1.09) | 74,117                           | 823,997  | 7.7x10 <sup>-27</sup> | 0.001                 |
| ANK1         | rs4736819     | 8          | 41,509,915             | T           | C            | 41,841                      | 383,763  | 1.4x10 <sup>-21</sup> | 1.09 (1.07-1.10) | 30,050                        | 434,330  | 0.0006                | 1.03 (1.01-1.05) | 74,115                           | 823,995  | 4.4x10 <sup>-23</sup> | 0.0002                |
| HAUS6        | rs7022807     | 9          | 19,067,833             | G           | A            | 41,842                      | 383,763  | 0.001                 | 1.03 (1.01-1.05) | 30,050                        | 434,330  | 1.7x10 <sup>-8</sup>  | 1.06 (1.04-1.08) | 74,116                           | 823,997  | 5.1x10 <sup>-10</sup> | 0.03                  |
| MTND2P8      | rs11137820    | 9          | 81,359,113             | C           | G            | 41,843                      | 383,763  | 2.6x10 <sup>-8</sup>  | 1.05 (1.03-1.07) | 30,048                        | 434,330  | 0.08                  | 1.02 (1.00-1.04) | 74,116                           | 823,996  | 3.9x10 <sup>-8</sup>  | 0.02                  |
| TLE1         | rs2796441     | 9          | 84,308,948             | G           | A            | 41,843                      | 383,764  | 1.1x10 <sup>-18</sup> | 1.08 (1.06-1.10) | 30,049                        | 434,331  | 7.2x10 <sup>-7</sup>  | 1.05 (1.03-1.07) | 74,116                           | 823,997  | 5.5x10 <sup>-23</sup> | 0.04                  |
| INS/IGF2     | rs11042596    | 11         | 2,118,860              | G           | T            | 41,841                      | 383,762  | 0.02                  | 1.02 (1.00-1.04) | 30,048                        | 434,329  | 6.8x10 <sup>-7</sup>  | 1.05 (1.03-1.08) | 74,115                           | 823,995  | 2.6x10 <sup>-7</sup>  | 0.03                  |
| KCNQ1        | rs2237895     | 11         | 2,857,194              | C           | A            | 41,843                      | 383,763  | 3.4x10 <sup>-35</sup> | 1.12 (1.10-1.13) | 30,049                        | 434,330  | 9.9x10 <sup>-13</sup> | 1.08 (1.05-1.10) | 74,116                           | 823,996  | 4.2x10 <sup>-45</sup> | 0.007                 |
| MAP3K11      | rs1783541     | 11         | 65,294,799             | T           | C            | 41,843                      | 383,764  | 0.0009                | 1.04 (1.01-1.06) | 30,050                        | 434,330  | 5.7x10 <sup>-14</sup> | 1.10 (1.07-1.12) | 74,116                           | 823,996  | 2.2x10 <sup>-15</sup> | 0.0006                |
| CDKN1B       | rs2066827     | 12         | 12,871,099             | G           | T            | 41,842                      | 383,763  | 2.3x10 <sup>-8</sup>  | 1.06 (1.04-1.08) | 30,050                        | 434,330  | 0.04                  | 1.03 (1.00-1.05) | 74,116                           | 823,996  | 2.2x10 <sup>-8</sup>  | 0.04                  |
| IRS2         | rs7987740     | 13         | 109,947,213            | T           | C            | 41,843                      | 383,764  | 0.004                 | 1.03 (1.01-1.04) | 30,048                        | 434,331  | 1.1x10 <sup>-7</sup>  | 1.05 (1.03-1.08) | 74,116                           | 823,996  | 1.0x10 <sup>-8</sup>  | 0.04                  |
| RASGRP1      | rs8032939     | 15         | 38,834,033             | C           | T            | 41,843                      | 383,764  | 0.01                  | 1.02 (1.00-1.04) | 30,049                        | 434,331  | 2.3x10 <sup>-9</sup>  | 1.07 (1.05-1.09) | 74,116                           | 823,997  | 8.3x10 <sup>-10</sup> | 0.004                 |
| TCF12        | rs117483894   | 15         | 57,456,802             | G           | A            | 41,843                      | 383,763  | 0.04                  | 1.05 (1.00-1.10) | 30,049                        | 434,329  | 7.0x10 <sup>-9</sup>  | 1.16 (1.10-1.22) | 74,115                           | 823,996  | 6.0x10 <sup>-9</sup>  | 0.003                 |
| CMIP         | rs2925979     | 16         | 81,534,790             | T           | C            | 41,843                      | 383,764  | 0.004                 | 1.03 (1.01-1.05) | 30,050                        | 434,331  | 2.6x10 <sup>-17</sup> | 1.09 (1.07-1.12) | 74,117                           | 823,997  | 4.0x10 <sup>-18</sup> | 8.3x10 <sup>-6</sup>  |
| PTPRS        | rs116953931   | 19         | 5,224,998              | A           | G            | 41,843                      | 383,764  | 0.05                  | 1.05 (1.00-1.10) | 30,050                        | 434,331  | 0.00001               | 1.12 (1.07-1.18) | 74,117                           | 823,997  | 7.8x10 <sup>-6</sup>  | 0.04                  |
| FARSA        | rs3111316     | 19         | 13,038,415             | A           | G            | 41,841                      | 383,763  | 0.002                 | 1.03 (1.01-1.04) | 30,048                        | 434,330  | 7.3x10 <sup>-13</sup> | 1.07 (1.05-1.10) | 74,115                           | 823,997  | 5.6x10 <sup>-14</sup> | 0.0007                |
| TM6SF2       | rs8107974     | 19         | 19,388,500             | T           | A            | 41,843                      | 383,763  | 3.9x10 <sup>-13</sup> | 1.12 (1.09-1.16) | 30,050                        | 434,331  | 0.002                 | 1.06 (1.02-1.10) | 74,116                           | 823,996  | 2.5x10 <sup>-14</sup> | 0.02                  |
| GIPR         | rs533172266   | 19         | 46,351,837             | T           | C            | 19,837                      | 207,502  | 0.03                  | 1.75 (1.05-2.91) | 16,833                        | 269,826  | 1.7x10 <sup>-6</sup>  | 3.81 (2.20-6.59) | 47,435                           | 495,952  | 1.1x10 <sup>-6</sup>  | 0.04                  |

RAF: risk allele frequency; MAF: minor allele frequency; OR: Odds ratio; CI: confidence interval.

Supplementary Table 5 | Summary of 99% credible sets for 380 distinct T2D association signals.

| Nearest gene | Index variant | Chromosome | Position (Build 37 bp) | Risk allele | Other allele | RAF (%) | MAF (%) | p-value               | 99% genetic credible set |               |                     |                    | 99% functional credible set |               |                     |                    |
|--------------|---------------|------------|------------------------|-------------|--------------|---------|---------|-----------------------|--------------------------|---------------|---------------------|--------------------|-----------------------------|---------------|---------------------|--------------------|
|              |               |            |                        |             |              |         |         |                       | SNPs                     | Interval (bp) | Interval start (bp) | Interval stop (bp) | SNPs                        | Interval (bp) | Interval start (bp) | Interval stop (bp) |
| MACF1        | rs3768321     | 1          | 40,035,928             | T           | G            | 20.0    | 20.0    | 2.6x10 <sup>-26</sup> | 72                       | 441,918       | 39,618,556          | 40,060,473         | 57                          | 39,736,334    | 40,038,571          | 302,238            |
| FAF1         | rs58432198    | 1          | 51,256,091             | C           | T            | 88.1    | 11.9    | 2.1x10 <sup>-10</sup> | 233                      | 588,366       | 50,920,161          | 51,508,526         | 221                         | 50,920,161    | 51,493,428          | 573,268            |
| PATJ         | rs12140153    | 1          | 62,579,891             | G           | T            | 90.5    | 9.49    | 1.3x10 <sup>-8</sup>  | 1                        | 1             | 62,579,891          | 62,579,891         | 1                           | 62,579,891    | 62,579,891          | 1                  |
| DENND2C      | rs184660829   | 1          | 115,144,899            | C           | T            | 0.0200  | 0.0200  | 2.5x10 <sup>-8</sup>  | N/A                      | N/A           | N/A                 | N/A                | N/A                         | N/A           | N/A                 | N/A                |
| PTGFRN       | rs1127215     | 1          | 117,532,790            | C           | T            | 58.4    | 41.6    | 1.6x10 <sup>-13</sup> | 3                        | 3,333         | 117,529,458         | 117,532,790        | 3                           | 117,529,458   | 117,532,790         | 3,333              |
| NOTCH2       | rs1493694     | 1          | 120,526,982            | T           | C            | 10.9    | 10.9    | 2.7x10 <sup>-16</sup> | 48                       | 116,417       | 120,437,718         | 120,554,134        | 50                          | 120,437,718   | 120,554,134         | 116,417            |
| FAM63A       | rs10305745    | 1          | 150,786,038            | A           | G            | 1.45    | 1.45    | 4.4x10 <sup>-6</sup>  | 723                      | 763,915       | 150,518,927         | 151,282,641        | 374                         | 150,521,099   | 151,282,841         | 761,743            |
| FAM63A       | rs145904381   | 1          | 151,017,991            | T           | C            | 98.7    | 1.33    | 2.6x10 <sup>-8</sup>  | 21                       | 823,456       | 150,651,482         | 151,474,937        | 36                          | 150,521,099   | 151,474,937         | 953,839            |
| SEC16B       | rs539515      | 1          | 177,889,025            | C           | A            | 19.8    | 19.8    | 1.6x10 <sup>-10</sup> | 44                       | 116,173       | 177,797,347         | 177,913,519        | 41                          | 177,793,822   | 177,913,519         | 119,698            |
| DSTYK        | rs12048743    | 1          | 205,114,873            | G           | C            | 44.2    | 44.2    | 3.5x10 <sup>-9</sup>  | 55                       | 222,669       | 205,039,295         | 205,261,963        | 50                          | 205,039,295   | 205,261,963         | 222,669            |
| SRGAP2       | rs9430095     | 1          | 206,593,900            | C           | G            | 49.4    | 49.4    | 1.9x10 <sup>-8</sup>  | 24                       | 130,362       | 206,512,359         | 206,642,720        | 26                          | 206,512,359   | 206,642,720         | 130,362            |
| PROX1        | rs79687284    | 1          | 214,150,821            | C           | G            | 3.48    | 3.48    | 2.6x10 <sup>-16</sup> | 2                        | 377           | 214,150,445         | 214,150,821        | 2                           | 214,150,445   | 214,150,821         | 377                |
| PROX1        | rs340874      | 1          | 214,159,256            | C           | T            | 55.6    | 44.5    | 1.6x10 <sup>-22</sup> | 1                        | 1             | 214,159,256         | 214,159,256        | 1                           | 214,159,256   | 214,159,256         | 1                  |
| PROX1        | rs114526150   | 1          | 214,175,531            | G           | T            | 2.25    | 2.25    | 4.2x10 <sup>-7</sup>  | 69                       | 293,959       | 213,946,973         | 214,240,931        | 67                          | 214,147,076   | 214,240,931         | 93,856             |
| LYPLAL1      | rs553014999   | 1          | 219,584,164            | C           | T            | 0.130   | 0.130   | 7.7x10 <sup>-6</sup>  | N/A                      | N/A           | N/A                 | N/A                | N/A                         | N/A           | N/A                 | N/A                |
| LYPLAL1      | rs2820446     | 1          | 219,748,818            | C           | G            | 70.6    | 29.5    | 3.3x10 <sup>-16</sup> | 14                       | 36,482        | 219,726,100         | 219,762,581        | 13                          | 219,730,006   | 219,762,581         | 32,576             |
| ABCB10       | rs348330      | 1          | 229,672,955            | G           | A            | 36.1    | 36.1    | 2.7x10 <sup>-14</sup> | 1                        | 1             | 229,672,955         | 229,672,955        | 1                           | 229,672,955   | 229,672,955         | 1                  |
| GNG4         | rs291367      | 1          | 235,690,800            | G           | A            | 63.2    | 36.8    | 4.7x10 <sup>-10</sup> | 65                       | 171,172       | 235,534,750         | 235,705,921        | 45                          | 235,534,750   | 235,705,921         | 171,172            |
| TMEM18       | rs62107261    | 2          | 422,144                | T           | C            | 95.4    | 4.64    | 3.8x10 <sup>-12</sup> | 3                        | 13,432        | 408,713             | 422,144            | 4                           | 408,713       | 466,003             | 57,291             |
| TMEM18       | rs35913461    | 2          | 653,575                | C           | T            | 82.9    | 17.1    | 1.6x10 <sup>-11</sup> | 175                      | 32,690        | 621,185             | 653,874            | 170                         | 601,905       | 653,874             | 51,970             |
| FAM49A       | rs11680058    | 2          | 16,574,669             | A           | G            | 86.3    | 13.7    | 1.4x10 <sup>-8</sup>  | 1                        | 1             | 16,574,669          | 16,574,669         | 1                           | 16,574,669    | 16,574,669          | 1                  |
| DTNB         | rs17802463    | 2          | 25,643,221             | G           | T            | 73.1    | 26.9    | 2.9x10 <sup>-8</sup>  | 44                       | 293,360       | 25,513,652          | 25,807,011         | 42                          | 25,513,652    | 25,807,011          | 293,360            |
| GCKR         | rs1260326     | 2          | 27,730,940             | C           | T            | 60.7    | 39.3    | 6.5x10 <sup>-25</sup> | 3                        | 11,664        | 27,730,940          | 27,742,603         | 4                           | 27,598,097    | 27,742,603          | 144,507            |
| THADA        | rs28525376    | 2          | 43,207,872             | G           | T            | 42.2    | 42.2    | 2.7x10 <sup>-6</sup>  | 768                      | 508,789       | 43,198,473          | 43,707,261         | 708                         | 43,198,473    | 43,705,862          | 507,390            |
| THADA        | rs6708643     | 2          | 43,430,440             | A           | G            | 50.1    | 49.9    | 3.9x10 <sup>-8</sup>  | 20                       | 25,273        | 43,421,344          | 43,446,616         | 19                          | 43,421,344    | 43,446,616          | 25,273             |
| THADA        | rs80147536    | 2          | 43,698,028             | A           | T            | 90.4    | 9.57    | 2.7x10 <sup>-29</sup> | 155                      | 236,769       | 43,528,057          | 43,764,825         | 144                         | 43,528,057    | 43,764,825          | 236,769            |
| BNIP1        | rs10193538    | 2          | 58,981,064             | T           | G            | 61.0    | 39.0    | 8.9x10 <sup>-9</sup>  | 76                       | 225,883       | 58,868,909          | 59,094,791         | 74                          | 58,868,909    | 59,094,120          | 225,282            |
| BNIP1        | rs6545714     | 2          | 59,307,725             | G           | A            | 39.2    | 39.2    | 8.9x10 <sup>-9</sup>  | 31                       | 372,883       | 59,291,172          | 59,664,054         | 30                          | 59,291,172    | 59,664,054          | 372,883            |
| BCL11A       | rs243024      | 2          | 60,583,665             | A           | G            | 46.0    | 46.0    | 2.5x10 <sup>-20</sup> | 8                        | 7,084         | 60,579,624          | 60,586,707         | 8                           | 60,579,624    | 60,586,707          | 7,084              |
| CEP68        | rs2249105     | 2          | 65,287,896             | A           | G            | 63.4    | 36.6    | 2.2x10 <sup>-14</sup> | 3                        | 8,385         | 65,287,896          | 65,296,280         | 3                           | 65,287,896    | 65,296,280          | 8,385              |
| CEP68        | rs2052261     | 2          | 65,355,270             | G           | A            | 30.4    | 30.4    | 2.5x10 <sup>-6</sup>  | 1,551                    | 929,304       | 64,855,857          | 65,785,160         | 263                         | 64,860,118    | 65,756,072          | 895,955            |
| CEP68        | rs2028150     | 2          | 65,655,012             | C           | G            | 59.8    | 40.2    | 2.3x10 <sup>-12</sup> | 24                       | 42,056        | 65,642,097          | 65,684,152         | 22                          | 65,642,097    | 65,684,152          | 42,056             |
| TMEM127      | rs79046683    | 2          | 96,913,918             | T           | G            | 0.480   | 0.480   | 3.0x10 <sup>-8</sup>  | N/A                      | N/A           | N/A                 | N/A                | N/A                         | N/A           | N/A                 | N/A                |
| DDX18        | rs562386202   | 2          | 118,071,061            | G           | A            | 0.0600  | 0.0600  | 4.2x10 <sup>-8</sup>  | N/A                      | N/A           | N/A                 | N/A                | N/A                         | N/A           | N/A                 | N/A                |
| GLI2         | rs11688931    | 2          | 121,318,166            | C           | G            | 84.9    | 15.1    | 8.2x10 <sup>-6</sup>  | 2,400                    | 970,450       | 120,847,642         | 121,818,091        | 1,903                       | 120,847,642   | 121,818,091         | 970,450            |
| GLI2         | rs11688682    | 2          | 121,347,612            | G           | C            | 72.8    | 27.2    | 4.2x10 <sup>-9</sup>  | 4                        | 2,981         | 121,347,612         | 121,350,592        | 3                           | 121,347,612   | 121,349,906         | 2,295              |
| GLI2         | rs66477705    | 2          | 121,378,852            | T           | C            | 96.7    | 3.30    | 2.6x10 <sup>-6</sup>  | 351                      | 947,985       | 120,882,782         | 121,830,766        | 238                         | 120,980,712   | 121,832,984         | 852,273            |
| PABPC1P2     | rs35999103    | 2          | 147,861,633            | T           | C            | 15.5    | 15.5    | 9.7x10 <sup>-9</sup>  | 53                       | 146,388       | 147,807,932         | 147,954,319        | 54                          | 147,807,932   | 147,954,319         | 146,388            |
| CYTI1        | rs13426680    | 2          | 158,339,550            | A           | G            | 93.7    | 6.27    | 6.7x10 <sup>-10</sup> | 26                       | 100,208       | 158,309,480         | 158,409,687        | 27                          | 158,309,480   | 158,409,687         | 100,208            |
| RBM5         | rs3772071     | 2          | 161,135,544            | T           | C            | 71.4    | 28.7    | 1.2x10 <sup>-11</sup> | 30                       | 246,462       | 161,087,411         | 161,333,872        | 24                          | 161,087,411   | 161,265,099         | 177,689            |
| GRB14/COBLL1 | rs10195252    | 2          | 165,513,091            | T           | C            | 58.6    | 41.4    | 6.0x10 <sup>-25</sup> | 5                        | 31,273        | 165,508,389         | 165,539,661        | 5                           | 165,508,389   | 165,539,661         | 31,273             |
| GRB14/COBLL1 | rs13024606    | 2          | 165,573,194            | T           | C            | 4.72    | 4.72    | 1.7x10 <sup>-8</sup>  | 41                       | 818,947       | 165,144,110         | 165,963,056        | 35                          | 165,470,735   | 165,702,813         | 232,079            |
| CRYBA2       | rs113414093   | 2          | 219,859,171            | A           | G            | 5.14    | 5.14    | 6.6x10 <sup>-9</sup>  | 793                      | 995,525       | 219,361,518         | 220,357,042        | 170                         | 219,390,845   | 220,349,385         | 958,541            |
| IRS1         | rs2972144     | 2          | 227,101,411            | G           | A            | 63.9    | 36.2    | 2.1x10 <sup>-46</sup> | 30                       | 34,288        | 227,083,411         | 227,117,698        | 32                          | 227,083,411   | 227,122,216         | 38,806             |
| PPARG        | rs11709077    | 3          | 12,336,507             | G           | A            | 87.7    | 12.4    | 1.8x10 <sup>-36</sup> | 11                       | 67,131        | 12,329,783          | 12,396,913         | 8                           | 12,329,783    | 12,393,125          | 63,343             |
| PPARG        | rs17819328    | 3          | 12,489,342             | G           | T            | 42.5    | 42.5    | 4.8x10 <sup>-16</sup> | 8                        | 10,383        | 12,488,882          | 12,499,264         | 8                           | 12,488,882    | 12,499,264          | 10,383             |
| UBE2E2       | rs35352848    | 3          | 23,455,582             | T           | C            | 78.8    | 21.2    | 1.3x10 <sup>-17</sup> | 5                        | 2,291         | 23,454,790          | 23,457,080         | 5                           | 23,454,790    | 23,457,080          | 2,291              |
| UBE2E2       | rs17013314    | 3          | 23,510,044             | G           | A            | 3.13    | 3.13    | 8.4x10 <sup>-9</sup>  | 209                      | 385,895       | 23,252,089          | 23,637,983         | 208                         | 23,252,089    | 23,637,983          | 385,895            |
| KIF9         | rs11926707    | 3          | 46,925,539             | C           | T            | 62.6    | 37.4    | 2.1x10 <sup>-9</sup>  | 838                      | 999,083       | 46,426,391          | 47,425,473         | 248                         | 46,447,326    | 47,425,473          | 978,148            |
| KIF9         | rs75423501    | 3          | 47,242,923             | G           | A            | 10.1    | 10.1    | 7.5x10 <sup>-6</sup>  | 1,083                    | 681,388       | 46,743,934          | 47,425,321         | 954                         | 46,743,934    | 47,425,473          | 681,540            |
| RBM6         | rs4688760     | 3          | 49,980,596             | T           | C            | 68.4    | 31.6    | 3.5x10 <sup>-10</sup> | 155                      | 438,284       | 49,736,565          | 50,174,848         | 164                         | 49,735,746    | 50,174,848          | 439,103            |
| RFT1         | rs2581787     | 3          | 53,127,677             | T           | G            | 56.3    | 43.7    | 2.4x10 <sup>-8</sup>  | 43                       | 151,248       | 52,989,383          | 53,140,630         | 35                          | 53,103,796    | 53,139,977          | 36,182             |
| CACNA2D3     | rs76263492    | 3          | 54,828,827             | T           | G            | 4.52    | 4.52    | 6.3x10 <sup>-9</sup>  | 4                        | 52,976        | 54,823,598          | 54,876,573         | 5                           | 54,823,598    | 54,876,573          | 52,976             |
| PSMD6        | rs3774723     | 3          | 63,962,339             | G           | A            | 84.4    | 15.6    | 1.6x10 <sup>-13</sup> | 20                       | 151,397       | 63,853,423          | 64,004,819         | 18                          | 63,853,423    | 64,004,819          | 151,397            |
| PSMD6        | rs74368513    | 3          | 64,460,694             | G           | A            | 99.6    | 0.44    | 7.0x10 <sup>-6</sup>  | 1,227                    | 501,222       | 63,961,083          | 64,462,304         | 1,293                       | 63,961,083    | 64,461,524          | 500,442            |
| ADAMTS9      | rs9860730     | 3          | 64,701,146             | A           | G            | 70.4    | 29.6    | 4.9x10 <sup>-15</sup> | 23                       | 29,697        | 64,700,425          | 64,730,121         | 22                          | 64,700,425    | 64,730,121          | 29,697             |
| SHQ1         | rs13085136    | 3          | 72,865,183             | C           | T            | 92.8    | 7.17    | 1.5x10 <sup>-8</sup>  | 4                        | 138,604       | 72,773,255          | 72,911,858         | 46                          | 72,773,255    | 72,957,251          | 183,997            |
| ROBO2        | rs2272163     | 3          | 77,671,721             | C           | A            | 61.8    | 38.2    | 9.6x10 <sup>-9</sup>  | 76                       | 456,992       | 77,289,173          | 77,746,164         | 84                          | 77,456,444    | 77,746,164          | 289,721            |
| ADCY5        | rs111708067   | 3          | 123,065,778            | A           | G            | 77.2    | 22.8    | 5.2x10 <sup>-32</sup> | 4                        | 4,649         | 123,065,778         | 123,070,426        | 3                           | 123,065,778   | 123,069,058         | 3,281              |
| SLC12A8      | rs649961      | 3          | 124,926,637            | T           | C            | 46.5    | 46.5    | 9.9x10 <sup>-10</sup> | 19                       | 10,942        | 124,917,683         | 124,928,624        | 12                          | 124,919,777   | 124,926,976         | 7,200              |
| TMCC1        | rs9828772     | 3          | 129,333,182            | C           | G            | 89.8    | 10.2    | 4.2x10 <sup>-8</sup>  | 103                      | 700,383       | 128,982,910         | 129,683,292        | 75                          | 129,023,491   | 129,471,855         | 448,365            |
| TMCC1        | rs559138871   | 3          | 129,470,067            | T           | C            | 0.200   | 0.200   | 7.3x10 <sup>-6</sup>  | N/A                      | N/A           | N/A                 | N/A                | N/A                         | N/A           | N/A                 | N/A                |

|          |             |   |             |   |   |       |       |                       |       |         |             |             |       |             |             |         |
|----------|-------------|---|-------------|---|---|-------|-------|-----------------------|-------|---------|-------------|-------------|-------|-------------|-------------|---------|
| TSC22D2  | rs62271373  | 3 | 150,066,540 | A | T | 5.53  | 5.53  | 1.0x10 <sup>-9</sup>  | 5     | 35,329  | 150,047,893 | 150,083,221 | 9     | 150,018,637 | 150,090,266 | 71,630  |
| MBNL1    | rs13065698  | 3 | 152,086,533 | A | G | 60.0  | 40.0  | 8.1x10 <sup>-13</sup> | 27    | 172,252 | 151,993,809 | 152,166,060 | 22    | 151,993,809 | 152,166,060 | 172,252 |
| MBNL1    | rs74653713  | 3 | 152,417,881 | C | A | 95.7  | 42.9  | 1.2x10 <sup>-8</sup>  | 100   | 165,759 | 152,369,607 | 152,535,365 | 98    | 152,369,607 | 152,535,365 | 165,759 |
| MBNL1    | rs35497231  | 3 | 152,433,628 | C | T | 31.7  | 31.7  | 7.6x10 <sup>-8</sup>  | 149   | 186,566 | 152,320,458 | 152,507,023 | 141   | 152,320,458 | 152,507,023 | 186,566 |
| EGFEM1P  | rs7629630   | 3 | 168,218,841 | A | T | 85.7  | 14.3  | 2.5x10 <sup>-8</sup>  | 29    | 56,542  | 168,212,861 | 168,269,402 | 22    | 168,212,861 | 168,268,634 | 55,774  |
| SLC2A2   | rs9873618   | 3 | 170,733,076 | G | A | 71.0  | 29.0  | 4.8x10 <sup>-21</sup> | 14    | 105,168 | 170,627,909 | 170,733,076 | 11    | 170,665,296 | 170,733,076 | 67,781  |
| ABCC5    | rs2872246   | 3 | 183,738,460 | A | C | 45.4  | 45.4  | 1.5x10 <sup>-8</sup>  | 100   | 347,159 | 183,411,802 | 183,758,960 | 86    | 183,563,571 | 183,946,205 | 382,635 |
| IGF2BP2  | rs6780171   | 3 | 185,503,456 | A | T | 31.4  | 31.4  | 9.0x10 <sup>-26</sup> | 41    | 39,163  | 185,495,320 | 185,534,482 | 40    | 185,495,320 | 185,534,482 | 39,163  |
| IGF2BP2  | rs150111048 | 3 | 185,514,421 | G | A | 23.9  | 23.9  | 2.7x10 <sup>-7</sup>  | 243   | 963,206 | 185,028,894 | 185,992,099 | 2     | 185,514,421 | 185,653,097 | 138,677 |
| IGF2BP2  | rs11717959  | 3 | 185,541,213 | G | T | 62.1  | 37.9  | 3.0x10 <sup>-6</sup>  | 1,528 | 960,667 | 185,042,049 | 186,002,715 | 317   | 185,042,049 | 185,996,480 | 954,432 |
| IGF2BP2  | rs1516728   | 3 | 185,829,891 | A | T | 75.9  | 24.1  | 6.3x10 <sup>-6</sup>  | 979   | 672,325 | 185,330,391 | 186,002,715 | 162   | 185,336,716 | 185,996,480 | 659,765 |
| ST6GAL1  | rs3887925   | 3 | 186,665,645 | T | C | 54.7  | 45.3  | 3.1x10 <sup>-22</sup> | 2     | 8,494   | 186,665,645 | 186,674,138 | 1     | 186,665,645 | 186,665,645 | 1       |
| ST6GAL1  | rs7645517   | 3 | 186,675,277 | A | G | 5.76  | 5.76  | 2.5x10 <sup>-8</sup>  | 9     | 8,743   | 186,667,713 | 186,676,455 | 9     | 186,657,420 | 186,675,277 | 17,858  |
| LPP      | rs4686471   | 3 | 187,740,899 | C | T | 61.0  | 39.0  | 1.7x10 <sup>-20</sup> | 3     | 1,320   | 187,740,523 | 187,741,842 | 3     | 187,740,523 | 187,741,842 | 1,320   |
| PCGF3    | rs111827885 | 4 | 616,608     | C | T | 1.56  | 1.56  | 8.4x10 <sup>-6</sup>  | 3,104 | 870,284 | 245,447     | 1,115,730   | 2,420 | 245,447     | 1,115,730   | 870,284 |
| PCGF3    | rs21021583  | 4 | 744,972     | T | G | 4.58  | 4.58  | 3.5x10 <sup>-14</sup> | 26    | 42,130  | 702,843     | 744,972     | 23    | 702,843     | 744,972     | 42,130  |
| PCGF3    | rs35654957  | 4 | 1,010,077   | C | T | 36.7  | 36.7  | 4.2x10 <sup>-7</sup>  | 426   | 731,751 | 512,932     | 1,244,682   | 145   | 593,216     | 1,244,682   | 651,467 |
| MAEA     | rs56337234  | 4 | 1,784,403   | C | T | 50.3  | 49.7  | 8.6x10 <sup>-18</sup> | 5     | 2,920   | 1,781,686   | 1,784,605   | 5     | 1,781,686   | 1,784,605   | 2,920   |
| HTT      | rs362307    | 4 | 3,241,845   | T | C | 7.68  | 7.68  | 1.1x10 <sup>-9</sup>  | 13    | 70,762  | 3,241,845   | 3,312,606   | 2     | 3,241,845   | 3,243,804   | 1,960   |
| WFS1     | rs1801212   | 4 | 6,302,519   | A | G | 70.9  | 29.1  | 4.5x10 <sup>-6</sup>  | 3,997 | 995,219 | 5,806,789   | 6,802,007   | 2,013 | 5,809,127   | 6,800,880   | 991,554 |
| WFS1     | rs10937721  | 4 | 6,306,763   | C | G | 58.8  | 41.2  | 1.5x10 <sup>-8</sup>  | 108   | 41,845  | 6,280,449   | 6,322,293   | 108   | 6,271,043   | 6,322,293   | 51,251  |
| LCORL    | rs12640250  | 4 | 17,792,869  | C | A | 71.5  | 28.5  | 3.7x10 <sup>-8</sup>  | 74    | 422,736 | 17,792,869  | 18,215,604  | 38    | 17,792,869  | 18,046,499  | 253,631 |
| GNPDA2   | rs10938398  | 4 | 45,186,139  | A | G | 42.9  | 42.9  | 3.6x10 <sup>-12</sup> | 5     | 10,449  | 45,175,691  | 45,186,139  | 5     | 45,175,691  | 45,186,139  | 10,449  |
| USP46    | rs2102278   | 4 | 52,818,664  | G | A | 31.9  | 31.9  | 3.7x10 <sup>-8</sup>  | 254   | 621,369 | 52,661,630  | 53,282,998  | 177   | 52,661,630  | 52,942,986  | 281,357 |
| USP46    | rs114447556 | 4 | 53,207,093  | T | C | 8.39  | 8.39  | 8.4x10 <sup>-6</sup>  | 1,695 | 610,184 | 52,708,220  | 53,318,403  | 1,405 | 52,708,220  | 53,318,403  | 610,184 |
| SCD5     | rs12642790  | 4 | 83,578,271  | A | G | 33.8  | 33.8  | 4.4x10 <sup>-10</sup> | 32    | 27,770  | 83,561,503  | 83,589,272  | 7     | 83,578,271  | 83,587,562  | 9,292   |
| FAM13A   | rs1903002   | 4 | 89,740,894  | G | C | 50.1  | 50.0  | 2.7x10 <sup>-8</sup>  | 52    | 64,455  | 89,704,367  | 89,768,821  | 47    | 89,706,643  | 89,768,821  | 62,179  |
| FAM13A   | rs576406049 | 4 | 89,857,291  | T | C | 0.130 | 0.130 | 1.6x10 <sup>-6</sup>  | N/A   | N/A     | N/A         | N/A         | N/A   | N/A         | N/A         | N/A     |
| SMARCAD1 | rs6821438   | 4 | 95,091,911  | A | G | 53.4  | 46.6  | 4.0x10 <sup>-11</sup> | 138   | 312,989 | 95,000,394  | 95,313,382  | 152   | 95,012,459  | 95,318,346  | 305,888 |
| SLC9B1   | rs1580278   | 4 | 104,140,848 | C | A | 47.3  | 47.3  | 2.2x10 <sup>-10</sup> | 373   | 549,326 | 103,675,108 | 104,224,433 | 350   | 103,675,108 | 104,140,848 | 465,741 |
| PABPC4L  | rs1296328   | 4 | 137,083,193 | A | C | 44.6  | 44.6  | 3.5x10 <sup>-8</sup>  | 57    | 132,082 | 136,966,779 | 137,098,860 | 63    | 136,966,779 | 137,098,860 | 132,082 |
| TMEM154  | rs7669833   | 4 | 153,513,369 | T | A | 70.5  | 29.6  | 1.2x10 <sup>-14</sup> | 36    | 24,961  | 153,495,515 | 153,520,475 | 28    | 153,495,515 | 153,520,475 | 24,961  |
| PDGFC    | rs28819812  | 4 | 157,652,753 | C | A | 67.7  | 32.3  | 2.2x10 <sup>-8</sup>  | 120   | 131,233 | 157,614,725 | 157,745,957 | 122   | 157,614,725 | 157,757,755 | 143,031 |
| ACSL1    | rs58730668  | 4 | 185,717,759 | T | C | 85.8  | 14.2  | 1.3x10 <sup>-13</sup> | 46    | 17,143  | 185,713,608 | 185,730,750 | 44    | 185,713,608 | 185,730,750 | 17,143  |
| ANKH     | rs3845281   | 5 | 14,610,134  | G | A | 90.4  | 9.61  | 2.3x10 <sup>-11</sup> | 41    | 137,017 | 14,591,039  | 14,728,055  | 40    | 14,591,039  | 14,728,055  | 137,017 |
| ANKH     | rs78408340  | 5 | 14,751,305  | C | T | 99.4  | 0.62  | 7.8x10 <sup>-13</sup> | 2     | 4,615   | 14,751,305  | 14,755,919  | 2     | 14,751,305  | 14,755,919  | 4,615   |
| ANKH     | rs17250977  | 5 | 14,753,745  | G | A | 3.76  | 3.76  | 2.0x10 <sup>-11</sup> | 2     | 14,781  | 14,738,965  | 14,753,745  | 2     | 14,738,965  | 14,753,745  | 14,781  |
| ANKH     | rs6885132   | 5 | 14,768,092  | C | G | 90.4  | 9.60  | 1.7x10 <sup>-8</sup>  | 74    | 285,404 | 14,568,231  | 14,853,634  | 41    | 14,763,925  | 14,835,599  | 71,675  |
| ANKH     | rs76549217  | 5 | 14,768,766  | T | C | 2.95  | 2.95  | 3.0x10 <sup>-10</sup> | 1     | 1       | 14,768,766  | 14,768,766  | 1     | 14,768,766  | 14,768,766  | 1       |
| MRPS30   | rs62360490  | 5 | 44,534,364  | T | C | 3.13  | 3.13  | 3.4x10 <sup>-6</sup>  | 763   | 588,240 | 44,446,074  | 45,034,313  | 237   | 44,446,133  | 45,030,781  | 584,649 |
| MRPS30   | rs6884702   | 5 | 44,682,589  | G | A | 39.3  | 39.3  | 1.5x10 <sup>-10</sup> | 247   | 302,421 | 44,642,670  | 44,945,090  | 227   | 44,642,670  | 44,945,090  | 302,421 |
| ITGA1    | rs17261179  | 5 | 51,791,225  | T | C | 51.7  | 48.3  | 1.3x10 <sup>-8</sup>  | 25    | 74,215  | 51,720,684  | 51,794,898  | 26    | 51,720,684  | 51,794,898  | 74,215  |
| ITGA1    | rs3811978   | 5 | 52,100,489  | G | A | 16.7  | 16.7  | 7.7x10 <sup>-11</sup> | 26    | 46,295  | 52,072,194  | 52,118,488  | 24    | 52,072,194  | 52,118,488  | 46,295  |
| ITGA1    | rs62357230  | 5 | 52,315,682  | A | G | 3.39  | 3.39  | 5.9x10 <sup>-6</sup>  | 1,480 | 998,483 | 51,816,708  | 52,815,190  | 1,086 | 51,816,708  | 52,811,204  | 994,497 |
| ARL15    | rs62370480  | 5 | 52,774,510  | A | G | 22.0  | 22.0  | 2.0x10 <sup>-6</sup>  | 1,652 | 999,128 | 52,275,165  | 53,274,292  | 150   | 52,297,932  | 53,268,072  | 970,141 |
| ARL15    | rs7026234   | 5 | 53,271,420  | A | G | 69.0  | 31.0  | 7.7x10 <sup>-14</sup> | 3     | 4,882   | 53,271,420  | 53,276,301  | 3     | 53,271,420  | 53,276,301  | 4,882   |
| ARL15    | rs279744    | 5 | 53,412,620  | C | A | 69.1  | 30.9  | 3.1x10 <sup>-9</sup>  | 97    | 192,436 | 53,290,571  | 53,483,006  | 97    | 53,290,571  | 53,483,006  | 192,436 |
| ANKRD55  | rs465002    | 5 | 55,808,475  | T | C | 74.2  | 25.8  | 6.1x10 <sup>-38</sup> | 13    | 11,122  | 55,799,184  | 55,810,305  | 12    | 55,799,184  | 55,810,305  | 11,122  |
| ANKRD55  | rs2431115   | 5 | 55,848,669  | A | G | 40.2  | 40.2  | 3.9x10 <sup>-10</sup> | 16    | 19,035  | 55,834,402  | 55,853,436  | 16    | 55,834,402  | 55,853,436  | 19,035  |
| ANKRD55  | rs9687832   | 5 | 55,861,595  | A | G | 19.8  | 19.8  | 1.7x10 <sup>-20</sup> | 8     | 5,520   | 55,856,375  | 55,861,894  | 8     | 55,856,375  | 55,861,894  | 5,520   |
| ANKRD55  | rs96844     | 5 | 56,196,604  | G | A | 26.2  | 26.2  | 5.4x10 <sup>-8</sup>  | 62    | 286,150 | 55,989,823  | 56,275,972  | 17    | 56,106,474  | 56,261,335  | 154,862 |
| PIK3R1   | rs4976033   | 5 | 67,714,246  | G | A | 41.1  | 41.1  | 1.0x10 <sup>-9</sup>  | 115   | 884,675 | 67,328,752  | 68,213,426  | 44    | 67,511,340  | 67,824,690  | 313,351 |
| POC5     | rs2307111   | 5 | 75,003,678  | T | C | 60.5  | 39.5  | 2.1x10 <sup>-16</sup> | 12    | 81,234  | 74,934,009  | 75,015,242  | 9     | 74,965,122  | 75,010,002  | 44,881  |
| ZBED3    | rs4457053   | 5 | 76,424,949  | G | A | 30.4  | 30.4  | 8.4x10 <sup>-18</sup> | 5     | 10,056  | 76,424,949  | 76,435,004  | 5     | 76,424,949  | 76,435,004  | 10,056  |
| DMGDH    | rs1316776   | 5 | 78,430,607  | C | A | 64.8  | 35.2  | 2.6x10 <sup>-12</sup> | 65    | 153,804 | 78,416,416  | 78,570,219  | 65    | 78,416,416  | 78,602,863  | 186,448 |
| RASA1    | rs7719891   | 5 | 86,577,352  | G | A | 25.9  | 25.9  | 2.4x10 <sup>-8</sup>  | 41    | 563,995 | 86,500,273  | 87,064,267  | 29    | 86,500,273  | 87,059,812  | 559,540 |
| SLCO6A1  | rs138337556 | 5 | 101,232,944 | G | A | 0.360 | 0.360 | 4.7x10 <sup>-9</sup>  | 3     | 52,249  | 101,662,386 | 101,714,634 | 3     | 101,662,386 | 101,714,634 | 52,249  |
| PAM      | rs78408340  | 5 | 102,338,739 | G | C | 0.830 | 0.830 | 2.1x10 <sup>-24</sup> | 1     | 1       | 102,338,739 | 102,338,739 | 1     | 102,338,739 | 102,338,739 | 1       |
| PAM      | rs115505614 | 5 | 102,422,968 | T | C | 4.99  | 4.99  | 1.3x10 <sup>-30</sup> | 8     | 285,050 | 102,301,358 | 102,586,407 | 8     | 102,301,358 | 102,537,285 | 235,928 |
| PHF15    | rs244665    | 5 | 133,414,622 | A | G | 70.3  | 29.7  | 9.9x10 <sup>-6</sup>  | 1,296 | 549,829 | 133,364,646 | 133,914,474 | 1,124 | 133,364,646 | 133,914,474 | 549,829 |
| PHF15    | rs329122    | 5 | 133,864,599 | A | G | 42.9  | 42.9  | 3.6x10 <sup>-9</sup>  | 9     | 26,765  | 133,861,663 | 133,888,427 | 5     | 133,861,663 | 133,888,427 | 26,765  |
| EBF1     | rs3934712   | 5 | 157,928,196 | C | T | 20.6  | 20.6  | 3.2x10 <sup>-8</sup>  | 152   | 146,108 | 157,884,706 | 158,030,813 | 149   | 157,884,706 | 158,030,813 | 146,108 |
| RREB1    | rs112498319 | 6 | 7,035,734   | C | A | 40.9  | 40.9  | 4.2x10 <sup>-7</sup>  | 798   | 800,040 | 6,732,330   | 7,532,369   | 202   | 6,809,878   | 7,395,350   | 585,473 |
| RREB1    | rs9379084   | 6 | 7,231,843   | G | A | 88.7  | 11.3  | 3.3x10 <sup>-21</sup> | 1     | 1       | 7,231,843   | 7,231,843   | 1     | 7,231,843   | 7,231,843   | 1       |
| RREB1    | rs9505097   | 6 | 7,255,650   | C | T | 79.9  | 20.1  | 8.6x10 <sup>-10</sup> | 22    | 63,287  | 7,195,684   | 7,258,970   | 21    | 7,195,684   | 7,258,97    |         |

|            |             |   |             |   |   |        |        |                        |       |         |             |             |       |             |             |         |
|------------|-------------|---|-------------|---|---|--------|--------|------------------------|-------|---------|-------------|-------------|-------|-------------|-------------|---------|
| VEGFA      | rs6458354   | 6 | 43,814,190  | C | T | 28.9   | 28.9   | 2.1x10 <sup>-12</sup>  | 21    | 25,134  | 43,804,808  | 43,829,941  | 20    | 43,805,502  | 43,829,941  | 24,440  |
| TFAP2B     | rs3798519   | 6 | 50,788,778  | C | A | 18.4   | 18.4   | 2.6x10 <sup>-12</sup>  | 37    | 155,798 | 50,784,880  | 50,940,677  | 27    | 50,784,880  | 50,937,412  | 152,533 |
| TFAP2B     | rs2465043   | 6 | 51,180,765  | G | A | 64.4   | 35.6   | 2.9x10 <sup>-6</sup>   | 1,171 | 607,518 | 50,681,022  | 51,288,539  | 974   | 50,681,022  | 51,288,539  | 607,518 |
| SLC25A51P1 | rs555402748 | 6 | 67,387,490  | T | C | 0.0400 | 0.0400 | 4.6x10 <sup>-8</sup>   | N/A   | N/A     | N/A         | N/A         | N/A   | N/A         | N/A         | N/A     |
| BEND3      | rs4946812   | 6 | 107,431,688 | G | A | 67.4   | 32.6   | 8.2x10 <sup>-9</sup>   | 17    | 23,028  | 107,422,239 | 107,445,266 | 17    | 107,422,239 | 107,445,266 | 23,028  |
| CENPW      | rs11759026  | 6 | 126,792,095 | G | A | 23.2   | 23.2   | 2.4x10 <sup>-18</sup>  | 2     | 172,416 | 126,792,095 | 126,964,510 | 2     | 126,792,095 | 126,964,510 | 172,416 |
| SOGA3      | rs2800733   | 6 | 127,416,930 | A | G | 71.7   | 28.4   | 6.0x10 <sup>-11</sup>  | 31    | 29,188  | 127,399,045 | 127,428,232 | 31    | 127,399,045 | 127,437,399 | 38,355  |
| SLC35D3    | rs9494624   | 6 | 137,300,960 | A | G | 29.0   | 29.0   | 6.1x10 <sup>-9</sup>   | 34    | 17,765  | 137,287,702 | 137,305,466 | 33    | 137,287,702 | 137,302,880 | 15,179  |
| MIR3668    | rs2982521   | 6 | 139,835,329 | A | T | 38.0   | 38.0   | 1.3x10 <sup>-9</sup>   | 14    | 7,569   | 139,829,560 | 139,837,128 | 14    | 139,829,560 | 139,837,128 | 7,569   |
| MIR3668    | rs616279    | 6 | 140,249,466 | A | G | 73.8   | 26.2   | 6.7x10 <sup>-7</sup>   | 106   | 585,706 | 139,749,571 | 140,335,276 | 109   | 139,750,827 | 140,335,276 | 584,450 |
| SLC22A3    | rs474513    | 6 | 160,770,312 | A | G | 51.7   | 48.3   | 8.1x10 <sup>-10</sup>  | 28    | 83,862  | 160,767,905 | 160,851,766 | 24    | 160,769,423 | 160,776,325 | 6,903   |
| QKI        | rs4709746   | 6 | 164,133,001 | C | T | 86.8   | 13.2   | 5.8x10 <sup>-9</sup>   | 7     | 29,759  | 164,103,243 | 164,133,001 | 7     | 164,103,243 | 164,133,001 | 29,759  |
| DGKB       | rs17168486  | 7 | 14,898,282  | T | C | 18.1   | 18.1   | 2.3x10 <sup>-17</sup>  | 6     | 62,871  | 14,859,137  | 14,922,007  | 5     | 14,859,137  | 14,922,007  | 62,871  |
| DGKB       | rs10228066  | 7 | 15,063,569  | T | C | 53.7   | 46.3   | 1.1x10 <sup>-28</sup>  | 17    | 2,774   | 15,062,694  | 15,065,467  | 14    | 15,062,694  | 15,065,074  | 2,381   |
| DGKB       | rs2908334   | 7 | 15,206,239  | T | C | 63.1   | 36.9   | 5.9x10 <sup>-6</sup>   | 2,548 | 855,887 | 14,706,444  | 15,562,330  | 1,829 | 14,706,444  | 15,562,302  | 855,859 |
| IGF2BP3    | rs78840640  | 7 | 23,434,606  | G | C | 2.20   | 2.20   | 6.8x10 <sup>-6</sup>   | 1,958 | 921,440 | 23,013,118  | 23,934,557  | 184   | 23,021,797  | 23,925,750  | 903,954 |
| IGF2BP3    | rs4279506   | 7 | 23,512,896  | G | C | 61.0   | 39.0   | 4.8x10 <sup>-8</sup>   | 388   | 989,817 | 23,013,118  | 24,002,934  | 146   | 23,052,426  | 24,002,934  | 950,509 |
| JAZF1      | rs1708302   | 7 | 28,198,677  | C | T | 51.2   | 48.8   | 1.1x10 <sup>-48</sup>  | 6     | 7,818   | 28,192,280  | 28,200,097  | 6     | 28,192,280  | 28,200,097  | 7,818   |
| CRHR2      | rs917195    | 7 | 30,728,452  | C | T | 77.0   | 23.0   | 4.2x10 <sup>-11</sup>  | 4     | 638     | 30,727,920  | 30,728,557  | 2     | 30,728,452  | 30,728,557  | 106     |
| GCK        | rs878521    | 7 | 44,255,643  | A | G | 24.5   | 24.5   | 1.9x10 <sup>-13</sup>  | 2     | 23,866  | 44,231,778  | 44,255,643  | 1     | 44,255,643  | 44,255,643  | 1       |
| GCK        | rs116913033 | 7 | 44,365,549  | C | T | 83.0   | 17.0   | 7.1x10 <sup>-6</sup>   | 1,573 | 889,226 | 43,866,240  | 44,755,465  | 439   | 43,878,911  | 44,747,499  | 868,589 |
| FBXL13     | rs56376556  | 7 | 102,038,318 | T | C | 5.33   | 5.33   | 1.7x10 <sup>-5</sup>   | 217   | 534,233 | 101,998,515 | 102,532,747 | 95    | 101,998,515 | 102,400,109 | 401,595 |
| FBXL13     | rs11496066  | 7 | 102,486,254 | T | C | 81.8   | 18.2   | 1.1x10 <sup>-8</sup>   | 176   | 981,655 | 101,998,515 | 102,980,169 | 121   | 101,998,515 | 102,902,565 | 904,051 |
| RELN       | rs62482405  | 7 | 102,987,583 | G | T | 8.19   | 8.19   | 6.9x10 <sup>-6</sup>   | 1,320 | 996,423 | 102,489,118 | 103,485,540 | 346   | 102,553,366 | 103,473,515 | 920,150 |
| RELN       | rs39328     | 7 | 103,444,978 | T | C | 43.3   | 43.3   | 3.7x10 <sup>-8</sup>   | 66    | 990,544 | 102,946,088 | 103,936,631 | 35    | 103,006,613 | 103,531,911 | 525,299 |
| CTTNBP2    | rs6976111   | 7 | 117,495,667 | A | C | 31.3   | 31.3   | 1.2x10 <sup>-8</sup>   | 36    | 508,226 | 117,086,613 | 117,594,838 | 15    | 117,495,667 | 117,590,626 | 94,960  |
| KLF14      | rs2268382   | 7 | 130,027,037 | C | A | 32.7   | 32.7   | 7.4x10 <sup>-6</sup>   | 844   | 567,254 | 129,958,098 | 130,525,351 | 233   | 129,964,539 | 130,506,439 | 541,901 |
| KLF14      | rs1562396   | 7 | 130,457,914 | G | A | 31.9   | 31.9   | 9.9x10 <sup>-18</sup>  | 26    | 40,188  | 130,427,388 | 130,467,575 | 26    | 130,430,969 | 130,467,575 | 36,607  |
| AOC1       | rs62492368  | 7 | 150,537,635 | A | G | 30.8   | 30.8   | 1.1x10 <sup>-10</sup>  | 42    | 37,872  | 150,504,840 | 150,542,711 | 51    | 150,504,840 | 150,542,711 | 37,872  |
| MNX1       | rs6459733   | 7 | 156,930,550 | G | C | 67.3   | 32.7   | 2.4x10 <sup>-17</sup>  | 78    | 102,375 | 156,930,550 | 157,032,924 | 76    | 156,930,550 | 157,032,924 | 102,375 |
| MSRA       | rs17689007  | 8 | 9,974,824   | G | A | 53.3   | 46.7   | 2.5x10 <sup>-9</sup>   | 20    | 22,672  | 9,973,718   | 9,996,389   | 18    | 9,973,718   | 9,996,389   | 22,672  |
| XKR6       | rs57327348  | 8 | 10,808,687  | A | T | 78.2   | 21.8   | 4.5x10 <sup>-18</sup>  | 160   | 618,694 | 10,630,568  | 11,249,261  | 145   | 10,630,568  | 11,161,310  | 530,743 |
| LPL        | rs10096633  | 8 | 19,830,921  | C | T | 87.7   | 12.3   | 1.1x10 <sup>-12</sup>  | 51    | 115,012 | 19,819,328  | 19,934,339  | 46    | 19,819,328  | 19,934,339  | 115,012 |
| PURG       | rs10954772  | 8 | 30,863,938  | T | C | 31.4   | 31.4   | 1.8x10 <sup>-9</sup>   | 20    | 28,404  | 30,835,535  | 30,863,938  | 21    | 30,828,375  | 30,863,938  | 35,564  |
| ANK1       | rs13262861  | 8 | 41,508,577  | C | A | 82.9   | 17.1   | 4.0x10 <sup>-12</sup>  | 9     | 16,323  | 41,508,577  | 41,524,899  | 2     | 41,508,577  | 41,522,997  | 14,415  |
| ANK1       | rs4736819   | 8 | 41,509,915  | T | C | 55.4   | 44.6   | 5.4x10 <sup>-7</sup>   | 1,474 | 996,457 | 41,009,939  | 42,006,395  | 99    | 41,073,424  | 41,976,334  | 902,911 |
| ANK1       | rs148766658 | 8 | 41,552,046  | C | T | 3.78   | 3.78   | 5.7x10 <sup>-7</sup>   | 384   | 942,125 | 41,062,358  | 42,004,482  | 147   | 41,073,424  | 42,003,850  | 930,427 |
| TP53INP1   | rs11786992  | 8 | 95,685,147  | A | C | 64.4   | 35.6   | 5.3x10 <sup>-6</sup>   | 1,909 | 723,324 | 95,461,791  | 96,185,114  | 1,415 | 95,461,969  | 96,184,234  | 722,266 |
| TP53INP1   | rs10097617  | 8 | 95,961,626  | T | C | 48.5   | 48.5   | 3.3x10 <sup>-11</sup>  | 14    | 56,937  | 95,911,477  | 95,968,413  | 10    | 95,926,890  | 95,968,413  | 41,524  |
| TP53INP1   | rs187936726 | 8 | 96,092,422  | G | A | 2.39   | 2.39   | 5.4x10 <sup>-6</sup>   | 2,329 | 868,216 | 95,593,358  | 96,461,573  | 1,627 | 95,595,702  | 96,461,573  | 865,872 |
| CPQ        | rs149364428 | 8 | 97,737,741  | A | G | 1.04   | 1.04   | 1.8x10 <sup>-12</sup>  | 2     | 13,312  | 97,724,430  | 97,737,741  | 2     | 97,724,430  | 97,737,741  | 13,312  |
| TRHR       | rs12680028  | 8 | 110,123,183 | C | G | 53.4   | 46.6   | 2.5x10 <sup>-8</sup>   | 117   | 111,250 | 110,029,315 | 110,140,564 | 119   | 110,029,315 | 110,140,564 | 111,250 |
| SLC30A8    | rs3802177   | 8 | 118,185,025 | G | A | 68.5   | 31.5   | 1.1x10 <sup>-55</sup>  | 5     | 19,238  | 118,184,783 | 118,204,020 | 2     | 118,184,783 | 118,185,025 | 243     |
| SLC30A8    | rs80244329  | 8 | 118,404,672 | G | A | 97.8   | 21.9   | 6.9x10 <sup>-6</sup>   | 1,770 | 780,008 | 117,905,012 | 118,685,019 | 1,674 | 117,905,012 | 118,684,994 | 779,983 |
| CASC11     | rs17772814  | 8 | 128,711,742 | G | A | 91.5   | 8.49   | 5.4x10 <sup>-10</sup>  | 1     | 1       | 128,711,742 | 128,711,742 | 1     | 128,711,742 | 128,711,742 | 1       |
| PVT1       | rs1561927   | 8 | 129,568,078 | C | T | 26.9   | 26.9   | 1.5x10 <sup>-9</sup>   | 55    | 32,546  | 129,538,595 | 129,571,140 | 52    | 129,538,595 | 129,571,140 | 32,546  |
| BOP1       | rs4977213   | 8 | 145,507,304 | C | T | 37.5   | 37.5   | 9.1x10 <sup>-14</sup>  | 13    | 38,733  | 145,507,304 | 145,546,036 | 13    | 145,507,304 | 145,546,036 | 38,733  |
| BOP1       | rs12719778  | 8 | 145,879,883 | T | C | 53.8   | 46.2   | 5.0x10 <sup>-9</sup>   | 76    | 301,061 | 145,706,276 | 146,007,336 | 74    | 145,639,726 | 146,007,336 | 367,611 |
| GLIS3      | rs510807    | 9 | 3,965,689   | A | C | 49.1   | 49.1   | 1.4x10 <sup>-6</sup>   | 2,455 | 673,711 | 3,791,962   | 4,465,672   | 2,087 | 3,792,088   | 4,464,795   | 672,708 |
| GLIS3      | rs79103584  | 9 | 4,243,045   | T | A | 98.6   | 1.38   | 4.4x10 <sup>-6</sup>   | 1,893 | 950,944 | 3,792,088   | 4,743,031   | 1,257 | 3,792,767   | 4,743,022   | 950,256 |
| GLIS3      | rs10974438  | 9 | 4,291,928   | C | A | 35.7   | 35.7   | 1.5x10 <sup>-14</sup>  | 2     | 6,662   | 4,291,928   | 4,298,589   | 2     | 4,291,928   | 4,298,589   | 6,662   |
| HAUS6      | rs7022807   | 9 | 19,067,833  | G | A | 40.1   | 40.1   | 2.7x10 <sup>-10</sup>  | 47    | 68,665  | 19,030,303  | 19,098,967  | 40    | 19,034,737  | 19,098,967  | 64,231  |
| FOCAD      | rs7867635   | 9 | 20,241,069  | C | T | 41.2   | 41.2   | 4.0x10 <sup>-8</sup>   | 544   | 994,178 | 19,744,948  | 20,739,125  | 340   | 19,769,828  | 20,739,125  | 969,298 |
| FOCAD      | rs7847880   | 9 | 20,662,703  | C | T | 84.3   | 15.7   | 2.1x10 <sup>-6</sup>   | 898   | 577,250 | 20,162,828  | 20,740,077  | 441   | 20,162,828  | 20,740,077  | 577,250 |
| CDKN2A/B   | rs1412830   | 9 | 22,043,612  | C | T | 62.8   | 37.2   | 9.1x10 <sup>-8</sup>   | 66    | 155,129 | 21,966,221  | 22,121,349  | 54    | 21,966,221  | 22,121,349  | 155,129 |
| CDKN2A/B   | rs76011118  | 9 | 22,133,773  | A | G | 3.41   | 3.41   | 1.4x10 <sup>-7</sup>   | 357   | 983,310 | 21,644,592  | 22,627,901  | 55    | 21,794,359  | 22,588,426  | 794,068 |
| CDKN2A/B   | rs10811660  | 9 | 22,134,068  | G | A | 82.8   | 17.2   | 1.4x10 <sup>-115</sup> | 5     | 1,556   | 22,132,698  | 22,134,253  | 3     | 22,134,068  | 22,134,253  | 186     |
| CDKN2A/B   | rs10757283  | 9 | 22,134,172  | T | C | 43.0   | 43.0   | 1.7x10 <sup>-41</sup>  | 5     | 1,007   | 22,133,645  | 22,134,651  | 4     | 22,133,645  | 22,134,651  | 1,007   |
| CDKN2A/B   | rs1333052   | 9 | 22,157,908  | A | C | 66.0   | 34.0   | 6.3x10 <sup>-7</sup>   | 1,169 | 975,302 | 21,658,047  | 22,633,348  | 471   | 21,662,706  | 22,621,995  | 959,290 |
| CDKN2A/B   | rs1575972   | 9 | 22,301,092  | T | A | 96.7   | 3.29   | 3.1x10 <sup>-7</sup>   | 138   | 813,459 | 21,815,148  | 22,628,606  | 82    | 21,981,583  | 22,451,039  | 469,457 |
| LINGO2     | rs1412234   | 9 | 28,410,683  | C | T | 32.3   | 32.3   | 1.9x10 <sup>-10</sup>  | 15    | 14,833  | 28,410,683  | 28,425,515  | 15    | 28,410,683  | 28,425,515  | 14,833  |
| UBAP2      | rs12001437  | 9 | 34,074,476  | C | T | 37.2   | 37.2   | 2.8x10 <sup>-10</sup>  | 129   | 466,136 | 33,664,300  | 34,130,435  | 6     | 33,819,555  | 34,107,505  | 287,951 |
| MTND2P8    | rs11137820  | 9 | 81,359,113  | C | G | 57.5   | 42.5   | 2.9x10 <sup>-8</sup>   | 49    | 51,128  | 81,324,935  | 81,376,062  | 47    | 81,324,935  | 81,376,062  | 51,128  |
| TLE4       | rs1791513   | 9 | 81,905,590  | A | G | 93.2   | 6.83   | 3.1x10 <sup>-14</sup>  | 2     | 60,142  | 81,891,987  | 81,952,128  | 18    | 81,891,987  | 81,947,623  | 55,637  |
| TLE1       | rs2796441   | 9 | 84,308,948  | G | A | 59.2   | 40.8   | 4.4x10 <sup>-24</sup>  | 2     | 2       |             |             |       |             |             |         |

|               |                 |    |             |   |   |        |        |                        |       |         |             |             |       |             |             |         |
|---------------|-----------------|----|-------------|---|---|--------|--------|------------------------|-------|---------|-------------|-------------|-------|-------------|-------------|---------|
| GPM1          | 9:139737088:G:A | 9  | 139,737,088 | A | G | 0.0700 | 0.0700 | 7.9x10 <sup>-6</sup>   | N/A   | N/A     | N/A         | N/A         | N/A   | N/A         | N/A         | N/A     |
| CDC123/CAMK1D | rs11257655      | 10 | 12,307,894  | T | C | 21.8   | 21.8   | 1.5x10 <sup>-22</sup>  | 1     | 1       | 12,307,894  | 12,307,894  | 1     | 12,307,894  | 12,307,894  | 1       |
| NEUROG3       | rs177045        | 10 | 71,321,279  | G | A | 31.6   | 31.6   | 6.6x10 <sup>-38</sup>  | 2     | 337     | 71,320,943  | 71,321,279  | 3     | 71,320,943  | 71,332,204  | 11,262  |
| NEUROG3       | rs61850200      | 10 | 71,321,658  | C | G | 27.7   | 27.7   | 7.3x10 <sup>-6</sup>   | 2,560 | 854,835 | 70,966,757  | 71,821,591  | 1,198 | 70,966,757  | 71,820,982  | 854,226 |
| NEUROG3       | rs41277236      | 10 | 71,332,301  | T | C | 4.31   | 4.31   | 1.5x10 <sup>-6</sup>   | 2,519 | 865,527 | 70,966,757  | 71,832,283  | 3     | 71,332,301  | 71,446,372  | 114,072 |
| NEUROG3       | rs549498088     | 10 | 71,347,311  | T | C | 0.600  | 0.600  | 4.7x10 <sup>-7</sup>   | N/A   | N/A     | N/A         | N/A         | N/A   | N/A         | N/A         | N/A     |
| NEUROG3       | rs2642588       | 10 | 71,466,578  | G | T | 70.2   | 29.8   | 2.2x10 <sup>-34</sup>  | 18    | 26,683  | 71,464,178  | 71,490,860  | 19    | 71,464,178  | 71,490,860  | 26,683  |
| ZMIZ1         | rs703972        | 10 | 80,952,826  | G | C | 53.3   | 46.7   | 1.7x10 <sup>-29</sup>  | 10    | 10,832  | 80,942,620  | 80,953,451  | 10    | 80,942,620  | 80,953,451  | 10,832  |
| ZMIZ1         | rs1317617       | 10 | 81,096,589  | G | A | 79.8   | 20.2   | 1.8x10 <sup>-6</sup>   | 1,583 | 855,529 | 80,596,754  | 81,452,282  | 861   | 80,598,052  | 81,452,282  | 854,231 |
| PTEN          | rs11202627      | 10 | 89,769,340  | T | C | 15.2   | 15.2   | 4.7x10 <sup>-8</sup>   | 122   | 817,608 | 89,269,373  | 90,086,980  | 67    | 89,344,293  | 89,769,340  | 425,048 |
| HHEX/IDE      | rs7078559       | 10 | 93,924,663  | T | C | 57.8   | 42.2   | 4.1x10 <sup>-7</sup>   | 175   | 678,129 | 93,677,823  | 94,355,951  | 122   | 93,667,030  | 94,134,467  | 467,438 |
| HHEX/IDE      | rs10882101      | 10 | 94,462,427  | T | C | 58.7   | 41.3   | 1.4x10 <sup>-8</sup>   | 10    | 21,703  | 94,444,793  | 94,466,495  | 10    | 94,430,497  | 94,466,427  | 35,931  |
| HHEX/IDE      | rs1112718       | 10 | 94,479,107  | A | G | 59.8   | 40.2   | 5.0x10 <sup>-7</sup>   | 1,828 | 998,391 | 93,980,048  | 94,978,438  | 754   | 93,980,048  | 94,972,243  | 992,196 |
| TCF7L2        | rs536643418     | 10 | 114,699,835 | G | C | 0.520  | 0.520  | 2.6x10 <sup>-8</sup>   | N/A   | N/A     | N/A         | N/A         | N/A   | N/A         | N/A         | N/A     |
| TCF7L2        | rs140242150     | 10 | 114,702,962 | A | G | 0.500  | 0.500  | 2.2x10 <sup>-8</sup>   | 4     | 81,965  | 114,702,962 | 114,784,926 | 5     | 114,702,962 | 114,899,115 | 196,154 |
| TCF7L2        | rs7918400       | 10 | 114,703,136 | T | C | 47.6   | 47.6   | 2.0x10 <sup>-15</sup>  | 4     | 9,547   | 114,702,608 | 114,712,154 | 5     | 114,702,608 | 114,712,154 | 9,547   |
| TCF7L2        | rs184509201     | 10 | 114,740,337 | C | G | 98.2   | 1.82   | 1.2x10 <sup>-33</sup>  | 9     | 6,502   | 114,736,670 | 114,743,171 | 8     | 114,736,670 | 114,743,171 | 6,502   |
| TCF7L2        | rs180988137     | 10 | 114,751,173 | G | A | 1.04   | 1.04   | 6.1x10 <sup>-6</sup>   | 1,979 | 984,191 | 114,266,338 | 115,250,528 | 1,608 | 114,266,992 | 115,250,528 | 983,537 |
| TCF7L2        | rs7903146       | 10 | 114,758,349 | C | T | 70.6   | 29.5   | 5.8x10 <sup>-447</sup> | 3     | 4,279   | 114,754,071 | 114,758,349 | 2     | 114,754,071 | 114,758,349 | 4,279   |
| TCF7L2        | rs78025551      | 10 | 114,757,956 | C | G | 85.1   | 14.9   | 1.6x10 <sup>-7</sup>   | 339   | 985,504 | 114,271,035 | 115,256,538 | 133   | 114,430,588 | 115,240,149 | 938,562 |
| TCF7L2        | rs34855922      | 10 | 114,871,594 | A | G | 71.6   | 28.4   | 5.5x10 <sup>-32</sup>  | 2     | 2,813   | 114,871,594 | 114,874,406 | 2     | 114,871,594 | 114,874,406 | 2,813   |
| WDR11         | rs72631105      | 10 | 122,915,345 | A | G | 19.0   | 19.0   | 3.7x10 <sup>-9</sup>   | 468   | 994,351 | 122,417,658 | 123,412,008 | 669   | 122,422,709 | 123,412,008 | 989,300 |
| PLEKHA1       | rs2280141       | 10 | 124,193,181 | T | G | 51.6   | 48.4   | 1.4x10 <sup>-33</sup>  | 25    | 59,193  | 124,139,393 | 124,198,585 | 26    | 124,134,803 | 124,198,585 | 63,783  |
| INS/IGF2      | rs12802972      | 11 | 1,704,596   | A | G | 42.8   | 42.8   | 1.5x10 <sup>-6</sup>   | 591   | 989,157 | 1,215,046   | 2,204,202   | 574   | 1,219,797   | 2,204,202   | 984,406 |
| INS/IGF2      | rs11042596      | 11 | 2,118,860   | G | T | 66.5   | 33.5   | 2.0x10 <sup>-8</sup>   | 144   | 893,553 | 1,665,146   | 2,558,698   | 118   | 1,858,632   | 2,418,136   | 559,505 |
| INS/IGF2      | rs555759341     | 11 | 2,151,761   | C | G | 0.490  | 0.490  | 3.6x10 <sup>-8</sup>   | 43    | 694,695 | 1,864,004   | 2,558,698   | 186   | 1,653,505   | 2,558,698   | 905,194 |
| INS/IGF2      | rs571342427     | 11 | 2,182,519   | C | T | 0.150  | 0.150  | 1.0x10 <sup>-6</sup>   | N/A   | N/A     | N/A         | N/A         | N/A   | N/A         | N/A         | N/A     |
| INS/IGF2      | rs4929965       | 11 | 2,197,286   | A | G | 38.3   | 38.3   | 4.0x10 <sup>-26</sup>  | 13    | 3,690   | 2,193,597   | 2,197,286   | 12    | 2,193,840   | 2,197,286   | 3,447   |
| KCNQ1         | rs4930091       | 11 | 2,372,356   | C | T | 75.9   | 24.1   | 3.7x10 <sup>-6</sup>   | 2,086 | 998,827 | 1,873,014   | 2,871,840   | 930   | 1,883,395   | 2,865,413   | 982,019 |
| KCNQ1         | rs2283164       | 11 | 2,579,163   | A | G | 94.7   | 5.32   | 1.2x10 <sup>-7</sup>   | 743   | 997,379 | 2,080,612   | 3,077,990   | 784   | 2,080,612   | 3,078,885   | 998,274 |
| KCNQ1         | rs80102379      | 11 | 2,634,177   | G | T | 98.2   | 1.78   | 9.3x10 <sup>-8</sup>   | 108   | 970,840 | 2,140,569   | 3,111,408   | 13    | 2,283,950   | 2,950,558   | 666,609 |
| KCNQ1         | rs231349        | 11 | 2,672,821   | T | C | 10.2   | 10.2   | 1.3x10 <sup>-11</sup>  | 33    | 37,439  | 2,643,377   | 2,680,815   | 32    | 2,643,878   | 2,680,815   | 36,938  |
| KCNQ1         | rs231361        | 11 | 2,691,500   | A | G | 25.6   | 25.6   | 5.0x10 <sup>-25</sup>  | 1     | 1       | 2,691,500   | 2,691,500   | 1     | 2,691,500   | 2,691,500   | 1       |
| KCNQ1         | rs2283220       | 11 | 2,755,548   | A | G | 69.0   | 31.0   | 1.4x10 <sup>-9</sup>   | 4     | 54      | 2,755,548   | 2,755,601   | 6     | 2,752,593   | 2,799,679   | 47,087  |
| KCNQ1         | rs234853        | 11 | 2,850,828   | G | A | 24.8   | 24.8   | 6.8x10 <sup>-16</sup>  | 8     | 14,095  | 2,843,803   | 2,857,897   | 9     | 2,840,424   | 2,857,897   | 17,474  |
| KCNQ1         | rs2237895       | 11 | 2,857,194   | C | A | 42.6   | 42.6   | 6.0x10 <sup>-52</sup>  | 1     | 1       | 2,857,194   | 2,857,194   | 1     | 2,857,194   | 2,857,194   | 1       |
| KCNQ1         | rs2237897       | 11 | 2,858,546   | C | T | 95.4   | 4.57   | 8.4x10 <sup>-32</sup>  | 3     | 197     | 2,858,440   | 2,858,636   | 3     | 2,858,440   | 2,858,636   | 197     |
| KCNQ1         | rs445084        | 11 | 2,908,754   | G | A | 36.1   | 36.1   | 1.7x10 <sup>-6</sup>   | 2,491 | 999,795 | 2,408,916   | 3,408,710   | 594   | 2,408,916   | 3,400,820   | 991,905 |
| PDE3B         | rs141521721     | 11 | 14,763,828  | A | C | 2.36   | 2.36   | 2.7x10 <sup>-8</sup>   | 79    | 804,833 | 14,299,149  | 15,103,981  | 88    | 14,299,149  | 15,103,981  | 804,833 |
| KCNJ11        | rs5213          | 11 | 17,408,404  | C | T | 36.2   | 36.2   | 3.5x10 <sup>-27</sup>  | 6     | 10,074  | 17,408,404  | 17,418,477  | 3     | 17,408,404  | 17,409,572  | 1,169   |
| KCNJ11        | rs67254669      | 11 | 17,470,143  | G | A | 0.110  | 0.110  | 1.1x10 <sup>-8</sup>   | N/A   | N/A     | N/A         | N/A         | N/A   | N/A         | N/A         | N/A     |
| METTL5        | rs4923543       | 11 | 28,534,898  | A | G | 33.2   | 33.2   | 4.5x10 <sup>-8</sup>   | 1,875 | 998,356 | 28,036,270  | 29,034,625  | 1,665 | 28,036,270  | 29,034,454  | 998,185 |
| QSER1         | rs7943101       | 11 | 32,460,873  | T | C | 16.1   | 16.1   | 8.5x10 <sup>-6</sup>   | 1,150 | 533,000 | 32,427,823  | 32,960,822  | 649   | 32,427,823  | 32,960,822  | 533,000 |
| QSER1         | rs145678014     | 11 | 32,927,778  | G | T | 95.7   | 4.33   | 2.0x10 <sup>-10</sup>  | 58    | 360,895 | 32,955,598  | 32,956,492  | 22    | 32,955,598  | 32,956,492  | 360,895 |
| QSER1         | rs528122639     | 11 | 33,091,735  | A | G | 0.0900 | 0.0900 | 1.6x10 <sup>-7</sup>   | N/A   | N/A     | N/A         | N/A         | N/A   | N/A         | N/A         | N/A     |
| PDHX          | rs286925        | 11 | 34,642,668  | A | G | 18.2   | 18.2   | 5.0x10 <sup>-6</sup>   | 1,597 | 658,488 | 34,484,090  | 35,142,577  | 311   | 34,482,908  | 35,104,315  | 621,408 |
| PDHX          | rs2767036       | 11 | 34,982,148  | C | A | 29.1   | 29.1   | 3.3x10 <sup>-9</sup>   | 273   | 272,253 | 34,759,989  | 35,032,241  | 254   | 34,759,989  | 35,032,241  | 272,253 |
| HSD17B12      | rs1061810       | 11 | 43,877,934  | A | C | 28.8   | 28.8   | 6.0x10 <sup>-13</sup>  | 67    | 125,964 | 43,752,522  | 43,878,485  | 66    | 43,752,522  | 43,878,485  | 125,964 |
| CRY2          | rs7115753       | 11 | 45,912,013  | A | G | 44.9   | 44.9   | 3.8x10 <sup>-9</sup>   | 29    | 74,557  | 45,837,457  | 45,912,013  | 22    | 45,839,889  | 45,912,013  | 72,125  |
| CELF1         | rs7124681       | 11 | 47,529,947  | A | C | 41.0   | 41.0   | 5.1x10 <sup>-9</sup>   | 223   | 603,428 | 47,385,350  | 47,988,777  | 185   | 47,437,033  | 48,001,082  | 564,050 |
| MAP3K11       | rs1783541       | 11 | 65,294,799  | T | C | 20.4   | 20.4   | 2.0x10 <sup>-14</sup>  | 12    | 79,725  | 65,257,527  | 65,337,251  | 11    | 65,263,895  | 65,337,251  | 73,357  |
| CCND1         | rs61881115      | 11 | 68,997,225  | G | A | 83.8   | 16.2   | 4.1x10 <sup>-7</sup>   | 97    | 521,852 | 68,951,753  | 69,473,604  | 121   | 68,951,753  | 69,489,910  | 538,158 |
| CCND1         | rs11820019      | 11 | 69,448,758  | T | C | 97.3   | 2.67   | 5.1x10 <sup>-12</sup>  | 12    | 14,922  | 69,448,758  | 69,463,679  | 11    | 69,448,758  | 69,463,679  | 14,922  |
| CENTD2/ARAP1  | rs77464186      | 11 | 72,460,398  | A | C | 83.6   | 16.4   | 4.7x10 <sup>-33</sup>  | 9     | 33,857  | 72,429,579  | 72,463,435  | 9     | 72,428,172  | 72,463,435  | 35,264  |
| MTNR1B        | rs10830963      | 11 | 92,708,710  | G | C | 27.7   | 27.7   | 4.8x10 <sup>-43</sup>  | 1     | 1       | 92,708,710  | 92,708,710  | 1     | 92,708,710  | 92,708,710  | 1       |
| MTNR1B        | rs57235767      | 11 | 93,013,531  | C | T | 70.6   | 29.4   | 5.9x10 <sup>-10</sup>  | 63    | 192,919 | 93,013,387  | 93,206,305  | 35    | 93,013,387  | 93,206,305  | 192,919 |
| ETS1          | rs10893829      | 11 | 128,042,575 | T | C | 85.3   | 14.7   | 1.3x10 <sup>-10</sup>  | 22    | 26,881  | 128,017,940 | 128,044,820 | 20    | 128,017,940 | 128,044,820 | 26,881  |
| ETS1          | rs10750397      | 11 | 128,234,144 | A | G | 28.2   | 28.2   | 8.3x10 <sup>-13</sup>  | 20    | 25,554  | 128,210,505 | 128,236,058 | 17    | 128,213,026 | 128,236,058 | 23,033  |
| ETS1          | rs67232546      | 11 | 128,398,938 | T | C | 20.7   | 20.7   | 1.3x10 <sup>-11</sup>  | 6     | 15,862  | 128,383,077 | 128,398,938 | 5     | 128,383,687 | 128,398,938 | 15,252  |
| ETS1          | rs112595469     | 11 | 128,583,975 | T | C | 2.84   | 2.84   | 6.2x10 <sup>-6</sup>   | 1,298 | 813,591 | 128,084,439 | 128,898,029 | 997   | 128,084,485 | 128,898,029 | 813,545 |
| CCND2         | rs10848958      | 12 | 4,031,104   | C | T | 80.4   | 19.6   | 1.5x10 <sup>-7</sup>   | 170   | 609,491 | 3,913,211   | 4,522,701   | 84    | 3,913,211   | 4,522,701   | 609,491 |
| CCND2         | rs11063028      | 12 | 4,300,172   | C | T | 18.0   | 18.0   | 8.5x10 <sup>-11</sup>  | 13    | 12,809  | 4,288,001   | 4,300,809   | 13    | 4,288,001   | 4,300,809   | 12,809  |
| CCND2         | rs4238013       | 12 | 4,376,089   | C | T | 20.9   | 20.9   | 3.2x10 <sup>-11</sup>  | 3     | 13,181  | 4,362,909   | 4,376,089   | 3     | 4,362,909   | 4,376,089   | 13,181  |
| CCND2         | rs3217792       | 12 | 4,384,696   | C | T | 91.3   | 8.69   | 2.6x10 <sup>-21</sup>  | 1     | 1       | 4,384,696   | 4,384,696   | 1     | 4,384,696   | 4,384,696   | 1       |
| CCND2         | rs76895963      | 12 | 4,384,844   | T | G | 98.0   | 1.98   | 1.4x10 <sup>-69</sup>  | 1     | 1       | 4,384,844   | 4,384,844   | 1     | 4,384,844   | 4,384,844   | 1       |
| CCND2         | rs3217860       | 12 | 4,399,050   | G | A | 25.8   | 25.8   | 3.9x10 <sup>-9</sup>   | 4     | 253,981 | 4,145,516   | 4,399,496   | 2     | 4,398,497   | 4,399,050   | 554     |
| CDKN1B        | rs2066827       | 12 | 12,871,099  | G | T |        |        |                        |       |         |             |             |       |             |             |         |

|             |             |    |             |   |   |        |        |                       |       |         |             |             |       |             |             |         |
|-------------|-------------|----|-------------|---|---|--------|--------|-----------------------|-------|---------|-------------|-------------|-------|-------------|-------------|---------|
| TSPAN8/LGR5 | rs1796330   | 12 | 71,522,953  | G | C | 57.1   | 42.9   | 2.2x10 <sup>-14</sup> | 119   | 131,397 | 71,408,690  | 71,540,086  | 116   | 71,409,261  | 71,538,310  | 129,050 |
| USP44       | rs2197973   | 12 | 95,928,560  | T | C | 53.8   | 46.3   | 3.6x10 <sup>-8</sup>  | 83    | 404,347 | 95,527,476  | 95,931,822  | 54    | 95,527,476  | 95,928,560  | 401,085 |
| RMST        | rs579111467 | 12 | 97,562,756  | A | G | 0.0300 | 0.0300 | 1.7x10 <sup>-6</sup>  | N/A   | N/A     | N/A         | N/A         | N/A   | N/A         | N/A         | N/A     |
| RMST        | rs557027608 | 12 | 97,779,248  | A | G | 0.0600 | 0.0600 | 2.7x10 <sup>-7</sup>  | N/A   | N/A     | N/A         | N/A         | N/A   | N/A         | N/A         | N/A     |
| RMST        | rs77864822  | 12 | 97,848,775  | A | G | 93.2   | 6.76   | 1.1x10 <sup>-8</sup>  | 18    | 24,363  | 97,843,343  | 97,867,705  | 20    | 97,843,343  | 97,868,906  | 25,564  |
| WSCD2       | rs1426371   | 12 | 108,629,780 | G | A | 73.9   | 26.1   | 8.2x10 <sup>-12</sup> | 3     | 20,147  | 108,609,634 | 108,629,780 | 3     | 108,609,634 | 108,629,780 | 20,147  |
| KSR2        | rs34965774  | 12 | 118,412,373 | A | G | 14.4   | 14.4   | 2.0x10 <sup>-9</sup>  | 10    | 20,919  | 118,394,008 | 118,414,926 | 10    | 118,394,008 | 118,414,926 | 20,919  |
| KSR2        | rs12578639  | 12 | 118,489,636 | A | T | 82.8   | 17.2   | 2.2x10 <sup>-6</sup>  | 993   | 919,999 | 117,991,656 | 118,911,654 | 78    | 118,204,979 | 118,843,443 | 638,465 |
| HNF1A       | rs11065299  | 12 | 121,297,815 | A | G | 7.54   | 7.54   | 5.8x10 <sup>-7</sup>  | 895   | 864,004 | 120,932,742 | 121,796,745 | 631   | 120,933,092 | 121,790,178 | 857,087 |
| HNF1A       | rs73226260  | 12 | 121,380,541 | G | A | 96.7   | 3.31   | 5.9x10 <sup>-11</sup> | 22    | 42,553  | 121,381,097 | 121,423,649 | 20    | 121,381,097 | 121,422,243 | 41,147  |
| HNF1A       | rs1800574   | 12 | 121,416,864 | T | C | 2.96   | 2.96   | 1.7x10 <sup>-12</sup> | 2     | 443     | 121,416,864 | 121,417,306 | 1     | 121,416,864 | 121,416,864 | 1       |
| HNF1A       | rs56348580  | 12 | 121,432,117 | G | C | 68.9   | 31.1   | 2.3x10 <sup>-13</sup> | 5     | 27,423  | 121,429,194 | 121,456,616 | 3     | 121,432,117 | 121,455,589 | 23,473  |
| HNF1A       | rs28638142  | 12 | 121,501,461 | A | C | 4.42   | 4.42   | 2.9x10 <sup>-6</sup>  | 1,954 | 927,549 | 121,004,376 | 121,931,924 | 1,216 | 121,004,376 | 121,928,221 | 923,846 |
| HNF1A       | rs73224262  | 12 | 121,882,395 | T | C | 0.680  | 0.680  | 9.1x10 <sup>-7</sup>  | 116   | 539,850 | 121,382,697 | 121,922,546 | 36    | 121,386,617 | 121,922,546 | 535,930 |
| MPHOSPH9    | rs4148856   | 12 | 123,450,765 | C | G | 78.1   | 21.9   | 1.7x10 <sup>-10</sup> | 208   | 612,745 | 123,296,204 | 123,908,948 | 180   | 123,296,204 | 123,897,177 | 600,974 |
| ZNF664      | rs7978610   | 12 | 124,468,572 | G | C | 66.6   | 33.5   | 2.0x10 <sup>-8</sup>  | 99    | 147,139 | 124,348,065 | 124,495,203 | 94    | 124,042,718 | 124,495,203 | 90,486  |
| ZNF664      | rs825452    | 12 | 124,509,177 | A | G | 60.3   | 39.7   | 2.4x10 <sup>-6</sup>  | 2,288 | 958,044 | 124,009,190 | 124,967,233 | 1,824 | 124,009,190 | 124,968,406 | 959,217 |
| FBRSL1      | rs12811407  | 12 | 133,069,698 | A | G | 33.1   | 33.1   | 1.7x10 <sup>-12</sup> | 11    | 21,899  | 133,066,392 | 133,088,290 | 8     | 133,066,392 | 133,088,290 | 21,899  |
| RNF6        | rs34584161  | 13 | 26,776,999  | A | G | 76.0   | 24.0   | 2.2x10 <sup>-10</sup> | 16    | 22,638  | 26,776,255  | 26,798,892  | 11    | 26,776,999  | 26,797,320  | 20,322  |
| HMG61       | rs11842871  | 13 | 31,042,452  | G | T | 73.5   | 26.6   | 2.1x10 <sup>-8</sup>  | 20    | 27,299  | 31,015,154  | 31,042,452  | 14    | 31,019,580  | 31,042,452  | 22,873  |
| KL          | rs576674    | 13 | 33,554,302  | G | A | 16.9   | 16.9   | 8.3x10 <sup>-10</sup> | 9     | 8,204   | 33,554,302  | 33,562,505  | 7     | 33,554,302  | 33,562,505  | 8,204   |
| DLEU1       | rs963740    | 13 | 51,096,095  | A | T | 71.3   | 28.7   | 2.1x10 <sup>-8</sup>  | 73    | 514,058 | 50,738,924  | 51,252,981  | 5     | 51,087,007  | 51,096,095  | 9,089   |
| PCDH17      | rs9537803   | 13 | 58,366,634  | C | T | 27.7   | 27.7   | 4.6x10 <sup>-8</sup>  | 1,566 | 891,958 | 57,974,269  | 58,866,226  | 318   | 57,986,844  | 58,576,243  | 589,400 |
| PCDH17      | rs9569864   | 13 | 58,965,435  | C | T | 82.5   | 17.5   | 8.7x10 <sup>-8</sup>  | 270   | 922,369 | 58,472,262  | 59,394,630  | 157   | 58,472,262  | 59,184,234  | 711,973 |
| SRGAP2D     | rs9563615   | 13 | 59,077,406  | A | T | 71.0   | 29.0   | 6.4x10 <sup>-11</sup> | 3,909 | 998,840 | 58,578,463  | 59,577,302  | 2,051 | 58,866,706  | 59,576,788  | 710,083 |
| SRGAP2D     | rs76251711  | 13 | 59,184,234  | G | A | 1.26   | 1.26   | 2.3x10 <sup>-6</sup>  | 74    | 707,871 | 58,686,760  | 59,394,630  | 44    | 58,686,760  | 59,184,234  | 497,475 |
| SPRY2       | rs1359790   | 13 | 80,717,156  | G | A | 72.0   | 28.0   | 2.4x10 <sup>-11</sup> | 10    | 11,842  | 80,705,315  | 80,717,156  | 9     | 80,705,315  | 80,717,156  | 11,842  |
| IRS2        | rs7987740   | 13 | 109,947,213 | T | C | 60.9   | 39.1   | 4.0x10 <sup>-8</sup>  | 71    | 182,606 | 109,833,363 | 110,015,968 | 26    | 109,850,598 | 110,004,571 | 153,974 |
| IRS2        | rs4771648   | 13 | 110,431,626 | G | A | 66.9   | 33.2   | 8.9x10 <sup>-8</sup>  | 28    | 294,886 | 110,151,979 | 110,446,864 | 8     | 110,420,832 | 110,446,864 | 26,033  |
| SLC7A7      | rs17122772  | 14 | 23,288,935  | G | C | 22.8   | 22.8   | 1.6x10 <sup>-8</sup>  | 5     | 8,393   | 23,280,797  | 23,289,189  | 4     | 23,288,935  | 23,289,189  | 255     |
| AKAP6       | rs17522122  | 14 | 33,302,882  | T | G | 47.4   | 47.4   | 3.2x10 <sup>-9</sup>  | 33    | 16,615  | 33,292,743  | 33,309,357  | 33    | 33,292,743  | 33,309,357  | 16,615  |
| CLEC14A     | rs18017808  | 14 | 38,848,419  | G | T | 74.3   | 25.7   | 2.1x10 <sup>-8</sup>  | 69    | 92,264  | 38,756,561  | 38,848,824  | 68    | 38,756,561  | 38,848,824  | 92,264  |
| NRXN3       | rs17836088  | 14 | 79,932,041  | C | G | 21.7   | 21.7   | 6.7x10 <sup>-14</sup> | 16    | 54,707  | 79,890,456  | 79,945,162  | 16    | 79,890,456  | 79,945,162  | 54,707  |
| SMEK1       | rs8010382   | 14 | 91,963,722  | G | A | 42.1   | 42.1   | 6.5x10 <sup>-9</sup>  | 130   | 188,041 | 91,871,672  | 92,059,712  | 105   | 91,860,800  | 92,041,956  | 181,157 |
| MARK3       | rs62007683  | 14 | 103,894,071 | G | T | 65.3   | 34.7   | 3.1x10 <sup>-8</sup>  | 91    | 153,436 | 103,852,725 | 104,006,160 | 88    | 103,851,272 | 104,006,160 | 154,889 |
| RASGRP1     | rs8032939   | 15 | 38,834,033  | C | T | 24.6   | 24.6   | 3.5x10 <sup>-14</sup> | 12    | 19,624  | 38,828,140  | 38,847,763  | 11    | 38,828,140  | 38,846,738  | 18,599  |
| RASGRP1     | rs34715063  | 15 | 38,873,115  | C | T | 12.4   | 12.4   | 2.3x10 <sup>-19</sup> | 2     | 20,730  | 38,852,386  | 38,873,115  | 2     | 38,852,386  | 38,873,115  | 20,730  |
| LTK         | rs11070332  | 15 | 41,809,205  | A | G | 35.8   | 35.8   | 1.1x10 <sup>-13</sup> | 9     | 31,697  | 41,801,512  | 41,833,208  | 14    | 41,801,512  | 41,836,234  | 34,723  |
| LTK         | rs543786825 | 15 | 42,201,410  | T | C | 0.0400 | 0.0400 | 4.7x10 <sup>-6</sup>  | N/A   | N/A     | N/A         | N/A         | N/A   | N/A         | N/A         | N/A     |
| ONECUT1     | rs2456530   | 15 | 53,091,553  | T | C | 12.7   | 12.7   | 5.4x10 <sup>-10</sup> | 52    | 95,541  | 53,070,141  | 53,165,681  | 51    | 53,058,612  | 53,165,681  | 107,070 |
| WDR72       | rs528350911 | 15 | 53,747,228  | G | C | 0.680  | 0.680  | 2.1x10 <sup>-8</sup>  | 1     | 1       | 53,747,228  | 53,747,228  | 1     | 53,747,228  | 53,747,228  | 1       |
| TCF12       | rs117483894 | 15 | 57,456,802  | G | A | 3.69   | 3.69   | 3.9x10 <sup>-8</sup>  | 188   | 642,956 | 56,968,627  | 57,611,582  | 179   | 56,957,179  | 57,611,582  | 654,404 |
| C2CD4A/B    | rs8037894   | 15 | 62,394,264  | G | C | 56.6   | 43.4   | 2.6x10 <sup>-13</sup> | 15    | 15,939  | 62,383,155  | 62,399,093  | 14    | 62,383,155  | 62,399,093  | 15,939  |
| USP3        | rs1718762   | 15 | 63,871,292  | C | T | 46.0   | 46.0   | 5.4x10 <sup>-10</sup> | 109   | 331,410 | 63,800,065  | 64,131,474  | 108   | 63,800,065  | 64,131,474  | 331,410 |
| MAP2K5      | rs4776970   | 15 | 68,080,886  | A | T | 64.1   | 35.9   | 5.0x10 <sup>-9</sup>  | 49    | 167,502 | 67,937,755  | 68,105,256  | 39    | 67,937,755  | 68,120,644  | 182,890 |
| PTPN9       | rs131377    | 15 | 75,932,129  | G | T | 75.9   | 24.1   | 5.6x10 <sup>-10</sup> | 76    | 251,778 | 75,681,000  | 75,932,777  | 50    | 75,693,635  | 75,932,777  | 239,143 |
| HMG20A      | rs1005752   | 15 | 77,818,128  | A | C | 71.5   | 28.5   | 2.5x10 <sup>-29</sup> | 24    | 121,044 | 77,711,719  | 77,832,762  | 20    | 77,711,719  | 77,828,668  | 116,950 |
| AP32        | rs4932265   | 15 | 90,423,293  | T | C | 26.7   | 26.7   | 4.2x10 <sup>-20</sup> | 46    | 81,457  | 90,368,067  | 90,449,523  | 48    | 90,368,067  | 90,449,523  | 81,457  |
| PRC1        | rs12910825  | 15 | 91,511,260  | G | A | 36.1   | 36.1   | 1.6x10 <sup>-15</sup> | 25    | 30,176  | 91,506,452  | 91,536,627  | 37    | 91,503,752  | 91,551,876  | 48,125  |
| ITFG3       | rs6600191   | 16 | 295,795     | T | C | 82.5   | 17.5   | 9.3x10 <sup>-13</sup> | 29    | 20,809  | 294,749     | 315,557     | 28    | 294,749     | 315,557     | 20,809  |
| CLUAP1      | rs3751837   | 16 | 3,583,173   | T | C | 22.0   | 22.0   | 1.4x10 <sup>-8</sup>  | 92    | 984,483 | 3,098,691   | 4,083,173   | 17    | 3,117,993   | 4,071,354   | 953,362 |
| ATP2A1      | rs8046545   | 16 | 28,915,217  | G | A | 35.9   | 35.9   | 1.9x10 <sup>-8</sup>  | 94    | 127,954 | 28,824,685  | 28,952,638  | 97    | 28,833,097  | 28,995,757  | 162,661 |
| FAM57B      | rs11642430  | 16 | 30,045,789  | G | C | 39.9   | 39.9   | 2.2x10 <sup>-9</sup>  | 58    | 159,038 | 29,958,216  | 30,117,253  | 61    | 29,958,216  | 30,117,253  | 159,038 |
| FAM57B      | rs199795270 | 16 | 30,419,384  | C | G | 0.650  | 0.650  | 1.2x10 <sup>-6</sup>  | 117   | 608,973 | 29,935,456  | 30,544,428  | 1     | 30,419,384  | 30,419,384  | 1       |
| FTO         | rs4281707   | 16 | 53,501,946  | G | A | 54.4   | 45.6   | 3.2x10 <sup>-10</sup> | 73    | 115,821 | 53,429,173  | 53,544,993  | 69    | 53,429,173  | 53,544,993  | 115,821 |
| FTO         | rs78020297  | 16 | 53,758,720  | A | G | 5.17   | 5.17   | 6.5x10 <sup>-9</sup>  | 7     | 13,694  | 53,756,885  | 53,770,578  | 7     | 53,756,885  | 53,770,578  | 13,694  |
| FTO         | rs1421085   | 16 | 53,800,954  | C | T | 41.5   | 41.5   | 3.1x10 <sup>-84</sup> | 6     | 8,170   | 53,800,954  | 53,809,123  | 6     | 53,800,954  | 53,809,123  | 8,170   |
| NFAT5       | rs862320    | 16 | 69,651,866  | C | T | 57.8   | 42.2   | 3.9x10 <sup>-11</sup> | 48    | 375,145 | 69,556,583  | 69,931,727  | 50    | 69,556,583  | 69,931,458  | 374,876 |
| BCAR1       | rs72802342  | 16 | 75,234,872  | C | A | 92.3   | 7.69   | 4.0x10 <sup>-32</sup> | 9     | 17,456  | 75,234,872  | 75,252,327  | 8     | 75,234,872  | 75,252,327  | 17,456  |
| BCAR1       | rs3115960   | 16 | 75,516,534  | G | C | 37.0   | 37.0   | 2.8x10 <sup>-6</sup>  | 1,088 | 714,372 | 75,017,106  | 75,731,477  | 657   | 75,016,671  | 75,685,457  | 668,787 |
| CMIP        | rs2925979   | 16 | 81,534,790  | T | C | 30.0   | 30.0   | 1.4x10 <sup>-14</sup> | 2     | 1,002   | 81,533,789  | 81,534,790  | 2     | 81,533,789  | 81,534,790  | 1,002   |
| SPG7        | rs12920022  | 16 | 89,564,055  | A | T | 15.8   | 15.8   | 3.4x10 <sup>-9</sup>  | 70    | 732,951 | 89,252,894  | 89,985,844  | 83    | 89,199,205  | 90,004,693  | 805,489 |
| ZZEF1       | rs1043246   | 17 | 3,828,086   | G | C | 15.7   | 15.7   | 7.9x10 <sup>-7</sup>  | 1,328 | 781,703 | 3,545,811   | 4,327,513   | 801   | 3,546,093   | 4,327,705   | 777,613 |
| ZZEF1       | rs3826482   | 17 | 3,860,356   | A | T | 57.6   | 42.4   | 2.1x10 <sup>-7</sup>  | 421   | 814,074 | 3,546,093   | 4,360,166   | 26    | 3,838,717   | 4,252,684   | 413,968 |
| ZZEF1       | rs1377807   | 17 | 4,045,440   | C | G | 31.2   | 31.2   | 4.2x10 <sup>-13</sup> | 66    | 281,716 | 3,884,026   | 4,165,741   | 59    | 3,884,026   | 4,165,741   | 281,716 |
| ATP1B2      | rs164152    |    |             |   |   |        |        |                       |       |         |             |             |       |             |             |         |



|              |             |    |            |   |   |        |        |                       |       |         |            |            |       |            |            |         |
|--------------|-------------|----|------------|---|---|--------|--------|-----------------------|-------|---------|------------|------------|-------|------------|------------|---------|
| HNF1B        | rs2189301   | 17 | 36,063,685 | G | A | 87.2   | 12.8   | 6.5x10 <sup>-8</sup>  | 7     | 16,340  | 36,048,558 | 36,064,897 | 2     | 36,063,685 | 36,064,897 | 1,213   |
| HNF1B        | rs10908278  | 17 | 36,099,952 | T | A | 48.1   | 48.1   | 6.4x10 <sup>-26</sup> | 4     | 3,726   | 36,099,840 | 36,103,565 | 4     | 36,099,840 | 36,103,565 | 3,726   |
| MLX          | rs34855406  | 17 | 40,731,411 | C | G | 27.7   | 27.7   | 2.3x10 <sup>-12</sup> | 42    | 258,595 | 40,566,240 | 40,824,834 | 36    | 40,610,565 | 40,962,509 | 351,945 |
| TTL6         | rs35895680  | 17 | 47,060,322 | C | A | 67.8   | 32.2   | 2.5x10 <sup>-15</sup> | 118   | 177,089 | 46,917,953 | 47,095,041 | 117   | 46,894,377 | 47,095,041 | 200,665 |
| KIF2B        | rs569511541 | 17 | 52,140,805 | G | A | 0.0200 | 0.0200 | 1.5x10 <sup>-8</sup>  | N/A   | N/A     | N/A        | N/A        | N/A   | N/A        | N/A        | N/A     |
| ACE          | rs2727301   | 17 | 61,965,043 | T | C | 75.4   | 24.6   | 1.3x10 <sup>-6</sup>  | 578   | 759,783 | 61,703,320 | 62,463,102 | 315   | 61,703,320 | 62,461,656 | 758,337 |
| ACE          | rs60276348  | 17 | 62,203,304 | T | C | 14.0   | 14.0   | 2.6x10 <sup>-8</sup>  | 27    | 95,013  | 62,114,233 | 62,209,245 | 27    | 62,117,733 | 62,209,245 | 91,513  |
| BPTF         | rs11657492  | 17 | 65,648,427 | G | T | 10.0   | 10.0   | 5.6x10 <sup>-8</sup>  | 22    | 25,359  | 65,634,625 | 65,659,983 | 22    | 65,634,625 | 65,659,983 | 25,359  |
| BPTF         | rs558308082 | 17 | 65,820,153 | C | G | 0.0800 | 0.0800 | 6.6x10 <sup>-6</sup>  | N/A   | N/A     | N/A        | N/A        | N/A   | N/A        | N/A        | N/A     |
| BPTF         | rs61676547  | 17 | 65,892,507 | C | G | 19.2   | 19.2   | 2.9x10 <sup>-11</sup> | 143   | 169,153 | 65,825,248 | 65,994,400 | 142   | 65,825,248 | 66,098,154 | 272,907 |
| LAMA1        | rs7240767   | 18 | 7,070,642  | C | T | 37.6   | 37.6   | 1.6x10 <sup>-8</sup>  | 24    | 19,825  | 7,063,196  | 7,083,020  | 29    | 7,062,395  | 7,083,020  | 20,626  |
| COMMD9       | rs62080313  | 18 | 36,278,709 | C | T | 12.3   | 12.3   | 1.0x10 <sup>-8</sup>  | 56    | 200,885 | 36,158,210 | 36,359,094 | 60    | 36,158,210 | 36,359,094 | 200,885 |
| TCF4         | rs76197067  | 18 | 52,604,955 | G | A | 0.0500 | 0.0500 | 8.1x10 <sup>-6</sup>  | N/A   | N/A     | N/A        | N/A        | N/A   | N/A        | N/A        | N/A     |
| TCF4         | rs72926932  | 18 | 53,050,646 | C | A | 8.39   | 8.39   | 1.0x10 <sup>-14</sup> | 6     | 37,339  | 53,050,646 | 53,087,984 | 6     | 53,050,646 | 53,087,984 | 37,339  |
| TCF4         | rs28719468  | 18 | 53,452,144 | C | T | 15.9   | 15.9   | 1.9x10 <sup>-6</sup>  | 314   | 594,636 | 52,953,630 | 53,548,265 | 202   | 52,979,074 | 53,498,376 | 519,303 |
| WDR7         | rs17684074  | 18 | 54,675,384 | G | T | 74.0   | 26.0   | 2.9x10 <sup>-8</sup>  | 34    | 351,130 | 54,361,464 | 54,712,593 | 70    | 54,218,790 | 55,105,259 | 823,478 |
| GRP          | rs9957145   | 18 | 56,876,228 | G | A | 82.9   | 17.1   | 8.1x10 <sup>-9</sup>  | 17    | 5,510   | 56,876,228 | 56,881,737 | 18    | 56,876,228 | 56,883,319 | 7,092   |
| MC4R         | rs5232388   | 18 | 57,848,369 | T | A | 23.8   | 23.8   | 7.6x10 <sup>-13</sup> | 74    | 181,548 | 57,732,418 | 57,913,965 | 74    | 57,732,418 | 57,913,965 | 181,548 |
| MC4R         | rs74452128  | 18 | 58,056,566 | C | A | 97.6   | 2.37   | 1.0x10 <sup>-9</sup>  | 44    | 63,213  | 58,024,670 | 58,087,882 | 42    | 58,024,670 | 58,087,882 | 63,213  |
| BCL2A        | rs10469140  | 18 | 60,668,270 | G | A | 48.5   | 48.5   | 6.6x10 <sup>-6</sup>  | 2,545 | 999,354 | 60,345,952 | 61,345,305 | 1,780 | 60,345,952 | 61,167,061 | 821,110 |
| BCL2A        | rs12454712  | 18 | 60,845,884 | T | C | 61.4   | 38.6   | 4.6x10 <sup>-13</sup> | 1     | 1       | 60,845,884 | 60,845,884 | 1     | 60,845,884 | 60,845,884 | 1       |
| UHRF1        | rs7249758   | 19 | 4,948,862  | A | G | 20.4   | 20.4   | 3.4x10 <sup>-9</sup>  | 28    | 154,224 | 4,920,414  | 5,074,637  | 33    | 4,920,414  | 5,086,808  | 166,395 |
| PTPRS        | rs116953931 | 19 | 5,224,998  | A | G | 3.71   | 3.71   | 6.4x10 <sup>-6</sup>  | 2,100 | 722,786 | 4,725,161  | 5,447,946  | 1,482 | 4,725,272  | 5,447,946  | 722,675 |
| INSR         | rs75253922  | 19 | 7,240,848  | C | T | 19.1   | 19.1   | 2.7x10 <sup>-8</sup>  | 34    | 32,352  | 7,216,908  | 7,249,259  | 35    | 7,216,908  | 7,249,259  | 32,352  |
| MAP2K7       | rs4804833   | 19 | 7,970,635  | A | G | 39.0   | 39.0   | 7.7x10 <sup>-13</sup> | 5     | 10,263  | 7,968,168  | 7,978,430  | 4     | 7,968,168  | 7,976,529  | 8,362   |
| FARSA        | rs755734872 | 19 | 12,938,471 | T | C | 0.0500 | 0.0500 | 8.3x10 <sup>-6</sup>  | N/A   | N/A     | N/A        | N/A        | N/A   | N/A        | N/A        | N/A     |
| FARSA        | rs3111316   | 19 | 13,038,415 | A | G | 58.9   | 41.2   | 6.3x10 <sup>-13</sup> | 39    | 95,738  | 12,999,458 | 13,095,195 | 34    | 13,000,247 | 13,095,195 | 94,949  |
| TM6SF2       | rs8107974   | 19 | 19,388,500 | T | A | 7.69   | 7.69   | 3.3x10 <sup>-15</sup> | 6     | 80,993  | 19,379,549 | 19,460,541 | 6     | 19,379,549 | 19,460,541 | 80,993  |
| TM6SF2       | rs188247550 | 19 | 19,396,616 | T | C | 1.95   | 1.95   | 5.2x10 <sup>-6</sup>  | 1,571 | 989,557 | 18,898,077 | 19,887,633 | 646   | 18,897,440 | 19,888,375 | 990,936 |
| PEPD         | rs10406327  | 19 | 33,890,838 | C | G | 52.3   | 47.7   | 3.8x10 <sup>-8</sup>  | 117   | 238,226 | 33,786,208 | 34,024,433 | 93    | 33,792,631 | 34,015,935 | 223,305 |
| TOMM40/APOE  | rs745903616 | 19 | 44,938,870 | A | G | 0.130  | 0.130  | 8.3x10 <sup>-6</sup>  | N/A   | N/A     | N/A        | N/A        | N/A   | N/A        | N/A        | N/A     |
| TOMM40/APOE  | rs4411941   | 19 | 45,411,941 | T | C | 84.6   | 15.4   | 2.6x10 <sup>-18</sup> | 4     | 30,693  | 45,392,254 | 45,422,946 | 2     | 45,392,254 | 45,411,941 | 19,688  |
| GIPR         | rs10406431  | 19 | 46,157,019 | A | G | 56.3   | 43.8   | 9.6x10 <sup>-14</sup> | 8     | 9,711   | 46,147,527 | 46,157,237 | 7     | 46,147,527 | 46,157,237 | 9,711   |
| GIPR         | rs2238689   | 19 | 46,178,661 | C | T | 41.8   | 41.8   | 5.4x10 <sup>-9</sup>  | 28    | 20,369  | 46,158,293 | 46,178,661 | 30    | 46,149,618 | 46,178,661 | 29,044  |
| GIPR         | rs533172266 | 19 | 46,351,837 | T | C | 0.0600 | 0.0600 | 3.7x10 <sup>-6</sup>  | N/A   | N/A     | N/A        | N/A        | N/A   | N/A        | N/A        | N/A     |
| ZC3H4        | rs3810291   | 19 | 47,569,003 | A | G | 67.3   | 32.7   | 8.9x10 <sup>-12</sup> | 31    | 56,674  | 47,564,643 | 47,621,316 | 29    | 47,564,968 | 47,621,316 | 56,349  |
| NKX2.2       | rs13041756  | 20 | 21,466,795 | C | T | 10.7   | 10.7   | 1.4x10 <sup>-8</sup>  | 19    | 73,584  | 21,451,139 | 21,524,722 | 22    | 21,451,139 | 21,524,722 | 73,584  |
| RALY         | rs2268078   | 20 | 32,596,704 | A | G | 65.7   | 34.3   | 2.3x10 <sup>-10</sup> | 116   | 348,108 | 32,381,337 | 32,729,444 | 105   | 32,514,092 | 32,727,430 | 213,339 |
| HNF4A        | rs76811102  | 20 | 42,905,415 | T | C | 4.24   | 4.24   | 1.1x10 <sup>-7</sup>  | 135   | 839,354 | 42,552,496 | 43,391,849 | 322   | 42,552,496 | 43,391,849 | 839,354 |
| HNF4A        | rs4810426   | 20 | 43,001,721 | T | C | 10.6   | 10.6   | 3.1x10 <sup>-17</sup> | 5     | 8,311   | 42,994,812 | 43,003,122 | 5     | 42,994,812 | 43,003,122 | 8,311   |
| HNF4A        | rs191830490 | 20 | 43,023,355 | G | A | 99.4   | 0.590  | 2.2x10 <sup>-6</sup>  | 1,779 | 980,737 | 42,542,425 | 43,523,161 | 31    | 42,552,496 | 43,419,867 | 867,372 |
| HNF4A        | rs1800961   | 20 | 43,042,364 | T | C | 3.53   | 3.53   | 2.3x10 <sup>-22</sup> | 1     | 1       | 43,042,364 | 43,042,364 | 1     | 43,042,364 | 43,042,364 | 1       |
| HNF4A        | rs11696357  | 20 | 43,233,649 | A | G | 93.4   | 6.60   | 9.9x10 <sup>-6</sup>  | 1,995 | 807,927 | 42,733,946 | 43,541,872 | 1,572 | 42,733,946 | 43,541,872 | 807,927 |
| EYA2         | rs560716466 | 20 | 45,317,678 | A | G | 0.310  | 0.310  | 9.8x10 <sup>-6</sup>  | 2,135 | 718,554 | 45,099,069 | 45,817,622 | 558   | 45,101,445 | 45,816,733 | 715,289 |
| EYA2         | rs6063048   | 20 | 45,598,564 | G | A | 72.5   | 27.5   | 2.2x10 <sup>-11</sup> | 16    | 25,077  | 45,581,777 | 45,606,853 | 16    | 45,557,469 | 45,606,853 | 49,385  |
| CEBPB        | rs11699802  | 20 | 48,832,135 | C | T | 53.6   | 46.4   | 1.8x10 <sup>-11</sup> | 11    | 9,093   | 48,826,880 | 48,835,972 | 12    | 48,808,011 | 48,835,972 | 27,962  |
| TSHZ2        | rs34454109  | 20 | 51,223,594 | A | T | 77.1   | 22.9   | 7.1x10 <sup>-9</sup>  | 267   | 436,047 | 50,828,285 | 51,264,331 | 249   | 50,828,285 | 51,620,301 | 792,017 |
| GNAS         | rs6070625   | 20 | 57,394,628 | G | C | 51.7   | 48.3   | 5.3x10 <sup>-14</sup> | 19    | 31,433  | 57,386,639 | 57,418,071 | 19    | 57,386,639 | 57,418,071 | 31,433  |
| GNAS         | rs862016    | 20 | 57,551,099 | G | A | 7.83   | 7.83   | 1.1x10 <sup>-7</sup>  | 20    | 29,678  | 57,550,273 | 57,579,950 | 23    | 57,236,717 | 57,579,950 | 343,234 |
| ZBTB46       | rs6011155   | 20 | 62,450,664 | T | C | 63.0   | 37.0   | 6.3x10 <sup>-6</sup>  | 1,618 | 724,304 | 62,193,402 | 62,917,705 | 972   | 62,194,128 | 62,917,047 | 722,920 |
| TCEA2        | rs59944054  | 20 | 62,693,175 | A | G | 23.8   | 23.8   | 1.5x10 <sup>-8</sup>  | 58    | 494,479 | 62,267,221 | 62,761,699 | 45    | 62,296,306 | 62,737,568 | 441,263 |
| MTRMR3/ASCC2 | rs6518681   | 22 | 30,609,554 | G | A | 91.4   | 8.64   | 1.1x10 <sup>-12</sup> | 143   | 499,653 | 30,138,232 | 30,637,884 | 141   | 30,135,928 | 30,637,884 | 501,957 |
| YWHAH        | rs117001013 | 22 | 32,348,841 | C | T | 91.2   | 8.83   | 1.7x10 <sup>-8</sup>  | 315   | 215,643 | 32,344,403 | 32,560,045 | 299   | 32,344,403 | 32,555,730 | 211,328 |
| EP300        | rs5758223   | 22 | 41,489,920 | A | G | 71.7   | 28.3   | 3.8x10 <sup>-8</sup>  | 138   | 669,493 | 41,066,598 | 41,736,090 | 126   | 41,262,852 | 41,864,190 | 601,339 |
| PNPLA3       | rs738408    | 22 | 44,324,730 | T | C | 22.6   | 22.6   | 1.4x10 <sup>-10</sup> | 52    | 70,725  | 44,324,727 | 44,395,451 | 29    | 44,324,727 | 44,395,451 | 70,725  |
| PIM3         | rs1801645   | 22 | 50,356,850 | C | T | 27.5   | 27.5   | 1.5x10 <sup>-8</sup>  | 50    | 109,631 | 50,351,977 | 50,461,607 | 48    | 50,351,977 | 50,460,687 | 108,711 |
| PIM3         | rs112915006 | 22 | 50,604,696 | G | A | 5.12   | 5.12   | 9.8x10 <sup>-7</sup>  | 1,140 | 748,200 | 50,107,943 | 50,856,142 | 862   | 50,107,943 | 50,843,852 | 735,910 |

RAF: risk allele frequency; MAF: minor allele frequency.

**Supplementary Table 6 | Summary of comparison of HRC-based and 1000G-based 99% credible sets.**

| Nearest gene  | Index variant | 1000-G based 99% genetic credible set |               |                     |                    | HRC-based 99% functional credible set |               |                     |                    | Difference in interval (HRC-based - 1000G-based) | Difference in SNPs (HRC-based - 1000G-based) |
|---------------|---------------|---------------------------------------|---------------|---------------------|--------------------|---------------------------------------|---------------|---------------------|--------------------|--------------------------------------------------|----------------------------------------------|
|               |               | SNPs                                  | Interval (bp) | Interval start (bp) | Interval stop (bp) | SNPs                                  | Interval (bp) | Interval start (bp) | Interval stop (bp) |                                                  |                                              |
| MACF1         | rs3768321     | 251                                   | 536,277       | 39,551,488          | 40,087,764         | 72                                    | 441,918       | 39,618,556          | 40,060,473         | -94,359                                          | -179                                         |
| FAF1          | rs58432198    | 1,903                                 | 970,055       | 50,809,304          | 51,779,358         | 233                                   | 588,366       | 50,920,161          | 51,508,526         | -381,689                                         | -1,670                                       |
| NOTCH2        | rs1493694     | 73                                    | 134,811       | 120,436,751         | 120,571,561        | 48                                    | 116,417       | 120,437,718         | 120,554,134        | -18,394                                          | -25                                          |
| PROX1         | rs340874      | 21                                    | 18,287        | 214,145,389         | 214,163,675        | 1                                     | 1             | 214,159,256         | 214,159,256        | -18,286                                          | -20                                          |
| THADA         | rs80147536    | 162                                   | 295,211       | 43,469,615          | 43,764,825         | 155                                   | 236,769       | 43,528,057          | 43,764,825         | -58,442                                          | -7                                           |
| BCL11A        | rs243024      | 26                                    | 60,316        | 60,533,913          | 60,594,228         | 8                                     | 7,084         | 60,579,624          | 60,586,707         | -53,232                                          | -18                                          |
| RBMS1         | rs3772071     | 88                                    | 256,652       | 161,087,411         | 161,344,062        | 30                                    | 246,462       | 161,087,411         | 161,333,872        | -10,190                                          | -58                                          |
| IRS1          | rs2972144     | 85                                    | 134,270       | 227,047,414         | 227,181,683        | 30                                    | 34,288        | 227,083,411         | 227,117,698        | -99,982                                          | -55                                          |
| PPARG         | rs11709077    | 42                                    | 131,494       | 12,265,462          | 12,396,955         | 11                                    | 67,131        | 12,329,783          | 12,396,913         | -64,363                                          | -31                                          |
| UBE2E2        | rs35352848    | 65                                    | 380,819       | 23,187,407          | 23,568,225         | 5                                     | 2,291         | 23,454,790          | 23,457,080         | -378,528                                         | -60                                          |
| ADAMTS9       | rs9860730     | 14                                    | 30,677        | 64,699,445          | 64,730,121         | 23                                    | 29,697        | 64,700,425          | 64,730,121         | -980                                             | 9                                            |
| ADCY5         | rs11708067    | 11                                    | 39,118        | 123,054,770         | 123,093,887        | 4                                     | 4,649         | 123,065,778         | 123,070,426        | -34,469                                          | -7                                           |
| IGF2BP2       | rs6780171     | 30                                    | 32,656        | 185,497,635         | 185,530,290        | 41                                    | 39,163        | 185,495,320         | 185,534,482        | 6,507                                            | 11                                           |
| STGGAL1       | rs3887925     | 247                                   | 75,872        | 186,606,741         | 186,682,612        | 2                                     | 8,494         | 186,665,645         | 186,674,138        | -67,378                                          | -245                                         |
| LPP           | rs4686471     | 324                                   | 79,292        | 187,677,977         | 187,757,268        | 3                                     | 1,320         | 187,740,523         | 187,741,842        | -77,972                                          | -321                                         |
| MAEA          | rs56337234    | 2,719                                 | 1,754,840     | 510,985             | 2,265,824          | 5                                     | 2,920         | 1,781,686           | 1,784,605          | -1,751,920                                       | -2,714                                       |
| WFS1          | rs10937721    | 87                                    | 57,401        | 6,263,996           | 6,321,396          | 108                                   | 41,845        | 6,280,449           | 6,322,293          | -15,556                                          | 21                                           |
| TMEM154       | rs7669833     | 523                                   | 279,179       | 153,241,587         | 153,520,765        | 36                                    | 24,961        | 153,495,515         | 153,520,475        | -254,218                                         | -487                                         |
| ACSL1         | rs58730668    | 67                                    | 48,312        | 185,684,247         | 185,732,558        | 46                                    | 17,143        | 185,713,608         | 185,730,750        | -31,169                                          | -21                                          |
| ARL15         | rs702634      | 233                                   | 151,621       | 53,243,352          | 53,394,972         | 3                                     | 4,882         | 53,271,420          | 53,276,301         | -146,739                                         | -230                                         |
| ANKRD55       | rs465002      | 20                                    | 21,450        | 55,794,632          | 55,816,081         | 13                                    | 11,122        | 55,799,184          | 55,810,305         | -10,328                                          | -7                                           |
| ANKRD55       | rs9687832     | 10                                    | 5,520         | 55,856,375          | 55,861,894         | 8                                     | 5,520         | 55,856,375          | 55,861,894         | 0                                                | -2                                           |
| ZBED3         | rs4457053     | 39                                    | 49,120        | 76,424,949          | 76,474,068         | 5                                     | 10,056        | 76,424,949          | 76,435,004         | -39,064                                          | -34                                          |
| PAM           | rs115505614   | 2,842                                 | 1,202,395     | 101,624,383         | 102,826,777        | 8                                     | 285,050       | 102,301,358         | 102,586,407        | -917,345                                         | -2,834                                       |
| RREB1         | rs9379084     | 315                                   | 160,806       | 7,166,829           | 7,327,634          | 1                                     | 1             | 7,231,843           | 7,231,843          | -160,805                                         | -314                                         |
| CDKAL1        | rs7756992     | 6                                     | 30,073        | 20,673,880          | 20,703,952         | 6                                     | 13,117        | 20,673,880          | 20,686,996         | -16,956                                          | 0                                            |
| CENPW         | rs11759026    | 125                                   | 412,763       | 126,657,472         | 127,070,234        | 2                                     | 172,416       | 126,792,095         | 126,964,510        | -240,347                                         | -123                                         |
| SLC35D3       | rs9494624     | 40                                    | 18,391        | 137,287,076         | 137,305,466        | 34                                    | 17,765        | 137,287,702         | 137,305,466        | -626                                             | -6                                           |
| DGKB          | rs17168486    | 7                                     | 61,806        | 14,862,102          | 14,923,907         | 6                                     | 62,871        | 14,859,137          | 14,922,007         | 1,065                                            | -1                                           |
| DGKB          | rs10228066    | 59                                    | 18,333        | 15,047,280          | 15,065,612         | 17                                    | 2,774         | 15,062,694          | 15,065,467         | -15,559                                          | -42                                          |
| JAZF1         | rs1708302     | 11                                    | 27,366        | 28,172,732          | 28,200,097         | 6                                     | 7,818         | 28,192,280          | 28,200,097         | -19,548                                          | -5                                           |
| GCK           | rs878521      | 103                                   | 44,108        | 44,222,077          | 44,266,184         | 2                                     | 23,866        | 44,231,778          | 44,255,643         | -20,242                                          | -101                                         |
| KLF14         | rs1562396     | 71                                    | 45,257        | 130,422,934         | 130,468,190        | 26                                    | 40,188        | 130,427,388         | 130,467,575        | -5,069                                           | -45                                          |
| AOC1          | rs62492368    | 220                                   | 168,226       | 156,920,930         | 157,089,155        | 42                                    | 37,872        | 150,504,840         | 150,542,711        | -130,354                                         | -178                                         |
| ANK1          | rs13262861    | 44                                    | 111,162       | 41,426,157          | 41,537,318         | 9                                     | 16,323        | 41,508,577          | 41,524,899         | -94,839                                          | -35                                          |
| TP53INP1      | rs10097617    | 988                                   | 384,925       | 95,734,719          | 96,119,643         | 14                                    | 56,937        | 95,911,477          | 95,968,413         | -327,988                                         | -974                                         |
| SLC30A8       | rs3802177     | 6                                     | 33,133        | 118,184,783         | 118,217,915        | 5                                     | 19,238        | 118,184,783         | 118,204,020        | -13,895                                          | -1                                           |
| GLIS3         | rs10974438    | 359                                   | 68,430        | 4,243,162           | 4,311,591          | 2                                     | 6,662         | 4,291,928           | 4,298,589          | -61,768                                          | -357                                         |
| CDKN2A/B      | rs1412830     | 105                                   | 128,333       | 21,997,015          | 22,125,347         | 66                                    | 155,129       | 21,966,221          | 22,121,349         | 26,796                                           | -39                                          |
| CDKN2A/B      | rs10811660    | 6                                     | 1,556         | 22,132,698          | 22,134,253         | 5                                     | 1,556         | 22,132,698          | 22,134,253         | 0                                                | -1                                           |
| CDKN2A/B      | rs10757283    | 5                                     | 1,007         | 22,133,645          | 22,134,651         | 5                                     | 1,007         | 22,133,645          | 22,134,651         | 0                                                | 0                                            |
| TLE4          | rs17791513    | 192                                   | 130,813       | 81,881,363          | 82,012,175         | 22                                    | 60,142        | 81,891,987          | 81,952,128         | -70,671                                          | -170                                         |
| TLE1          | rs2796441     | 8                                     | 18,348        | 84,293,453          | 84,311,800         | 2                                     | 2,853         | 84,308,948          | 84,311,800         | -15,495                                          | -6                                           |
| ABO           | rs505922      | 40                                    | 17,936        | 136,137,065         | 136,155,000        | 17                                    | 15,736        | 136,139,265         | 136,155,000        | -2,200                                           | -23                                          |
| CDC123/CAMK1D | rs11257655    | 15                                    | 27,296        | 12,302,357          | 12,329,652         | 1                                     | 1             | 12,307,894          | 12,307,894         | -27,295                                          | -14                                          |
| ZMIZ1         | rs703972      | 15                                    | 13,373        | 80,941,417          | 80,954,789         | 10                                    | 10,832        | 80,942,620          | 80,953,451         | -2,541                                           | -5                                           |
| HHEX/IDE      | rs10882101    | 24                                    | 56,253        | 94,429,511          | 94,485,763         | 10                                    | 21,703        | 94,444,793          | 94,466,495         | -34,550                                          | -14                                          |
| TCF7L2        | rs7903146     | 3                                     | 4,279         | 114,754,071         | 114,758,349        | 3                                     | 4,279         | 114,517,569         | 114,995,846        | 0                                                | 0                                            |
| PLEKHA1       | rs2280141     | 25                                    | 59,193        | 124,139,393         | 124,198,585        | 25                                    | 59,193        | 2,193,597           | 2,197,286          | 0                                                | 0                                            |
| KCNQ1         | rs231361      | 3                                     | 197           | 2,858,440           | 2,858,636          | 1                                     | 1             | 2,840,424           | 2,857,897          | -196                                             | -2                                           |
| KCNJ11        | rs5213        | 22                                    | 53,506        | 17,368,381          | 17,421,886         | 6                                     | 10,074        | 17,408,404          | 17,418,477         | -43,432                                          | -16                                          |
| HSD17B12      | rs1061810     | 74                                    | 126,013       | 43,752,522          | 43,878,534         | 67                                    | 125,964       | 43,752,522          | 43,878,485         | -49                                              | -7                                           |
| MAP3K11       | rs1783541     | 83                                    | 314,376       | 65,217,626          | 65,532,001         | 12                                    | 79,725        | 65,257,527          | 65,337,251         | -234,651                                         | -71                                          |
| CENTD2/ARAP1  | rs77464186    | 26                                    | 431,950       | 72,419,514          | 72,851,463         | 9                                     | 33,857        | 72,429,579          | 72,463,435         | -398,093                                         | -17                                          |
| MTNR1B        | rs10830963    | 56                                    | 57,592        | 92,667,730          | 92,725,321         | 1                                     | 1             | 92,708,710          | 92,708,710         | -57,591                                          | -55                                          |
| CCND2         | rs11063028    | 20                                    | 28,171        | 4,288,001           | 4,316,171          | 13                                    | 12,809        | 4,288,001           | 4,300,809          | -15,362                                          | -7                                           |
| CCND2         | rs4238013     | 3                                     | 13,181        | 4,362,909           | 4,376,089          | 3                                     | 13,181        | 4,362,909           | 4,376,089          | 0                                                | 0                                            |
| CCND2         | rs3217792     | 102                                   | 200,521       | 4,158,184           | 4,358,704          | 1                                     | 1             | 4,384,696           | 4,384,696          | -200,520                                         | -101                                         |
| KLHDC5        | rs10842994    | 61                                    | 46,006        | 27,919,145          | 27,965,150         | 26                                    | 27,680        | 27,937,471          | 27,965,150         | -18,326                                          | -35                                          |
| HMG2          | rs2258238     | 107                                   | 217,850       | 66,165,471          | 66,383,320         | 47                                    | 82,788        | 66,178,137          | 66,260,924         | -135,062                                         | -60                                          |
| TSPAN8/LGR5   | rs1796330     | 536                                   | 252,482       | 71,413,705          | 71,666,186         | 119                                   | 131,397       | 71,408,690          | 71,540,086         | -121,085                                         | -417                                         |
| HNF1A         | rs56348580    | 16                                    | 61,764        | 121,410,168         | 121,471,931        | 5                                     | 27,423        | 121,429,194         | 121,456,616        | -34,341                                          | -11                                          |
| MPHOSPH9      | rs4148856     | 550                                   | 504,880       | 123,408,818         | 123,913,697        | 208                                   | 612,745       | 123,296,204         | 123,908,948        | 107,865                                          | -342                                         |
| SPRY2         | rs1359790     | 9                                     | 13,340        | 80,705,315          | 80,718,654         | 10                                    | 11,842        | 80,705,315          | 80,717,156         | -1,498                                           | 1                                            |

|                    |             |       |         |            |            |     |         |            |            |          |        |
|--------------------|-------------|-------|---------|------------|------------|-----|---------|------------|------------|----------|--------|
| <i>NRXN3</i>       | rs17836088  | 537   | 387,539 | 79,689,186 | 80,076,724 | 16  | 54,707  | 79,890,456 | 79,945,162 | -332,832 | -521   |
| <i>C2C4A/B</i>     | rs8037894   | 46    | 263,439 | 62,117,975 | 62,381,413 | 15  | 15,939  | 62,383,155 | 62,399,093 | -247,500 | -31    |
| <i>HMG20A</i>      | rs1005752   | 49    | 346,309 | 77,486,008 | 77,832,316 | 24  | 121,044 | 77,711,719 | 77,832,762 | -225,265 | -25    |
| <i>PRC1</i>        | rs12910825  | 75    | 124,709 | 91,444,573 | 91,569,281 | 25  | 30,176  | 91,506,452 | 91,536,627 | -94,533  | -50    |
| <i>FTO</i>         | rs1421085   | 64    | 43,402  | 53,799,507 | 53,842,908 | 6   | 8,170   | 53,800,954 | 53,809,123 | -35,232  | -58    |
| <i>BCAR1</i>       | rs72802342  | 13    | 51,613  | 75,234,872 | 75,286,484 | 9   | 17,456  | 75,234,872 | 75,252,327 | -34,157  | -4     |
| <i>CMIP</i>        | rs2925979   | 3     | 10,517  | 81,524,274 | 81,534,790 | 2   | 1,002   | 81,533,789 | 81,534,790 | -9,515   | -1     |
| <i>ZZEF1</i>       | rs1377807   | 307   | 406,766 | 3,880,546  | 4,287,311  | 66  | 281,716 | 3,884,026  | 4,165,741  | -125,050 | -241   |
| <i>GLP2R</i>       | rs7222481   | 87    | 41,165  | 9,765,514  | 9,806,678  | 79  | 40,195  | 9,766,484  | 9,806,678  | -970     | -8     |
| <i>HNF1B</i>       | rs10908278  | 13    | 6,347   | 36,097,775 | 36,104,121 | 4   | 3,726   | 36,099,840 | 36,103,565 | -2,621   | -9     |
| <i>TTL6</i>        | rs35895680  | 172   | 164,324 | 46,883,545 | 47,047,868 | 118 | 177,089 | 46,917,953 | 47,095,041 | 12,765   | -54    |
| <i>LAMA1</i>       | rs7240767   | 28    | 20,514  | 7,062,395  | 7,082,908  | 24  | 19,825  | 7,063,196  | 7,083,020  | -689     | -4     |
| <i>MC4R</i>        | rs523288    | 168   | 183,018 | 57,730,948 | 57,913,965 | 74  | 181,548 | 57,732,418 | 57,913,965 | -1,470   | -94    |
| <i>TM6SF2</i>      | rs8107974   | 1,358 | 540,002 | 19,260,466 | 19,800,467 | 6   | 80,993  | 19,379,549 | 19,460,541 | -459,009 | -1,352 |
| <i>TOMM40/APOE</i> | rs745903616 | 4     | 11,006  | 45,411,941 | 45,422,946 | 4   | 30,693  | 45,392,254 | 45,422,946 | 19,687   | 0      |
| <i>GIPR</i>        | rs10406431  | 30    | 30,276  | 46,148,386 | 46,178,661 | 8   | 9,711   | 46,147,527 | 46,157,237 | -20,565  | -22    |
| <i>HNF4A</i>       | rs4810426   | 136   | 169,470 | 42,847,479 | 43,016,948 | 5   | 8,311   | 42,994,812 | 43,003,122 | -161,159 | -131   |
| <i>HNF4A</i>       | rs1800961   | 1     | 1       | 43,042,364 | 43,042,364 | 1   | 1       | 43,042,364 | 43,042,364 | 0        | 0      |
| <i>MTMR3/ASCC2</i> | rs6518681   | 153   | 473,627 | 30,135,928 | 30,609,554 | 143 | 499,653 | 30,138,232 | 30,637,884 | 26,026   | -10    |

Supplementary Table 7 | Coding variants with high PPAs.

| Nearest gene       | Index variant | Chromosome | Position<br>(Build 37 bp) | Risk allele | Other allele | RAF (%) | MAF (%) | Posterior probability    |                             | Missense variant with posterior probability >50% |                    |
|--------------------|---------------|------------|---------------------------|-------------|--------------|---------|---------|--------------------------|-----------------------------|--------------------------------------------------|--------------------|
|                    |               |            |                           |             |              |         |         | 99% genetic credible set | 99% functional credible set | Gene                                             | Variant annotation |
| <i>PATJ</i>        | rs12140153    | 1          | 62579891                  | G           | T            | 90.5    | 9.49    | 0.996                    | 1.000                       | <i>PATJ</i>                                      | p.Gly157Val        |
| <i>GCKR</i>        | rs1260326     | 2          | 27730940                  | C           | T            | 60.7    | 39.3    | 0.897                    | 0.899                       | <i>GCKR</i>                                      | p.Pro446Leu        |
| <i>SCD5</i>        | rs12642790    | 4          | 83578271                  | A           | G            | 33.8    | 33.8    | 0.147                    | 0.673                       | <i>SCD5</i>                                      | p.Glu197Gln        |
| <i>ANKH</i>        | rs78408340    | 5          | 14751305                  | C           | T            | 99.4    | 0.620   | 0.770                    | 0.963                       | <i>ANKH</i>                                      | p.Arg187Gln        |
| <i>ANKH</i>        | rs78408340    | 5          | 14751305                  | C           | T            | 99.4    | 0.620   | 1.000                    | 1.000                       | <i>PAM</i>                                       | p.Ser539Trp        |
| <i>MRPS30</i>      | rs62368490    | 5          | 44534364                  | T           | C            | 3.13    | 3.13    | 0.010                    | 0.522                       | <i>MRPS30</i>                                    | p.Glu128Gln        |
| <i>POC5</i>        | rs2307111     | 5          | 75003678                  | T           | C            | 60.5    | 39.5    | 0.628                    | 0.873                       | <i>POC5</i>                                      | p.His36Arg         |
| <i>RREB1</i>       | rs9379084     | 6          | 7231843                   | G           | A            | 88.7    | 11.3    | 0.993                    | 0.998                       | <i>RREB1</i>                                     | p.Asp1171Asn       |
| <i>SLC30A8</i>     | rs3802177     | 8          | 118185025                 | G           | A            | 68.5    | 31.5    | 0.351                    | 0.961                       | <i>SLC30A8</i>                                   | p.Arg276Trp        |
| <i>NEUROG3</i>     | rs41277236    | 10         | 71332301                  | T           | C            | 4.31    | 4.31    | 0.737                    | 0.987                       | <i>NEUROG3</i>                                   | p.Gly167Arg        |
| <i>QSER1</i>       | rs145678014   | 11         | 32927778                  | G           | T            | 95.7    | 4.33    | 0.211                    | 0.846                       | <i>QSER1</i>                                     | p.Arg1101Cys       |
| <i>CDKN1B</i>      | rs2066827     | 12         | 12871099                  | G           | T            | 23.5    | 23.5    | 0.984                    | 0.999                       | <i>CDKN1B</i>                                    | p.Val109Gly        |
| <i>WSCD2</i>       | rs1426371     | 12         | 108629780                 | G           | A            | 73.9    | 26.1    | 0.440                    | 0.753                       | <i>WSCD2</i>                                     | p.Thr113Ile        |
| <i>HNF1A</i>       | rs1800574     | 12         | 121416864                 | T           | C            | 2.96    | 2.96    | 0.985                    | 0.996                       | <i>HNF1A</i>                                     | p.Ala146Val        |
| <i>HNF1A</i>       | rs56348580    | 12         | 121432117                 | G           | C            | 68.9    | 31.1    | 0.474                    | 0.906                       | <i>HNF1A</i>                                     | p.Gly226Ala        |
| <i>IRS2</i>        | rs4771648     | 13         | 110431626                 | G           | A            | 66.9    | 33.2    | 0.173                    | 0.645                       | <i>IRS2</i>                                      | p.Gly1057Asp       |
| <i>FAM57B</i>      | rs199795270   | 16         | 30419384                  | C           | G            | 0.650   | 0.650   | 0.661                    | 0.993                       | <i>ZNF771</i>                                    | p.Glu4Gln          |
| <i>TOMM40/APOE</i> | rs429358      | 19         | 45411941                  | T           | C            | 84.6    | 15.4    | 0.896                    | 0.973                       | <i>APOE</i>                                      | p.Cys130Arg        |
| <i>HNF4A</i>       | rs1800961     | 20         | 43042364                  | T           | C            | 3.53    | 3.53    | 1.000                    | 1.000                       | <i>HNF4A</i>                                     | p.Thr139Ile        |

RAF: risk allele frequency; MAF: minor allele frequency.

Supplementary Table 8 | Non-coding credible set variants with >80% posterior probability of association.

| Locus         | Index variant | Variant with highest PPA in 99% credible set | Chr | Pos         | MAF (%) | PPA     |            | Chromatin states               |                 |                 |                 |                 |
|---------------|---------------|----------------------------------------------|-----|-------------|---------|---------|------------|--------------------------------|-----------------|-----------------|-----------------|-----------------|
|               |               |                                              |     |             |         | Genetic | Functional | Islets                         | Islets          | Adipose         | Skeletal Muscle | Liver           |
| PROX1         | rs340874      | rs340874                                     | 1   | 214,159,256 | 44.5    | 1.000   | 1.000      | Active promoter                | Active promoter |                 |                 | Active promoter |
| ABC10         | rs348330      | rs348330                                     | 1   | 229,672,955 | 36.1    | 1.000   | 1.000      | Strong enhancer                | Active enhancer |                 |                 |                 |
| ANKH          | rs76549217    | rs76549217                                   | 5   | 14,768,766  | 3.0     | 1.000   | 1.000      | Strong enhancer                | Active enhancer |                 | Active enhancer |                 |
| CDC123/CAMK1D | rs11257655    | rs11257655                                   | 10  | 12,307,894  | 21.8    | 1.000   | 1.000      | Strong enhancer                | Active enhancer | Weak enhancer   |                 | Active enhancer |
| KCNQ1         | rs231361      | rs231361                                     | 11  | 2,691,500   | 25.6    | 1.000   | 1.000      | Strong enhancer (No ATAC/Meth) |                 |                 |                 |                 |
| MTNR1B        | rs10830963    | rs10830963                                   | 11  | 92,708,710  | 27.7    | 1.000   | 1.000      | Strong enhancer (No ATAC/Meth) |                 |                 |                 |                 |
| CCND2         | rs76895963    | rs76895963                                   | 12  | 4,384,844   | 2.0     | 1.000   | 1.000      | Active promoter                | Active promoter |                 |                 |                 |
| BCL2A         | rs12454712    | rs12454712                                   | 18  | 60,845,884  | 38.6    | 1.000   | 1.000      | Weak enhancer (Methylation)    |                 |                 |                 |                 |
| CASC11        | rs17772814    | rs17772814                                   | 8   | 128,711,742 | 8.5     | 0.999   | 1.000      | Weak enhancer (Methylation)    |                 |                 |                 |                 |
| KCNQ1         | rs2237895     | rs2237895                                    | 11  | 2,857,194   | 42.6    | 0.999   | 0.998      | Strong enhancer (No ATAC/Meth) |                 |                 |                 |                 |
| CCND2         | rs3217792     | rs3217792                                    | 12  | 4,384,696   | 8.7     | 0.999   | 0.998      | Active promoter                | Active promoter | Active promoter |                 |                 |
| WDR72         | rs528350911   | rs528350911                                  | 15  | 53,747,228  | 0.7     | 0.995   | 0.994      |                                |                 |                 |                 | Active enhancer |
| FAM49A        | rs11680058    | rs11680058                                   | 2   | 16,574,669  | 13.7    | 0.994   | 1.000      | Strong enhancer                | Active enhancer |                 |                 |                 |
| LRFN2         | rs34298980    | rs34298980                                   | 6   | 40,409,243  | 49.7    | 0.991   | 0.999      | Strong enhancer                |                 |                 |                 |                 |
| TCF7L2        | rs140242150   | rs140242150                                  | 10  | 114702962   | 0.5     | 0.987   | 0.985      |                                |                 |                 |                 |                 |
| CCND2         | rs3217860     | rs3217860                                    | 12  | 4399050     | 25.8    | 0.987   | 0.990      | Gene enhancer                  |                 | Genic enhancer  |                 |                 |
| GLI2          | rs11688682    | rs11688682                                   | 2   | 121347612   | 27.2    | 0.986   | 0.987      |                                |                 | Active enhancer |                 |                 |
| ST6GAL1       | rs3887925     | rs3887925                                    | 3   | 186665645   | 45.3    | 0.985   | 0.993      | Weak enhancer (No ATAC/Meth.)  | Active enhancer | Active enhancer | Weak enhancer   |                 |
| CAMK2B        | rs878521      | rs878521                                     | 7   | 44255643    | 24.5    | 0.984   | 0.997      | Strong enhancer                |                 |                 | Active enhancer |                 |
| HNF1B         | rs10962       | rs10962                                      | 17  | 36046451    | 22.6    | 0.984   | 0.981      |                                |                 |                 |                 |                 |
| ANK1          | rs13262861    | rs13262861                                   | 8   | 41508577    | 17.1    | 0.973   | 0.988      | Active promoter                | Active enhancer |                 |                 |                 |
| GLIS3         | rs10974438    | rs10974438                                   | 9   | 4291928     | 35.7    | 0.973   | 0.885      | Strong enhancer (No ATAC/Meth) | Active enhancer |                 |                 |                 |
| PTGFRN        | rs1127215     | rs1127215                                    | 1   | 117532790   | 41.6    | 0.972   | 0.874      |                                |                 | Active enhancer | Weak enhancer   |                 |
| HNF4A         | rs76811102    | rs76811102                                   | 20  | 42905415    | 4.2     | 0.965   | 0.943      |                                |                 |                 |                 |                 |
| CRHR2         | rs917195      | rs917195                                     | 7   | 30728452    | 23.0    | 0.962   | 0.987      | Weak enhancer                  |                 |                 |                 |                 |
| CMIP          | rs2925979     | rs2925979                                    | 16  | 81534790    | 30.0    | 0.960   | 0.931      | Weak enhancer (No ATAC/Meth.)  | Weak enhancer   | Active enhancer | Active enhancer |                 |
| CDKN2B        | rs76011118    | rs76011118                                   | 9   | 22133773    | 3.4     | 0.949   | 0.952      | Weak enhancer (No ATAC/Meth.)  |                 |                 |                 |                 |
| TSC22D2       | rs62271373    | rs62271373                                   | 3   | 150066540   | 5.5     | 0.948   | 0.846      |                                |                 | Active enhancer | Weak enhancer   |                 |
| HTT           | rs362307      | rs362307                                     | 4   | 3241845     | 7.7     | 0.946   | 0.985      |                                | Active enhancer | Genic enhancer  | Genic enhancer  |                 |
| INS_IGF2      | rs555759341   | rs555759341                                  | 11  | 2151761     | 0.5     | 0.943   | 0.722      |                                |                 |                 |                 |                 |
| IGF2BP2       | rs150111048   | rs150111048                                  | 3   | 185514421   | 23.9    | 0.941   | 0.938      | Weak enhancer                  | Active enhancer |                 |                 |                 |
| CDKAL1        | rs7756992     | rs7756992                                    | 6   | 20679709    | 27.4    | 0.929   | 0.167      |                                |                 |                 |                 |                 |
| UBAP2         | rs12001437    | rs12001437                                   | 9   | 34074476    | 37.2    | 0.917   | 0.985      | Strong enhancer                | Active enhancer | Weak enhancer   | Weak enhancer   | Weak enhancer   |
| CLUAP1        | rs3751837     | rs3751837                                    | 16  | 3583173     | 22.0    | 0.903   | 0.940      |                                |                 |                 |                 |                 |
| KCNQ1         | rs2283164     | rs2283164                                    | 11  | 2579163     | 5.3     | 0.890   | 0.545      |                                |                 |                 |                 |                 |
| CPQ           | rs149364428   | rs149364428                                  | 8   | 97737741    | 1.0     | 0.867   | 0.673      |                                |                 |                 |                 |                 |
| CACNA2D3      | rs76263492    | rs76263492                                   | 3   | 54828827    | 4.5     | 0.861   | 0.852      |                                |                 |                 |                 |                 |
| NEUROG3       | rs177045      | rs177045                                     | 10  | 71321279    | 31.6    | 0.855   | 0.845      |                                |                 |                 |                 |                 |
| FAM63A        | rs145904381   | rs145904381                                  | 1   | 151017991   | 1.3     | 0.836   | 0.597      |                                |                 |                 |                 |                 |
| ANKH          | rs17250977    | rs17250977                                   | 5   | 14753745    | 3.8     | 0.835   | 0.836      | Gene enhancer                  |                 |                 | Active enhancer |                 |
| TLE1          | rs2796441     | rs2796441                                    | 9   | 84308948    | 40.8    | 0.824   | 0.946      | Weak enhancer (Methylation)    |                 | Weak enhancer   |                 |                 |
| KCNQ1         | rs2237897     | rs2237897                                    | 11  | 2858546     | 4.6     | 0.813   | 0.812      |                                | Active enhancer | Weak enhancer   | Weak enhancer   |                 |
| WDR11         | rs72631105    | rs72631105                                   | 10  | 122915345   | 19.4    | 0.806   | 0.879      | Weak enhancer (No ATAC/Meth.)  | Weak enhancer   |                 | Weak enhancer   |                 |
| TCF7L2        | rs7903146     | rs7903146                                    | 10  | 114758349   | 29.4    | 0.592   | 0.971      | Strong enhancer                | Active enhancer | Active enhancer |                 |                 |
| HNF4A         | rs191830490   | rs191830490                                  | 20  | 43023355    | 0.6     | 0.519   | 0.956      | Strong enhancer                | Active enhancer | Weak enhancer   |                 | Active promoter |
| VEGFA         | rs11967262    | rs11967262                                   | 6   | 43760327    | 48.6    | 0.634   | 0.950      | Strong enhancer                |                 | Active enhancer |                 |                 |
| ANKH          | rs6885132     | rs6885132                                    | 5   | 14768092    | 9.6     | 0.682   | 0.946      | Strong enhancer                | Active enhancer |                 | Active enhancer |                 |

|               |             |             |    |           |      |       |       |                 |                 |                 |                 |                 |
|---------------|-------------|-------------|----|-----------|------|-------|-------|-----------------|-----------------|-----------------|-----------------|-----------------|
| <i>RAI1</i>   | rs4925109   | rs4925109   | 17 | 17661802  | 31.6 | 0.562 | 0.908 | Strong enhancer | Active enhancer |                 | Weak enhancer   |                 |
| <i>RNF6</i>   | rs34584161  | rs34584161  | 13 | 26776999  | 24.0 | 0.672 | 0.898 | Strong enhancer | Active enhancer |                 | Weak enhancer   |                 |
| <i>DGKB</i>   | rs17168486  | rs17168486  | 7  | 14898282  | 18.1 | 0.577 | 0.898 | Weak promoter   |                 |                 |                 |                 |
| <i>ASCL2</i>  | rs80102379  | rs80102379  | 11 | 2634177   | 1.8  | 0.676 | 0.892 | Weak enhancer   |                 |                 |                 |                 |
| <i>EYA2</i>   | rs560716466 | rs560716466 | 20 | 45317678  | 0.3  | 0.396 | 0.890 | Active promoter |
| <i>DLEU1</i>  | rs963740    | rs963740    | 13 | 51096095  | 28.7 | 0.503 | 0.879 | Strong enhancer | Active enhancer | Weak enhancer   | Active enhancer | Active enhancer |
| <i>ADCY5</i>  | rs11708067  | rs11708067  | 3  | 123065778 | 22.8 | 0.789 | 0.871 | Weak enhancer   | Active enhancer |                 | Weak enhancer   |                 |
| <i>CDKN2B</i> | rs10757283  | rs10757283  | 9  | 22134172  | 43.0 | 0.498 | 0.844 | Weak enhancer   |                 |                 |                 |                 |
| <i>TBCE</i>   | rs291367    | rs291367    | 1  | 235690800 | 36.8 | 0.240 | 0.842 | Weak enhancer   |                 |                 |                 | Active enhancer |
| <i>ZBED3</i>  | rs4457053   | rs7732130   | 5  | 76435004  | 30.3 | 0.276 | 0.834 | Strong enhancer | Active enhancer | Active enhancer |                 |                 |
| <i>MACF1</i>  | rs3768321   | rs3768321   | 1  | 40035928  | 20.0 | 0.657 | 0.810 |                 |                 |                 |                 | Genic enhancer  |

PPA: posterior probability of association; MAF: minor allele frequency.

<sup>1</sup>Turner, M. et al. Integration of human pancreatic islet genomic data refines regulatory mechanisms at Type 2 Diabetes susceptibility loci. *bioRxiv* (2017).

<sup>2</sup>Varshney, A. et al. Genetic regulatory signatures underlying islet gene expression and type 2 diabetes. *Proc Natl Acad Sci U S A* 114, 2301-2306 (2017).

Supplementary Table 9 | TCF7L2 credible set variants.

| Signal     | Index variant | SNPs in 99% credible set (with PPA≥1%) |             | Variant     | Chr       | Pos       | Posterior probability of association |            | Chromatin state       |                       |                      |                              |                    | Transcription factor binding site <sup>3</sup> | RAF (%) | MAF (%) |
|------------|---------------|----------------------------------------|-------------|-------------|-----------|-----------|--------------------------------------|------------|-----------------------|-----------------------|----------------------|------------------------------|--------------------|------------------------------------------------|---------|---------|
|            |               | Genetic                                | Functional  |             |           |           | Genetic                              | Functional | Islets_1 <sup>1</sup> | Islets_2 <sup>2</sup> | Adipose <sup>2</sup> | Skeletal Muscle <sup>2</sup> | Liver <sup>2</sup> |                                                |         |         |
| Primary    | rs7903146     | 3 (3)                                  | 2 (2)       | rs7903146   | 10        | 114758349 | 0.592                                | 0.9705     | 5                     | 10                    | 10                   | 13                           | 13                 | FOXA2, MAFB, NKX6.1, NKX2.2                    | 29.4    | 29.4    |
|            |               |                                        |             | rs35198068  | 10        | 114754784 | 0.045                                | 0          | 12                    | 13                    | 9                    | 13                           | 14                 | 29.53                                          | 29.53   |         |
|            |               |                                        |             | rs34872471  | 10        | 114754071 | 0.363                                | 0.0262     | 12                    | 13                    | 10                   | 13                           | 14                 | 29.51                                          | 29.51   |         |
| Secondary  | rs536643418   | MAF<0.25%; not fine-mapped             |             | rs536643418 | 10        | 114699835 | -                                    | -          | 12                    | 16                    | 16                   | 16                           | 13                 |                                                | 0.52    | 0.52    |
|            | rs140242150   | 4 (1)                                  | 5 (1)       | rs140242150 | 10        | 114702962 | 0.987                                | 0.9854     | 12                    | 16                    | 16                   | 15                           | 13                 |                                                | 0.5     | 0.5     |
|            | rs7918400     | 4 (3)                                  | 5 (5)       | rs7918400   | 10        | 114703136 | 0.712                                | 0.5219     | 12                    | 16                    | 16                   | 15                           | 13                 |                                                | 52.39   | 47.61   |
|            |               |                                        |             | rs72826045  | 10        | 114702608 | 0.263                                | 0.1933     | 12                    | 16                    | 16                   | 15                           | 13                 |                                                | 52.37   | 47.63   |
|            |               |                                        |             | rs7094871   | 10        | 114712154 | 0.01                                 | 0.158      | 1                     | 6                     | 6                    | 6                            | 6                  |                                                | 54.04   | 45.96   |
|            |               |                                        |             | rs10885396  | 10        | 114711755 | 0.006                                | 0.0984     | 1                     | 6                     | 6                    | 6                            | 6                  | FOXA2                                          | 54.03   | 45.97   |
|            |               |                                        |             | rs7094463   | 10        | 114711983 | 0                                    | 0.023      | 1                     | 6                     | 6                    | 6                            | 6                  |                                                | 53.19   | 46.81   |
|            | rs184509201   | 9 (8)                                  | 8 (8)       | rs144155527 | 10        | 114737633 | 0.171                                | 0.6778     | 5                     | 10                    | 13                   | 13                           | 14                 | FOXA2                                          | 98.17   | 1.83    |
|            |               |                                        |             | rs116761056 | 10        | 114737324 | 0.044                                | 0.1753     | 5                     | 10                    | 13                   | 13                           | 14                 | NKX2.2, NKX6.1, PDX1                           | 97.99   | 2.01    |
|            |               |                                        |             | rs114322470 | 10        | 114736670 | 0.146                                | 0.0462     | 2                     | 10                    | 13                   | 13                           | 14                 |                                                | 98.16   | 1.84    |
|            |               |                                        |             | rs184509201 | 10        | 114740337 | 0.186                                | 0.0292     | 12                    | 13                    | 10                   | 13                           | 14                 |                                                | 98.18   | 1.82    |
|            |               |                                        |             | rs192408510 | 10        | 114739988 | 0.163                                | 0.0257     | 12                    | 13                    | 10                   | 13                           | 14                 |                                                | 98.17   | 1.83    |
|            |               |                                        |             | rs145034729 | 10        | 114741673 | 0.094                                | 0.0148     | 12                    | 13                    | 10                   | 13                           | 14                 |                                                | 98.17   | 1.83    |
|            |               |                                        |             | rs149954646 | 10        | 114741507 | 0.089                                | 0.014      | 12                    | 13                    | 10                   | 13                           | 14                 |                                                | 98.17   | 1.83    |
|            |               |                                        |             | rs147932983 | 10        | 114743171 | 0.08                                 | 0.0127     | 12                    | 13                    | 13                   | 13                           | 14                 |                                                | 98.15   | 1.85    |
|            |               |                                        |             | rs182610315 | 10        | 114743091 | 0.027                                | 0          | 12                    | 13                    | 13                   | 13                           | 14                 |                                                | 98.17   | 1.83    |
|            | rs180988137   | 1979 (9)                               | 1608 (11)   | rs180988137 | 10        | 114751173 | 0.289                                | 0.3612     | 2                     | 13                    | 14                   | 13                           | 13                 |                                                | 1.04    | 1.04    |
|            |               |                                        |             | rs146398962 | 10        | 114772182 | 0.133                                | 0.1601     | 2                     | 13                    | 8                    | 13                           | 13                 |                                                | 0.56    | 0.56    |
|            |               |                                        |             | rs180726800 | 10        | 114784926 | 0.064                                | 0.0415     | 12                    | 13                    | 10                   | 13                           | 10                 |                                                | 1.95    | 1.95    |
|            |               |                                        |             | rs151137175 | 10        | 114741473 | 0.056                                | 0.0361     | 12                    | 13                    | 10                   | 13                           | 14                 |                                                | 0.42    | 0.42    |
|            |               |                                        |             | rs145003494 | 10        | 114834411 | 0.02                                 | 0.0262     | 4                     | 10                    | 8                    | 13                           | 8                  |                                                | 1.03    | 1.03    |
|            |               |                                        |             | rs4917646   | 10        | 114902811 | 0.003                                | 0.0239     | 3                     | 10                    | 14                   | 14                           | 14                 |                                                | 21.13   | 21.13   |
|            |               |                                        |             | rs186384225 | 10        | 114808119 | 0.002                                | 0.019      | 5                     | 10                    | 8                    | 10                           | 10                 | FOXA2                                          | 0.37    | 0.37    |
|            |               |                                        |             | rs3814575   | 10        | 114898739 | 0.011                                | 0.0177     | 2                     | 13                    | 11                   | 13                           | 13                 |                                                | 29.46   | 29.46   |
|            |               |                                        |             | rs7080044   | 10        | 114899115 | 0.011                                | 0.0172     | 2                     | 13                    | 8                    | 13                           | 13                 |                                                | 29.4    | 29.4    |
|            |               |                                        |             | rs72828151  | 10        | 114968347 | 0.021                                | 0.012      | 12                    | 16                    | 16                   | 16                           | 16                 |                                                | 0.53    | 0.53    |
|            |               |                                        |             | rs10787478  | 10        | 114899446 | 0.013                                | 0.01       | 12                    | 13                    | 11                   | 13                           | 13                 |                                                | 29.42   | 29.42   |
| rs78025551 | 339 (6)       | 133 (7)                                | rs78025551  | 10          | 114757956 | 0.399     | 0.4119                               | 4          | 10                    | 10                    | 13                   | 13                           |                    | 85.1                                           | 14.9    |         |
|            |               |                                        | rs57225583  | 10          | 114771843 | 0.132     | 0.137                                | 2          | 13                    | 11                    | 13                   | 13                           |                    | 85.23                                          | 14.77   |         |
|            |               |                                        | rs11196183  | 10          | 114750264 | 0.106     | 0.1092                               | 2          | 13                    | 13                    | 13                   | 13                           |                    | 85.08                                          | 14.92   |         |
|            |               |                                        | rs7896811   | 10          | 114766717 | 0.101     | 0.1051                               | 2          | 13                    | 7                     | 11                   | 11                           |                    | 85.32                                          | 14.68   |         |
|            |               |                                        | rs11196182  | 10          | 114750157 | 0.093     | 0.0962                               | 2          | 13                    | 13                    | 13                   | 13                           |                    | 85.03                                          | 14.97   |         |
|            |               |                                        | rs114863326 | 10          | 114783775 | 0.069     | 0.0376                               | 12         | 13                    | 13                    | 13                   | 10                           |                    | 85.28                                          | 14.72   |         |
|            |               |                                        | rs11196191  | 10          | 114780633 | 0.001     | 0.0169                               | 5          | 8                     | 8                     | 8                    | 8                            | NKX2.2             | 46.97                                          | 46.97   |         |
| rs34855922 | 2 (2)         | 2 (2)                                  | rs34855922  | 10          | 114871594 | 0.783     | 0.7793                               | 2          | 13                    | 10                    | 13                   | 8                            |                    | 71.62                                          | 28.38   |         |
|            |               |                                        | rs11196234  | 10          | 114874406 | 0.21      | 0.2123                               | 2          | 13                    | 10                    | 13                   | 8                            |                    | 76.48                                          | 23.52   |         |

PPA: posterior probability of association; MAF: minor allele frequency; 1: Active promoter; 2: Weak enhancer; 3: Weak enhan+ATAC+Meth; 4: Strong enhancer; 5: Strong enhan+ATAC+Meth; 6: 1\_Active\_TSS; 7: 8\_Genic\_enhancer; 8: 9\_Active\_enhancer\_1; 9: 10\_Active\_enhancer\_1; 10: 10\_Active\_enhancer\_2; 11: 11\_Weak\_enhancer; 12: Heterochromatin; 13: 6\_Weak\_transcription; 14: 5\_Strong\_transcription; 15: 17\_Weak\_repressed\_polycomb; 16: 18\_Quiescent/low\_signal.

<sup>1</sup>Thurner, M. et al. Integration of human pancreatic islet genomic data refines regulatory mechanisms at Type 2 Diabetes susceptibility loci. *bioRxiv* (2017).

<sup>2</sup>Varshney, A. et al. Genetic regulatory signatures underlying islet gene expression and type 2 diabetes. *Proc Natl Acad Sci U S A* 114, 2301-2306 (2017).

<sup>3</sup>Pasquali, L. et al. Pancreatic islet enhancer clusters enriched in type 2 diabetes risk-associated variants. *Nat Genet* 46, 136-143 (2014).



**Supplementary Table 10 | Summary results of LD Score regression analyses between T2D and various diseases, metabolic, and anthropometric traits.**

| Phenotype                                                      | Category        | T2D-unadjusted for BMI        |        |        |                        | T2D-adjusted for BMI          |        |         |                       | Reference (PMID) |
|----------------------------------------------------------------|-----------------|-------------------------------|--------|--------|------------------------|-------------------------------|--------|---------|-----------------------|------------------|
|                                                                |                 | Genetic Correlation ( $r_g$ ) | SE     | z      | P-value                | Genetic Correlation ( $r_g$ ) | SE     | z       | P-value               |                  |
| Mothers age at death                                           | aging           | -0.3356                       | 0.0598 | -5.61  | 2.0x10 <sup>-8</sup>   | -0.2022                       | 0.0628 | -3.2225 | 0.001                 | 27015805         |
| Parents age at death                                           | aging           | -0.4033                       | 0.0718 | -5.62  | 1.9x10 <sup>-8</sup>   | -0.3183                       | 0.0738 | -4.3096 | 0.00002               | 27015805         |
| Fathers age at death                                           | aging           | -0.4473                       | 0.0611 | -7.32  | 2.5x10 <sup>-13</sup>  | -0.2823                       | 0.058  | -4.8647 | 1.1x10 <sup>-6</sup>  | 27015805         |
| Waist circumference                                            | anthropometric  | 0.5917                        | 0.0237 | 24.96  | 1.8x10 <sup>-137</sup> | 0.2417                        | 0.0296 | 8.1671  | 3.2x10 <sup>-16</sup> | 25673412         |
| Waist-to-hip ratio                                             | anthropometric  | 0.5649                        | 0.0304 | 18.56  | 6.3x10 <sup>-77</sup>  | 0.3761                        | 0.0328 | 11.4794 | 1.7x10 <sup>-30</sup> | 25673412         |
| Overweight                                                     | anthropometric  | 0.5608                        | 0.0308 | 18.20  | 5.6x10 <sup>-74</sup>  | 0.1734                        | 0.034  | 5.1067  | 3.3x10 <sup>-7</sup>  | 23563607         |
| Obesity class 1                                                | anthropometric  | 0.539                         | 0.0305 | 17.69  | 5.0x10 <sup>-70</sup>  | 0.1437                        | 0.0324 | 4.437   | 9.1x10 <sup>-6</sup>  | 23563607         |
| Body mass index                                                | anthropometric  | 0.5098                        | 0.0293 | 17.38  | 1.1x10 <sup>-67</sup>  | 0.0981                        | 0.0313 | 3.1391  | 0.002                 | 20935630         |
| Obesity class 2                                                | anthropometric  | 0.5433                        | 0.0376 | 14.45  | 2.7x10 <sup>-47</sup>  | 0.1385                        | 0.0419 | 3.3097  | 0.0009                | 23563607         |
| Hip circumference                                              | anthropometric  | 0.4209                        | 0.0292 | 14.43  | 3.4x10 <sup>-47</sup>  | 0.0554                        | 0.0335 | 1.65    | 0.1                   | 25673412         |
| Extreme bmi                                                    | anthropometric  | 0.5291                        | 0.045  | 11.76  | 6.2x10 <sup>-32</sup>  | 0.1212                        | 0.0492 | 2.4655  | 0.01                  | 23563607         |
| Body fat                                                       | anthropometric  | 0.4815                        | 0.0451 | 10.69  | 1.2x10 <sup>-26</sup>  | 0.1295                        | 0.0467 | 2.7768  | 0.006                 | 26833246         |
| Obesity class 3                                                | anthropometric  | 0.5385                        | 0.0516 | 10.44  | 1.6x10 <sup>-25</sup>  | 0.1298                        | 0.0531 | 2.4459  | 0.01                  | 23563607         |
| Childhood obesity                                              | anthropometric  | 0.3307                        | 0.0396 | 8.35   | 6.7x10 <sup>-17</sup>  | 0.0655                        | 0.0421 | 1.5543  | 0.1                   | 22484627         |
| Extreme waist-to-hip ratio                                     | anthropometric  | 0.3998                        | 0.0601 | 6.65   | 2.9x10 <sup>-11</sup>  | 0.4548                        | 0.0669 | 6.7934  | 1.1x10 <sup>-11</sup> | 23563607         |
| Height; Females at age 10 and males at age 12                  | anthropometric  | 0.1021                        | 0.0371 | 2.75   | 0.006                  | 0.0252                        | 0.042  | 0.5997  | 0.5                   | 23449627         |
| Sitting height ratio                                           | anthropometric  | 0.0511                        | 0.0433 | 1.18   | 0.2                    | 0.0471                        | 0.0464 | 1.0163  | 0.3                   | 25865494         |
| Infant head circumference                                      | anthropometric  | -0.0414                       | 0.0546 | -0.76  | 0.4                    | -0.1059                       | 0.0658 | -1.609  | 0.1                   | 22504419         |
| Extreme height                                                 | anthropometric  | -0.049                        | 0.0339 | -1.44  | 0.1                    | -0.0318                       | 0.039  | -0.8166 | 0.4                   | 23563607         |
| Height_2010                                                    | anthropometric  | -0.0455                       | 0.0228 | -2.00  | 0.05                   | -0.0261                       | 0.0258 | -1.0133 | 0.3                   | 20881960         |
| Child birth length                                             | anthropometric  | -0.1064                       | 0.0465 | -2.29  | 0.02                   | -0.1003                       | 0.052  | -1.9296 | 0.05                  | 25281659         |
| Child birth weight                                             | anthropometric  | -0.1625                       | 0.0506 | -3.21  | 0.001                  | -0.2477                       | 0.0596 | -4.1571 | 0.00003               | 23202124         |
| Difference in height between adolescence and adulthood; age 14 | anthropometric  | -0.2176                       | 0.0651 | -3.34  | 0.0008                 | -0.082                        | 0.0659 | -1.2443 | 0.2                   | 23449627         |
| Difference in height between childhood and adulthood; age 8    | anthropometric  | -0.1824                       | 0.0485 | -3.76  | 0.0002                 | -0.0792                       | 0.0523 | -1.5139 | 0.1                   | 23449627         |
| Birth weight                                                   | anthropometric  | -0.21                         | 0.0334 | -6.28  | 3.4x10 <sup>-10</sup>  | -0.2934                       | 0.0371 | -7.8986 | 2.8x10 <sup>-15</sup> | 27680694         |
| Asthma                                                         | autoimmune      | 0.1706                        | 0.056  | 3.05   | 0.002                  | 0.0922                        | 0.0647 | 1.4259  | 0.2                   | 17611496         |
| Primary biliary cirrhosis                                      | autoimmune      | 0.0804                        | 0.0479 | 1.68   | 0.09                   | 0.0327                        | 0.054  | 0.6064  | 0.5                   | 26394269         |
| Systemic lupus erythematosus                                   | autoimmune      | 0.0704                        | 0.0481 | 1.46   | 0.1                    | 0.0619                        | 0.0514 | 1.2047  | 0.2                   | 26502338         |
| Rheumatoid Arthritis                                           | autoimmune      | 0.0023                        | 0.0269 | 0.08   | 0.9                    | -0.0413                       | 0.0328 | -1.2588 | 0.2                   | 24390342         |
| Crohns disease                                                 | autoimmune      | -0.0105                       | 0.0307 | -0.34  | 0.7                    | -0.0652                       | 0.0357 | -1.8249 | 0.07                  | 26192919         |
| Eczema                                                         | autoimmune      | -0.0258                       | 0.0547 | -0.47  | 0.6                    | -0.0591                       | 0.0611 | -0.9668 | 0.3                   | 26482879         |
| Inflammatory Bowel Disease (Euro)                              | autoimmune      | -0.0365                       | 0.0279 | -1.31  | 0.2                    | -0.0606                       | 0.034  | -1.7807 | 0.08                  | 26192919         |
| Celiac disease                                                 | autoimmune      | -0.0808                       | 0.0474 | -1.70  | 0.09                   | -0.0602                       | 0.0588 | -1.0253 | 0.3                   | 20190752         |
| Ulcerative colitis                                             | autoimmune      | -0.0602                       | 0.0317 | -1.90  | 0.06                   | -0.0476                       | 0.0393 | -1.2109 | 0.2                   | 26192919         |
| Lumbar spine bone mineral density                              | bone            | 0.1088                        | 0.0298 | 3.65   | 0.0003                 | 0.1154                        | 0.0346 | 3.337   | 0.0008                | 22504420         |
| Femoral neck bone mineral density                              | bone            | 0.0893                        | 0.0268 | 3.33   | 0.0009                 | 0.0908                        | 0.0317 | 2.8691  | 0.004                 | 22504420         |
| Femoral Neck bone mineral density                              | bone            | 0.0651                        | 0.0341 | 1.91   | 0.06                   | 0.0771                        | 0.0396 | 1.9476  | 0.05                  | 26367794         |
| Lumbar Spine bone mineral density                              | bone            | 0.052                         | 0.0347 | 1.50   | 0.1                    | 0.0748                        | 0.0411 | 1.8215  | 0.07                  | 26367794         |
| Mean Hippocampus                                               | brain_volume    | 0.0361                        | 0.0632 | 0.57   | 0.6                    | 0.0723                        | 0.0715 | 1.0102  | 0.3                   | 25607358         |
| Mean Caudate                                                   | brain_volume    | 0.013                         | 0.0444 | 0.29   | 0.8                    | 0.031                         | 0.0532 | 0.5826  | 0.6                   | 25607358         |
| Mean Pallidum                                                  | brain_volume    | 0.0062                        | 0.0592 | 0.11   | 0.9                    | 0.0347                        | 0.0665 | 0.5222  | 0.6                   | 25607358         |
| Mean Thalamus                                                  | brain_volume    | -0.0164                       | 0.0624 | -0.26  | 0.8                    | -0.0107                       | 0.0698 | -0.1538 | 0.9                   | 25607358         |
| Mean Putamen                                                   | brain_volume    | -0.0212                       | 0.047  | -0.45  | 0.7                    | 0.0131                        | 0.0505 | 0.2592  | 0.8                   | 25607358         |
| ICV                                                            | brain_volume    | -0.1789                       | 0.057  | -3.14  | 0.002                  | -0.1901                       | 0.0643 | -2.9566 | 0.003                 | 25607358         |
| Lung cancer                                                    | cancer          | 0.1204                        | 0.0422 | 2.85   | 0.004                  | 0.0557                        | 0.0449 | 1.2416  | 0.2                   | 27488534         |
| Squamous cell lung cancer                                      | cancer          | 0.1572                        | 0.0684 | 2.30   | 0.02                   | 0.05                          | 0.0723 | 0.6916  | 0.5                   | 27488534         |
| Lung cancer (all)                                              | cancer          | 0.0982                        | 0.0489 | 2.01   | 0.04                   | 0.0461                        | 0.0534 | 0.8639  | 0.4                   | 24880342         |
| Coronary artery disease                                        | cardiometabolic | 0.3971                        | 0.0278 | 14.29  | 2.5x10 <sup>-46</sup>  | 0.3092                        | 0.0318 | 9.7186  | 2.5x10 <sup>-22</sup> | 26343387         |
| Adiponectin                                                    | cardiometabolic | -0.1809                       | 0.052  | -3.48  | 0.0005                 | -0.2783                       | 0.0606 | -4.5935 | 4.4x10 <sup>-6</sup>  | 22479202         |
| Intelligence                                                   | cognitive       | -0.1149                       | 0.0245 | -4.68  | 2.8x10 <sup>-6</sup>   | -0.0318                       | 0.0273 | -1.1615 | 0.2                   | 28530673         |
| Childhood IQ                                                   | education       | -0.1922                       | 0.0559 | -3.44  | 0.0006                 | -0.1041                       | 0.0654 | -1.592  | 0.1                   | 23358156         |
| College completion                                             | education       | -0.2793                       | 0.0305 | -9.17  | 4.6x10 <sup>-20</sup>  | -0.1422                       | 0.0332 | -4.2839 | 0.00002               | 23722424         |
| Years of schooling 2016                                        | education       | -0.2699                       | 0.0199 | -13.56 | 7.4x10 <sup>-42</sup>  | -0.1402                       | 0.0224 | -6.2626 | 3.8x10 <sup>-10</sup> | 27225129         |
| Fasting insulin main effect                                    | glycemic        | 0.6217                        | 0.0606 | 10.27  | 9.9x10 <sup>-25</sup>  | 0.4429                        | 0.0647 | 6.8465  | 7.6x10 <sup>-12</sup> | 22581228         |
| HbA1C                                                          | glycemic        | 0.5697                        | 0.0624 | 9.12   | 7.2x10 <sup>-20</sup>  | 0.5588                        | 0.0648 | 8.6264  | 6.3x10 <sup>-18</sup> | 20858683         |
| Fasting glucose main effect                                    | glycemic        | 0.5799                        | 0.0672 | 8.63   | 6.2x10 <sup>-18</sup>  | 0.5583                        | 0.068  | 8.211   | 2.2x10 <sup>-16</sup> | 22581228         |
| HOMA-IR                                                        | glycemic        | 0.6632                        | 0.0853 | 7.77   | 7.7x10 <sup>-15</sup>  | 0.4777                        | 0.0825 | 5.7922  | 6.9x10 <sup>-9</sup>  | 20081858         |
| HOMA-B                                                         | glycemic        | 0.2029                        | 0.0602 | 3.37   | 0.0008                 | 0.05                          | 0.0632 | 0.7909  | 0.4                   | 20081858         |
| Heart rate                                                     | haematological  | 0.0695                        | 0.0312 | 2.22   | 0.03                   | 0.093                         | 0.0379 | 2.4543  | 0.01                  | 23583979         |
| Mean platelet volume                                           | haematological  | 0.0819                        | 0.0388 | 2.11   | 0.03                   | 0.0546                        | 0.0446 | 1.226   | 0.2                   | 22139419         |
| Platelet count                                                 | haematological  | 0.0386                        | 0.0335 | 1.15   | 0.2                    | 0.0563                        | 0.0364 | 1.5448  | 0.1                   | 22139419         |
| Leptin_not_adjBMI                                              | hormone         | 0.5036                        | 0.0623 | 8.09   | 6.0x10 <sup>-16</sup>  | 0.2126                        | 0.0603 | 3.5269  | 0.0004                | 26833098         |
| Leptin_adjBMI                                                  | hormone         | 0.1797                        | 0.0579 | 3.11   | 0.002                  | 0.2029                        | 0.0641 | 3.164   | 0.002                 | 26833098         |
| Urinary albumin-to-creatinine ratio                            | kidney          | 0.2556                        | 0.059  | 4.33   | 0.00001                | 0.2561                        | 0.0619 | 4.1348  | 0.00004               | 26631737         |
| Chronic Kidney Disease                                         | kidney          | 0.1128                        | 0.0543 | 2.08   | 0.04                   | 0.0115                        | 0.06   | 0.1914  | 0.8                   | 26831199         |
| Urinary albumin-to-creatinine ratio (non-diabetes)             | kidney          | 0.1133                        | 0.058  | 1.95   | 0.05                   | 0.1103                        | 0.0619 | 1.7835  | 0.07                  | 26631737         |
| Serum creatinine                                               | kidney          | 0.036                         | 0.0273 | 1.32   | 0.2                    | 0.071                         | 0.0307 | 2.312   | 0.02                  | 26831199         |
| Serum creatinine (non-diabetes)                                | kidney          | 0.0264                        | 0.0294 | 0.90   | 0.4                    | 0.0644                        | 0.033  | 1.9505  | 0.05                  | 26831199         |
| Serum cystatin c                                               | kidney          | -0.1611                       | 0.0607 | -2.66  | 0.008                  | -0.0086                       | 0.0426 | -0.2027 | 0.8                   | 26831199         |
| Triglycerides                                                  | lipids          | 0.4065                        | 0.0537 | 7.56   | 3.9x10 <sup>-14</sup>  | 0.3693                        | 0.0569 | 6.4899  | 8.6x10 <sup>-11</sup> | 20686565         |

|                                                                        |               |         |        |        |                       |         |        |         |                       |          |
|------------------------------------------------------------------------|---------------|---------|--------|--------|-----------------------|---------|--------|---------|-----------------------|----------|
| LDL cholesterol                                                        | lipids        | 0.1253  | 0.049  | 2.56   | 0.01                  | 0.1169  | 0.0491 | 2.3799  | 0.02                  | 20686565 |
| Total Cholesterol                                                      | lipids        | 0.0682  | 0.0385 | 1.77   | 0.08                  | 0.0851  | 0.0428 | 1.9904  | 0.05                  | 20686565 |
| HDL cholesterol                                                        | lipids        | -0.475  | 0.0454 | -10.47 | 1.2x10 <sup>-25</sup> | -0.3683 | 0.043  | -8.5709 | 1.0x10 <sup>-17</sup> | 20686565 |
| Forced expiratory volume in 1 second (FEV1)/Forced Vital capacity(FVC) | lung_function | 0.0616  | 0.029  | 2.12   | 0.03                  | 0.0203  | 0.0333 | 0.6087  | 0.5                   | 28166213 |
| Forced expiratory volume in 1 second (FEV1)                            | lung_function | -0.1638 | 0.028  | -5.85  | 5.0x10 <sup>-9</sup>  | -0.1516 | 0.0306 | -4.9565 | 7.2x10 <sup>-7</sup>  | 28166213 |
| Forced Vital capacity(FVC)                                             | lung_function | -0.2325 | 0.0277 | -8.39  | 4.7x10 <sup>-17</sup> | -0.2002 | 0.0303 | -6.6157 | 3.7x10 <sup>-11</sup> | 28166213 |
| Cholesterol esters in large VLDL                                       | metabolites   | 0.3324  | 0.0597 | 5.57   | 2.5x10 <sup>-8</sup>  | 0.2151  | 0.0652 | 3.2998  | 0.001                 | 27005778 |
| Total lipids in large VLDL                                             | metabolites   | 0.3492  | 0.0632 | 5.53   | 3.3x10 <sup>-8</sup>  | 0.2207  | 0.0702 | 3.1456  | 0.002                 | 27005778 |
| Glycoprotein acetyls; mainly a1-acid glycoprotein                      | metabolites   | 0.4508  | 0.0835 | 5.40   | 6.6x10 <sup>-8</sup>  | 0.2878  | 0.0763 | 3.7738  | 0.0002                | 27005778 |
| Total lipids in chylomicrons and largest VLDL particles                | metabolites   | 0.3598  | 0.0682 | 5.27   | 1.3x10 <sup>-7</sup>  | 0.2238  | 0.0722 | 3.1021  | 0.002                 | 27005778 |
| Total lipids in very large VLDL                                        | metabolites   | 0.3116  | 0.0605 | 5.15   | 2.6x10 <sup>-7</sup>  | 0.1713  | 0.0665 | 2.5766  | 0.01                  | 27005778 |
| Concentration of medium VLDL particles                                 | metabolites   | 0.3434  | 0.0675 | 5.08   | 3.7x10 <sup>-7</sup>  | 0.2171  | 0.0703 | 3.0881  | 0.002                 | 27005778 |
| Concentration of chylomicrons and largest VLDL particles               | metabolites   | 0.3627  | 0.0723 | 5.01   | 5.3x10 <sup>-7</sup>  | 0.2426  | 0.0761 | 3.189   | 0.001                 | 27005778 |
| Triglycerides in large VLDL                                            | metabolites   | 0.3695  | 0.0742 | 4.98   | 6.3x10 <sup>-7</sup>  | 0.2328  | 0.079  | 2.9456  | 0.003                 | 27005778 |
| Concentration of very large VLDL particles                             | metabolites   | 0.3371  | 0.0678 | 4.97   | 6.6x10 <sup>-7</sup>  | 0.1955  | 0.0703 | 2.7799  | 0.005                 | 27005778 |
| Total lipids in medium VLDL                                            | metabolites   | 0.3542  | 0.0721 | 4.91   | 8.9x10 <sup>-7</sup>  | 0.2253  | 0.0734 | 3.071   | 0.002                 | 27005778 |
| Mean diameter for VLDL particles                                       | metabolites   | 0.3487  | 0.0722 | 4.83   | 1.4x10 <sup>-6</sup>  | 0.2575  | 0.0772 | 3.3344  | 0.0009                | 27005778 |
| Triglycerides in very large VLDL                                       | metabolites   | 0.325   | 0.0676 | 4.81   | 1.5x10 <sup>-6</sup>  | 0.185   | 0.0721 | 2.5663  | 0.01                  | 27005778 |
| Concentration of large VLDL particles                                  | metabolites   | 0.3568  | 0.0742 | 4.81   | 1.5x10 <sup>-6</sup>  | 0.2251  | 0.0762 | 2.9552  | 0.003                 | 27005778 |
| Phospholipids in very large VLDL                                       | metabolites   | 0.3464  | 0.0742 | 4.67   | 3.0x10 <sup>-6</sup>  | 0.191   | 0.0751 | 2.5425  | 0.01                  | 27005778 |
| Isoleucine                                                             | metabolites   | 0.511   | 0.1094 | 4.67   | 3.0x10 <sup>-6</sup>  | 0.4027  | 0.1071 | 3.7607  | 0.0002                | 27005778 |
| Valine                                                                 | metabolites   | 0.4357  | 0.0936 | 4.66   | 3.2x10 <sup>-6</sup>  | 0.3517  | 0.0938 | 3.7484  | 0.0002                | 27005778 |
| Concentration of small VLDL particles                                  | metabolites   | 0.3156  | 0.0681 | 4.63   | 3.6x10 <sup>-6</sup>  | 0.1801  | 0.0674 | 2.6739  | 0.008                 | 27005778 |
| Phospholipids in large VLDL                                            | metabolites   | 0.3459  | 0.0755 | 4.58   | 4.6x10 <sup>-6</sup>  | 0.2099  | 0.0783 | 2.6804  | 0.007                 | 27005778 |
| Phospholipids in chylomicrons and largest VLDL particles               | metabolites   | 0.3465  | 0.0761 | 4.56   | 5.2x10 <sup>-6</sup>  | 0.1957  | 0.078  | 2.5091  | 0.01                  | 27005778 |
| Free cholesterol in large VLDL                                         | metabolites   | 0.3082  | 0.0679 | 4.54   | 5.7x10 <sup>-6</sup>  | 0.1717  | 0.0719 | 2.3889  | 0.02                  | 27005778 |
| Triglycerides in medium VLDL                                           | metabolites   | 0.4306  | 0.095  | 4.53   | 5.8x10 <sup>-6</sup>  | 0.2902  | 0.0932 | 3.1154  | 0.002                 | 27005778 |
| Total cholesterol in large VLDL                                        | metabolites   | 0.306   | 0.0684 | 4.48   | 7.6x10 <sup>-6</sup>  | 0.1703  | 0.0719 | 2.3679  | 0.02                  | 27005778 |
| Triglycerides in chylomicrons and largest VLDL particles               | metabolites   | 0.3948  | 0.0908 | 4.35   | 0.00001               | 0.2379  | 0.0906 | 2.6257  | 0.009                 | 27005778 |
| Triglycerides in small VLDL                                            | metabolites   | 0.3608  | 0.083  | 4.35   | 0.00001               | 0.2089  | 0.0789 | 2.6469  | 0.008                 | 27005778 |
| Total lipids in small VLDL                                             | metabolites   | 0.305   | 0.0702 | 4.35   | 0.00001               | 0.1668  | 0.0681 | 2.4488  | 0.01                  | 27005778 |
| Phospholipids in medium VLDL                                           | metabolites   | 0.363   | 0.0848 | 4.28   | 0.00002               | 0.2194  | 0.0815 | 2.6909  | 0.007                 | 27005778 |
| Serum total triglycerides                                              | metabolites   | 0.3499  | 0.0842 | 4.16   | 0.00003               | 0.203   | 0.0803 | 2.528   | 0.01                  | 27005778 |
| Triglycerides in very small VLDL                                       | metabolites   | 0.2897  | 0.0704 | 4.12   | 0.00004               | 0.1495  | 0.0685 | 2.1839  | 0.03                  | 27005778 |
| Cholesterol esters in medium VLDL                                      | metabolites   | 0.2746  | 0.0668 | 4.11   | 0.00004               | 0.1563  | 0.067  | 2.3314  | 0.02                  | 27005778 |
| Free cholesterol in medium VLDL                                        | metabolites   | 0.3337  | 0.0816 | 4.09   | 0.00004               | 0.1933  | 0.0799 | 2.4187  | 0.02                  | 27005778 |
| Total cholesterol in medium VLDL                                       | metabolites   | 0.2793  | 0.0735 | 3.80   | 0.0001                | 0.1473  | 0.0722 | 2.0391  | 0.04                  | 27005778 |
| Free cholesterol in small VLDL                                         | metabolites   | 0.2781  | 0.0757 | 3.67   | 0.0002                | 0.1313  | 0.073  | 1.7999  | 0.07                  | 27005778 |
| Phospholipids in small VLDL                                            | metabolites   | 0.2693  | 0.0739 | 3.64   | 0.0003                | 0.1226  | 0.0704 | 1.7417  | 0.08                  | 27005778 |
| Triglycerides in IDL                                                   | metabolites   | 0.2403  | 0.0789 | 3.05   | 0.002                 | 0.0916  | 0.0726 | 1.2627  | 0.2                   | 27005778 |
| Concentration of very small VLDL particles                             | metabolites   | 0.2181  | 0.0728 | 3.00   | 0.003                 | 0.0757  | 0.0692 | 1.0933  | 0.3                   | 27005778 |
| Total cholesterol in small VLDL                                        | metabolites   | 0.2376  | 0.0829 | 2.87   | 0.004                 | 0.0899  | 0.0768 | 1.1705  | 0.2                   | 27005778 |
| Total lipids in very small VLDL                                        | metabolites   | 0.2068  | 0.0764 | 2.71   | 0.007                 | 0.0644  | 0.07   | 0.919   | 0.4                   | 27005778 |
| Apolipoprotein B                                                       | metabolites   | 0.3045  | 0.12   | 2.54   | 0.01                  | 0.1482  | 0.0964 | 1.5373  | 0.1                   | 27005778 |
| Alanine                                                                | metabolites   | 0.1355  | 0.0658 | 2.06   | 0.04                  | 0.1271  | 0.0789 | 1.6116  | 0.1                   | 27005778 |
| Total lipids in small LDL                                              | metabolites   | 0.2276  | 0.1114 | 2.04   | 0.04                  | 0.0651  | 0.0885 | 0.7357  | 0.5                   | 27005778 |
| Concentration of small LDL particles                                   | metabolites   | 0.2051  | 0.1009 | 2.03   | 0.04                  | 0.0525  | 0.0843 | 0.6234  | 0.5                   | 27005778 |
| Total cholesterol in small LDL                                         | metabolites   | 0.2297  | 0.1271 | 1.81   | 0.07                  | 0.0631  | 0.0966 | 0.6536  | 0.5                   | 27005778 |
| Concentration of medium LDL particles                                  | metabolites   | 0.2051  | 0.114  | 1.80   | 0.07                  | 0.046   | 0.0901 | 0.5101  | 0.6                   | 27005778 |
| Phospholipids in medium LDL                                            | metabolites   | 0.1801  | 0.1017 | 1.77   | 0.08                  | 0.0337  | 0.0855 | 0.3947  | 0.7                   | 27005778 |
| Total lipids in medium LDL                                             | metabolites   | 0.1958  | 0.1122 | 1.74   | 0.08                  | 0.0412  | 0.0886 | 0.4645  | 0.6                   | 27005778 |
| Phospholipids in very small VLDL                                       | metabolites   | 0.1419  | 0.0856 | 1.66   | 0.1                   | 0.0009  | 0.0743 | 0.0121  | 1.0                   | 27005778 |
| Omega-3 fatty acids                                                    | metabolites   | 0.1078  | 0.0659 | 1.64   | 0.1                   | 0.1148  | 0.0751 | 1.5296  | 0.1                   | 27005778 |
| Concentration of IDL particles                                         | metabolites   | 0.1686  | 0.1032 | 1.63   | 0.1                   | 0.0064  | 0.0833 | 0.0766  | 0.9                   | 27005778 |
| Cholesterol esters in medium LDL                                       | metabolites   | 0.1708  | 0.1047 | 1.63   | 0.1                   | 0.0283  | 0.0866 | 0.3269  | 0.7                   | 27005778 |
| Concentration of large LDL particles                                   | metabolites   | 0.1728  | 0.1114 | 1.55   | 0.1                   | 0.0135  | 0.0877 | 0.1543  | 0.9                   | 27005778 |
| Total cholesterol in LDL                                               | metabolites   | 0.1633  | 0.1102 | 1.48   | 0.1                   | 0.0117  | 0.0869 | 0.1348  | 0.9                   | 27005778 |
| Total lipids in large LDL                                              | metabolites   | 0.1603  | 0.1093 | 1.47   | 0.1                   | 0.0075  | 0.0873 | 0.0859  | 0.9                   | 27005778 |
| Total cholesterol in medium LDL                                        | metabolites   | 0.145   | 0.1    | 1.45   | 0.1                   | -0.0003 | 0.0835 | -0.0032 | 1                     | 27005778 |
| Total lipids in IDL                                                    | metabolites   | 0.1422  | 0.1007 | 1.41   | 0.2                   | -0.0124 | 0.0827 | -0.15   | 0.9                   | 27005778 |
| Cholesterol esters in large LDL                                        | metabolites   | 0.1449  | 0.1036 | 1.40   | 0.2                   | 0.0046  | 0.0863 | 0.053   | 1                     | 27005778 |
| Phospholipids in IDL                                                   | metabolites   | 0.1426  | 0.1088 | 1.31   | 0.2                   | -0.0271 | 0.0855 | -0.3169 | 0.8                   | 27005778 |
| Phospholipids in large LDL                                             | metabolites   | 0.133   | 0.1024 | 1.30   | 0.2                   | -0.0233 | 0.083  | -0.2807 | 0.8                   | 27005778 |
| Total cholesterol in IDL                                               | metabolites   | 0.0942  | 0.0938 | 1.00   | 0.3                   | -0.0366 | 0.0824 | -0.4436 | 0.7                   | 27005778 |
| Total cholesterol in large LDL                                         | metabolites   | 0.0908  | 0.0911 | 1.00   | 0.3                   | -0.0489 | 0.0806 | -0.6067 | 0.5                   | 27005778 |
| Free cholesterol in large LDL                                          | metabolites   | 0.0618  | 0.0863 | 0.72   | 0.5                   | -0.0698 | 0.0798 | -0.8754 | 0.4                   | 27005778 |
| 22:6 docosahexaenoic acid                                              | metabolites   | 0.0392  | 0.0615 | 0.64   | 0.5                   | 0.0921  | 0.0732 | 1.2569  | 0.2                   | 27005778 |
| Free cholesterol in IDL                                                | metabolites   | 0.0485  | 0.0811 | 0.60   | 0.5                   | -0.082  | 0.0755 | -1.0862 | 0.3                   | 27005778 |
| Description of average fatty acid chain length                         | metabolites   | -0.0035 | 0.0651 | -0.05  | 1.0                   | 0.062   | 0.0772 | 0.8033  | 0.4                   | 27005778 |
| Creatinine                                                             | metabolites   | -0.0272 | 0.0509 | -0.53  | 0.6                   | -0.0509 | 0.0592 | -0.8605 | 0.4                   | 27005778 |
| 18:2 linoleic acid (LA)                                                | metabolites   | -0.0467 | 0.0645 | -0.72  | 0.5                   | -0.1437 | 0.0735 | -1.9543 | 0.05                  | 27005778 |
| Citrate                                                                | metabolites   | -0.0703 | 0.0576 | -1.22  | 0.2                   | 0.0134  | 0.0711 | 0.1883  | 0.9                   | 27005778 |
| Average number of double bonds in a fatty acid chain                   | metabolites   | -0.0955 | 0.058  | -1.65  | 0.1                   | -0.0076 | 0.059  | -0.1294 | 0.9                   | 27005778 |
| Glutamine                                                              | metabolites   | -0.2294 | 0.079  | -2.90  | 0.004                 | -0.1762 | 0.0833 | -2.1138 | 0.03                  | 27005778 |
| Apolipoprotein A-I                                                     | metabolites   | -0.3422 | 0.094  | -3.64  | 0.0003                | -0.3002 | 0.1004 | -2.9906 | 0.003                 | 27005778 |
| Phospholipids in medium HDL                                            | metabolites   | -0.313  | 0.0795 | -3.93  | 0.00008               | -0.2886 | 0.0917 | -3.1472 | 0.002                 | 27005778 |
| Free cholesterol in medium HDL                                         | metabolites   | -0.4022 | 0.0867 | -4.64  | 3.5x10 <sup>-6</sup>  | -0.3364 | 0.0935 | -3.5968 | 0.0003                | 27005778 |
| Phospholipids in very large HDL                                        | metabolites   | -0.4173 | 0.0836 | -4.99  | 6.0x10 <sup>-7</sup>  | -0.2815 | 0.0758 | -3.7153 | 0.0002                | 27005778 |
| Total cholesterol in HDL                                               | metabolites   | -0.4825 | 0.0793 | -6.09  | 1.2x10 <sup>-9</sup>  | -0.352  | 0.078  | -4.5136 | 6.4x10 <sup>-6</sup>  | 27005778 |
| Total cholesterol in large HDL                                         | metabolites   | -0.5129 | 0.0793 | -6.46  | 1.0x10 <sup>-10</sup> | -0.3525 | 0.0738 | -4.7774 | 1.8x10 <sup>-6</sup>  | 27005778 |

|                                      |                   |         |        |        |                       |         |        |         |                      |          |
|--------------------------------------|-------------------|---------|--------|--------|-----------------------|---------|--------|---------|----------------------|----------|
| Mean diameter for HDL particles      | metabolites       | -0.4423 | 0.0673 | -6.57  | 5.1x10 <sup>-11</sup> | -0.3209 | 0.0661 | -4.8538 | 1.2x10 <sup>-6</sup> | 27005778 |
| Free cholesterol in large HDL        | metabolites       | -0.5175 | 0.0778 | -6.65  | 2.9x10 <sup>-11</sup> | -0.3631 | 0.0733 | -4.9548 | 7.2x10 <sup>-7</sup> | 27005778 |
| Cholesterol esters in large HDL      | metabolites       | -0.4714 | 0.0696 | -6.77  | 1.3x10 <sup>-11</sup> | -0.3209 | 0.0674 | -4.7596 | 1.9x10 <sup>-6</sup> | 27005778 |
| Total lipids in large HDL            | metabolites       | -0.4651 | 0.0636 | -7.32  | 2.5x10 <sup>-13</sup> | -0.3276 | 0.0649 | -5.047  | 4.5x10 <sup>-7</sup> | 27005778 |
| Phospholipids in large HDL           | metabolites       | -0.4672 | 0.0625 | -7.48  | 7.6x10 <sup>-14</sup> | -0.3395 | 0.0652 | -5.2054 | 1.9x10 <sup>-7</sup> | 27005778 |
| Concentration of large HDL particles | metabolites       | -0.461  | 0.0613 | -7.52  | 5.3x10 <sup>-14</sup> | -0.328  | 0.0644 | -5.0957 | 3.5x10 <sup>-7</sup> | 27005778 |
| Ferritin                             | metal             | 0.2084  | 0.0683 | 3.05   | 0.002                 | 0.1711  | 0.0743 | 2.304   | 0.2                  | 25352340 |
| Parkinsons disease                   | neurological      | 0.0586  | 0.0369 | 1.59   | 0.1                   | 0.0148  | 0.0424 | 0.349   | 0.7                  | 19915575 |
| Alzheimers disease                   | neurological      | 0.0698  | 0.0656 | 1.06   | 0.3                   | 0.0631  | 0.0679 | 0.9284  | 0.4                  | 24162737 |
| Urate                                | other             | 0.2838  | 0.0658 | 4.31   | 0.00002               | 0.1956  | 0.0526 | 3.7197  | 0.0002               | 23263486 |
| Neuroticism                          | personality       | 0.0599  | 0.041  | 1.46   | 0.1                   | 0.0555  | 0.0393 | 1.4124  | 0.2                  | 27089181 |
| Neo-openness to experience           | personality       | -0.0181 | 0.0616 | -0.29  | 0.8                   | 0.0232  | 0.0712 | 0.3252  | 0.7                  | 21173776 |
| Depressive symptoms                  | psychiatric       | 0.1982  | 0.0379 | 5.24   | 1.6x10 <sup>-7</sup>  | 0.1167  | 0.0382 | 3.0561  | 0.002                | 27089181 |
| Major depressive disorder            | psychiatric       | 0.0528  | 0.0449 | 1.18   | 0.2                   | 0.0664  | 0.0487 | 1.3615  | 0.2                  | 22472876 |
| Subjective well being                | psychiatric       | -0.0377 | 0.0347 | -1.08  | 0.3                   | -0.0287 | 0.0358 | -0.8023 | 0.4                  | 27089181 |
| PGC cross-disorder analysis          | psychiatric       | -0.0323 | 0.0289 | -1.12  | 0.3                   | -0.0049 | 0.0334 | -0.146  | 0.9                  | 23453885 |
| Bipolar disorder                     | psychiatric       | -0.0674 | 0.0328 | -2.06  | 0.04                  | -0.0711 | 0.0369 | -1.9249 | 0.05                 | 21926972 |
| Autism spectrum disorder             | psychiatric       | -0.0947 | 0.0432 | -2.19  | 0.03                  | -0.0697 | 0.0481 | -1.4507 | 0.1                  | 0        |
| Schizophrenia                        | psychiatric       | -0.0596 | 0.0213 | -2.79  | 0.005                 | -0.0426 | 0.0258 | -1.653  | 0.1                  | 25056061 |
| Anorexia Nervosa                     | psychiatric       | -0.1109 | 0.0281 | -3.95  | 0.00008               | -0.0572 | 0.0305 | -1.8733 | 0.06                 | 24514567 |
| Number of children ever born         | reproductive      | 0.1187  | 0.03   | 3.96   | 0.00008               | 0.0429  | 0.035  | 1.2255  | 0.2                  | 27798627 |
| Age at Menopause                     | reproductive      | -0.0957 | 0.031  | -3.08  | 0.002                 | -0.1021 | 0.0355 | -2.8773 | 0.004                | 26414677 |
| Age at Menarche                      | reproductive      | -0.2274 | 0.023  | -9.90  | 4.1x10 <sup>-23</sup> | -0.0987 | 0.0258 | -3.8247 | 0.0001               | 25231870 |
| Age of first birth                   | reproductive      | -0.314  | 0.0259 | -12.12 | 8.1x10 <sup>-34</sup> | -0.1597 | 0.0312 | -5.1217 | 3.0x10 <sup>-7</sup> | 27798627 |
| Insomnia                             | sleeping          | 0.2512  | 0.0417 | 6.03   | 1.6x10 <sup>-9</sup>  | 0.1602  | 0.0437 | 3.6705  | 0.0002               | 28604731 |
| Excessive daytime sleepiness         | sleeping          | 0.1513  | 0.0332 | 4.55   | 5.3x10 <sup>-6</sup>  | 0.1136  | 0.0383 | 2.9646  | 0.003                | 27992416 |
| Chronotype                           | sleeping          | 0.0696  | 0.0258 | 2.70   | 0.007                 | 0.0541  | 0.0301 | 1.7961  | 0.07                 | 27494321 |
| Sleep duration                       | sleeping          | 0.0028  | 0.0402 | 0.07   | 0.9                   | 0.0306  | 0.0405 | 0.7557  | 0.4                  | 27494321 |
| Cigarettes smoked per day            | smoking_behaviour | 0.3494  | 0.0676 | 5.17   | 2.4x10 <sup>-7</sup>  | 0.2138  | 0.0627 | 3.4096  | 0.0007               | 20418890 |
| Ever vs never smoked                 | smoking_behaviour | 0.1626  | 0.0326 | 4.99   | 6.0x10 <sup>-7</sup>  | 0.0641  | 0.0347 | 1.8478  | 0.06                 | 20418890 |
| Age of smoking initiation            | smoking_behaviour | -0.2022 | 0.0768 | -2.63  | 0.008                 | -0.1532 | 0.083  | -1.8449 | 0.07                 | 20418890 |
| Former vs Current smoker             | smoking_behaviour | -0.3052 | 0.0525 | -5.81  | 6.1x10 <sup>-9</sup>  | -0.1933 | 0.052  | -3.72   | 0.0002               | 20418890 |

SE: standard error, BMI: body mass index, HDL: high density lipoprotein, LDL: low density lipoprotein, ADHD: attention deficit hyperactive disorder, HOMA-IR: homeostasis model assessment of insulin resistance, HOMA-B: homeostasis model assessment of beta cell function.

### iii. Supplementary Note

| COHORT                   | ACKNOWLEDGEMENTS                                                                                                                                                                                                                                                                                                                                                                                                                                                                                                                                                                                                                                                                                                                                                                                                                                                                                                                                                                                                                                                                                                                                                                                                                                 |
|--------------------------|--------------------------------------------------------------------------------------------------------------------------------------------------------------------------------------------------------------------------------------------------------------------------------------------------------------------------------------------------------------------------------------------------------------------------------------------------------------------------------------------------------------------------------------------------------------------------------------------------------------------------------------------------------------------------------------------------------------------------------------------------------------------------------------------------------------------------------------------------------------------------------------------------------------------------------------------------------------------------------------------------------------------------------------------------------------------------------------------------------------------------------------------------------------------------------------------------------------------------------------------------|
| <b>DANISH-UCPH</b>       | The Novo Nordisk Foundation Center for Basic Metabolic Research is an independent Research Center at the University of Copenhagen partially funded by an unrestricted donation from the Novo Nordisk Foundation ( <a href="http://www.metabol.ku.dk">www.metabol.ku.dk</a> ). Vejle Diabetes Biobank was supported by The Danish Research Fund and the National Danish Research Fund.                                                                                                                                                                                                                                                                                                                                                                                                                                                                                                                                                                                                                                                                                                                                                                                                                                                            |
| <b>EGCUT</b>             | This study was funded by EU H2020 grants ePerMed and WIDENLIFE, Estonian Research Council Grant IUT20-60, IUT24-6, and European Union through the European Regional Development Fund Project No. 2014-2020.4.01.15-0012 GENTRANSMED.                                                                                                                                                                                                                                                                                                                                                                                                                                                                                                                                                                                                                                                                                                                                                                                                                                                                                                                                                                                                             |
| <b>FHS</b>               | Genotyping, quality control and calling of the Illumina HumanExome BeadChip in the Framingham Heart Study was supported by funding from the National Heart, Lung and Blood Institute Division of Intramural Research (Daniel Levy and Christopher J. O’Donnell, Principle Investigators). Also supported by National Institute for Diabetes and Digestive and Kidney Diseases (NIDDK) R01 DK078616 & U01 DK078616, NIDDK K24 DK080140 and American Diabetes Association Mentor-Based Postdoctoral Fellowship Award #7-09-MN-32, all to Dr. Meigs, and NIDDK Research Career Award K23 DK65978, a Massachusetts General Hospital Physician Scientist Development Award and a Doris Duke Charitable Foundation Clinical Scientist Development Award to Dr. Florez.                                                                                                                                                                                                                                                                                                                                                                                                                                                                                 |
| <b>FUSION</b>            | The FUSION study was supported by DK093757, DK072193, DK062370, and ZIA-HG000024.                                                                                                                                                                                                                                                                                                                                                                                                                                                                                                                                                                                                                                                                                                                                                                                                                                                                                                                                                                                                                                                                                                                                                                |
| <b>GCKD</b>              | The GCKD study was funded by the German Ministry of Research and Education (Bundesministerium für Bildung und Forschung, BMBF) and by the Foundation KfH Stiftung Präventivmedizin. Unregistered grants to support the study were provided by Bayer, Fresenius Medical Care and Amgen. Genotyping was supported by Bayer Pharma AG.                                                                                                                                                                                                                                                                                                                                                                                                                                                                                                                                                                                                                                                                                                                                                                                                                                                                                                              |
| <b>GENOA</b>             | Support for GENOA was provided by the National Heart, Lung and Blood Institute (HL054457, HL054464, HL054481, and HL087660) of the National Institutes of Health.                                                                                                                                                                                                                                                                                                                                                                                                                                                                                                                                                                                                                                                                                                                                                                                                                                                                                                                                                                                                                                                                                |
| <b>GERA</b>              | Data came from a grant, the Resource for Genetic Epidemiology Research in Adult Health and Aging (RC2 AG033067; Schaefer and Risch, PIs) awarded to the Kaiser Permanente Research Program on Genes, Environment, and Health (RPGEH) and the UCSF Institute for Human Genetics. The RPGEH was supported by grants from the Robert Wood Johnson Foundation, the Wayne and Gladys Valley Foundation, the Ellison Medical Foundation, Kaiser Permanente Northern California, and the Kaiser Permanente National and Northern California Community Benefit Programs.                                                                                                                                                                                                                                                                                                                                                                                                                                                                                                                                                                                                                                                                                 |
| <b>GoDARTS</b>           | GoDARTS study was funded by The Wellcome Trust Study Cohort Wellcome Trust Functional Genomics Grant (2004-2008) (Grant No: 072960/2/03/2) and The Wellcome Trust Scottish Health Informatics Programme (SHIP) (2009-2012). (Grant No: 086113/Z/08/Z).                                                                                                                                                                                                                                                                                                                                                                                                                                                                                                                                                                                                                                                                                                                                                                                                                                                                                                                                                                                           |
| <b>GoMAP and TEENAGE</b> | <p><b>GOMAP:</b> This work was funded by the Wellcome Trust (098051). We thank all participants for their important contribution. We are grateful to Georgia Markou, Laiko General Hospital Diabetes Centre, Maria Emetsidou and Panagiota Fotinopoulou, Hippokratio General Hospital Diabetes Centre, Athina Karabela, Dafni Psychiatric Hospital, Eirini Glezou and Marios Mangioros, Dromokaiteio Psychiatric Hospital, Angela Rentari, Harokopio University of Athens, and Danielle Walker, Wellcome Trust Sanger Institute.</p> <p><b>TEENAGE:</b> This research has been co-financed by the European Union (European Social Fund—ESF) and Greek national funds through the Operational Program “Education and Lifelong Learning” of the National Strategic Reference Framework (NSRF)—Research Funding Program: Heracleitus II. Investing in knowledge society through the European Social Fund. This work was funded by the Wellcome Trust (098051). We thank all study participants and their families as well as all volunteers for their contribution in this study. We thank the Sample Management and Genotyping Facilities staff at the Wellcome Trust Sanger Institute for sample preparation, quality control and genotyping.</p> |

|                                  |                                                                                                                                                                                                                                                                                                                                                                                                                                                                                                                                                                                                                                                                                                             |
|----------------------------------|-------------------------------------------------------------------------------------------------------------------------------------------------------------------------------------------------------------------------------------------------------------------------------------------------------------------------------------------------------------------------------------------------------------------------------------------------------------------------------------------------------------------------------------------------------------------------------------------------------------------------------------------------------------------------------------------------------------|
| <b>InterAct</b>                  | The InterAct project (LSHM-CT-2006-037197) is a European-Community funded project under Framework Programme 6. We thank all EPIC participants and staff for their contribution to the study. We thank Nicola Kerrison (MRC Epidemiology Unit, Cambridge) for managing the data for the InterAct Project and staff from the Laboratory Team, Field Epidemiology Team, and Data Functional Group of the MRC Epidemiology Unit in Cambridge, UK, for carrying out sample preparation, DNA provision and quality control, genotyping, and data-handling work.                                                                                                                                                   |
| <b>KORA</b>                      | The KORA research platform (KORA, Cooperative Research in the Region of Augsburg) was initiated and financed by the Helmholtz Zentrum München – German Research Center for Environmental Health, which is funded by the German Federal Ministry of Education and Research and by the State of Bavaria. Furthermore, KORA research was supported within the Munich Center of Health Sciences (MC Health), Ludwig-Maximilians-Universität, as part of LMUinnovativ and by the German Center for Diabetes Research (DZD).                                                                                                                                                                                      |
| <b>MESA</b>                      | This research was supported by the Multi-Ethnic Study of Atherosclerosis (MESA and the MESA SHARe) projects and are conducted and supported by the National Heart, Lung, and Blood Institute (NHLBI) in collaboration with MESA investigators. Support for MESA is provided by contracts HHSN268201500003I, N01-HC-95159, N01-HC-95160, N01-HC-95161, N01-HC-95162, N01-HC-95163, N01-HC-95164, N01-HC-95165, N01-HC-95166, N01-HC-95167, N01-HC-95168, N01-HC-95169, UL1-TR-000040, UL1-TR-001079, UL1-TR-001420, UL1-TR-001881, and DK063491. Provision of exome chip genotyping was provided in part by support of NHLBI contract N02-HL-64278 and UCLA CTSI UL1-TR001881, and the S.Calif DRC DK063491. |
| <b>METSIM</b>                    | The METSIM study was supported by the Academy of Finland (contract 124243), the Finnish Heart Foundation, the Finnish Diabetes Foundation, Tekes (contract 1510/31/06), and the Commission of the European Community (HEALTH-F2-2007 201681), and the US National Institutes of Health grants DK093757, DK072193, DK062370, and ZIA- HG000024.                                                                                                                                                                                                                                                                                                                                                              |
| <b>MGI</b>                       | Our work was supported by NIH research grants HL117626 and HG007022. The Michigan Genomics Initiative was supported by internal research funds from the University of Michigan School of Public Health, the University of Michigan Medical School, and the University of Michigan President's Office. We are especially grateful to the generosity of all research participants.                                                                                                                                                                                                                                                                                                                            |
| <b>Mount Sinai BioMe Biobank</b> | The Mount Sinai BioMe Biobank is supported by The Andrea and Charles Bronfman Philantropies.                                                                                                                                                                                                                                                                                                                                                                                                                                                                                                                                                                                                                |
| <b>PIVUS and ULSAM</b>           | The PIVUS/ULSAM studies were supported by Wellcome Trust Grants WT098017, WT064890, WT090532, Uppsala University, Uppsala University Hospital, the Swedish Research Council and the Swedish Heart-Lung Foundation.                                                                                                                                                                                                                                                                                                                                                                                                                                                                                          |
| <b>PROSPER</b>                   | The PROSPER study was supported by an investigator initiated grant obtained from Bristol-Myers Squibb. Prof. Dr. J. W. Jukema is an Established Clinical Investigator of the Netherlands Heart Foundation (grant 2001 D 032). Support for genotyping was provided by the seventh framework program of the European commission (grant 223004) and by the Netherlands Genomics Initiative (Netherlands Consortium for Healthy Aging grant 050-060-810).                                                                                                                                                                                                                                                       |
| <b>The Rotterdam Study</b>       | The authors are grateful to the Rotterdam Study participants, the staff involved with the Rotterdam Study, and the participating general practitioners and pharmacists. The Rotterdam Study is funded by Erasmus Medical Center and Erasmus University, Rotterdam, Netherlands Organization for the Health Research and Development (ZonMw), the Research Institute for Diseases in the Elderly (RIDE), the Ministry of Education, Culture and Science, the Ministry for Health, Welfare and Sports, the European Commission (DG XII), and the Municipality of Rotterdam.                                                                                                                                   |
| <b>WTCCC</b>                     | Analysis and genotyping of these cohorts was supported by Wellcome Trust funding 090367, 098381, 090532, 083948, 085475, 101630 and 203141; MRC (G0601261), EU (Framework 7) HEALTH-F4-2007-201413, and NIDDK DK098032 and U01-DK105535.                                                                                                                                                                                                                                                                                                                                                                                                                                                                    |

|                                         |                                                                                                                                                                                                                                                                                                 |
|-----------------------------------------|-------------------------------------------------------------------------------------------------------------------------------------------------------------------------------------------------------------------------------------------------------------------------------------------------|
| <b>UK Biobank</b>                       | This study has been conducted using the UK Biobank Resource.                                                                                                                                                                                                                                    |
|                                         |                                                                                                                                                                                                                                                                                                 |
| <b>INDIVIDUAL</b>                       | <b>ACKNOWLEDGEMENTS</b>                                                                                                                                                                                                                                                                         |
| <b>Andrew T Hattersley</b>              | AH is supported by a Wellcome Trust Senior Investigator award (Grant number 098395/Z/12/Z).                                                                                                                                                                                                     |
| <b>Anna L Gloyn</b>                     | ALG is a Wellcome Trust Senior Fellow in Basic Biomedical Science. This work was funded by the Wellcome Trust (095101/Z/10/Z and 200837/Z/16/Z), National Institute for Health Research (NIHR) Oxford Biomedical Research Centre (BRC) and European Union Horizon 2020 Programme (T2D Systems). |
| <b>Anna Köttgen and Matthias Wuttke</b> | The work of AK and MW was supported by the German Research Foundation (KO 3598/3-1 to AK and CRC 1140).                                                                                                                                                                                         |
| <b>Eleftheria Zeggini</b>               | Wellcome Trust (098051)                                                                                                                                                                                                                                                                         |
| <b>Erik Ingelsson</b>                   | NIH/NIDDK 1R01DK106236-01A1                                                                                                                                                                                                                                                                     |
| <b>James B Meigs</b>                    | R01DK078616, U01DK078616, K24DK080140                                                                                                                                                                                                                                                           |
| <b>Jonathan Marchini</b>                | JM acknowledges support from the ERC (grant 617306).                                                                                                                                                                                                                                            |
| <b>Jose C Florez</b>                    | JCF is a Massachusetts General Hospital Research Scholar. Parts of this work are supported by NIDDK U01 DK105554 and NIDDK K24 DK110550.                                                                                                                                                        |
| <b>Josee Dupuis</b>                     | R01DK078616, U01 DK078616                                                                                                                                                                                                                                                                       |
| <b>Mark I McCarthy</b>                  | MIM is a Wellcome Trust Senior Investigator (WT098381); and a National Institute of Health Research Senior Investigator.                                                                                                                                                                        |
| <b>Matthias Thurner</b>                 | MT was supported by a Wellcome Trust Doctoral Studentship (099673/Z/12/Z).                                                                                                                                                                                                                      |
| <b>Ruth J F loos</b>                    | RJFL is supported by the NIH (R01DK110113, U01HG007417, R01DK101855, R01DK107786).                                                                                                                                                                                                              |
